# Supplementary material for: Divergent total synthesis of the revised structures of marine anti-cancer meroterpenoids (+)-dysiherbols A–E
Source: Royal Society of Chemistry journal article supplement (doi:10.1039/d3sc00173c), 2023-01-01
Supplement: d3sc00173c1.pdf [file d3sc00173c1.pdf]

## Electronic Supplementary Information

# Divergent Total Synthesis of the Revised Structures of Marine Anti-Cancer Meroterpenoids (+)-Dysiherbols A–E

Chuanke Chong,<sup>‡<sup>a</sup></sup> Le Chang,<sup>‡<sup>a</sup></sup> Isabelle Grimm,<sup>‡<sup>b</sup></sup> Qunlong Zhang,<sup>a</sup> Yang Kuang,<sup>a</sup> Bingjian Wang,<sup>a</sup> Jingyi Kang,<sup>a</sup> Wenhui Liu,<sup>a</sup> Julian Baars,<sup>b</sup> Yuanqiang Guo,<sup>a</sup> Hans-Günther Schmalz<sup>\*<sup>b</sup></sup> and  
Zhaoyong Lu<sup>\*<sup>a</sup></sup>

<sup>a</sup>. State Key Laboratory of Medicinal Chemical Biology, College of Pharmacy, Nankai University, 38 Tongyan Rd, Tianjin 300350, China. e-mail: [zlu@nankai.edu.cn](mailto:zlu@nankai.edu.cn)

<sup>b</sup>. Department of Chemistry, University of Cologne, Greinstrasse 4, 50939 Koeln, Germany. e-mail: [schmalz@uni-koeln.de](mailto:schmalz@uni-koeln.de)

<sup>‡</sup> These authors contributed equally to this work.

## Table of Contents

|                                                                                                |             |
|------------------------------------------------------------------------------------------------|-------------|
| <b>I. General Methods .....</b>                                                                | <b>S3</b>   |
| <b>II. Experimental Procedures and Physical Data of Compounds .....</b>                        | <b>S5</b>   |
| <b>III. Comparison of Spectroscopic Data of Natural and Synthetic (+)-Dysiherbols A–E.....</b> | <b>S44</b>  |
| <b>IV. <sup>1</sup>H NMR and <sup>13</sup>C NMR Spectra of Compounds.....</b>                  | <b>S62</b>  |
| <b>V. X-Ray Crystallographic Data of Compounds .....</b>                                       | <b>S101</b> |
| <b>VI. References.....</b>                                                                     | <b>S106</b> |

## I. General Methods

**Dry solvents** benzene, dichloromethane (CH<sub>2</sub>Cl<sub>2</sub>), 1,2-dichloroethane (DCE), dimethylformamide (DMF), dioxane, ethanol (EtOH), ethyl acetate (EtOAc), methanol (MeOH), and tetrahydrofuran (THF) were purchased from commercial suppliers and stored under argon. **Reagents** were purchased at the highest commercial quality and used without further purification, unless otherwise noted.

**All reactions** were carried out under an argon atmosphere with dry solvent under anhydrous conditions, unless otherwise noted. **Reactions** were monitored by thin layer chromatography (TLC) carried out on 0.25 mm Huanghai silica gel plates (HSGF254) using UV light as visualizing agent and an ethanolic solution of phosphomolybdic acid (PMA), an aqueous solution of cerium sulfate (Ce(SO<sub>4</sub>)<sub>2</sub>) or a basic aqueous solution of potassium permanganate (KMnO<sub>4</sub>) as developing agents. Huanghai silica gel (200–300 mesh) was used for flash column chromatography (FCC). **Yields** refer to chromatographically and spectroscopically (<sup>1</sup>H NMR) homogenous material, unless otherwise stated.

**Nuclear magnetic resonance (NMR)** spectra were recorded on Bruker AV 400 or Bruker AV 500 instrument and calibrated using residual undeuterated solvent (CDCl<sub>3</sub>, δ<sub>H</sub> = 7.26 ppm, δ<sub>C</sub> = 77.16 ppm; C<sub>6</sub>D<sub>6</sub>, δ<sub>H</sub> = 7.16 ppm, δ<sub>C</sub> = 128.06 ppm; CD<sub>3</sub>OD, δ<sub>H</sub> = 3.31 ppm, δ<sub>C</sub> = 49.00 ppm; pyridine-*d*<sub>5</sub>, δ<sub>H</sub> = 8.74 ppm, δ<sub>C</sub> = 150.35 ppm) as an internal reference, unless otherwise noted. The following abbreviations were used to designate multiplicities: s = singlet, d = doublet, t = triplet, q = quartet, quint = quintet, m = multiplet, br = broad. **Melting points (M.P.)** were recorded on a Shanghai YiCe WRX-4 melting-point apparatus with microscope. **Infrared (IR)** spectra were recorded on a Bruker Tensor 37 FT-IR spectrometer. **High resolution mass spectrometry (HRMS)** spectra were recorded on Varian 7.0 T FTMS mass spectrometer using ESI (electrospray ionization). **Optical rotations** were recorded on an InsMark IP120 polarimeter. **X-ray diffractions** were recorded on a Rigaku XtalAB PRO MM007 DW apparatus. **Chiral high performance liquid chromatography (HPLC)** analyses were recorded on a Shimadzu LC 20A apparatus. **Experimental ECD** spectra were recorded on a BioLogic MOS-450 apparatus.

**ECD Calculations:** Systematic conformational searches of each compound were applied using MOE software, and the appropriate conformation was subjected to geometry optimizations and re-optimizations, which were performed at the B3LYP/6-31+G(d, p) level using Gaussian 09. TDDFT calculations for the optimized conformers were conducted at the CAM-B3LYP/SVP level with a

CPCM solvent model in MeOH. The extract of the calculated ECD curves was finished by SpecDis 1.62 software, and a half-bandwidth of  $\sim 0.4$  eV was used to simulate the calculated ECD spectra of different conformers. Boltzmann distribution was used to weigh the ECD curves of each compound after UV correction.



## II. Experimental Procedures and Physical Data of Compounds

### Preparation of diketone 17:

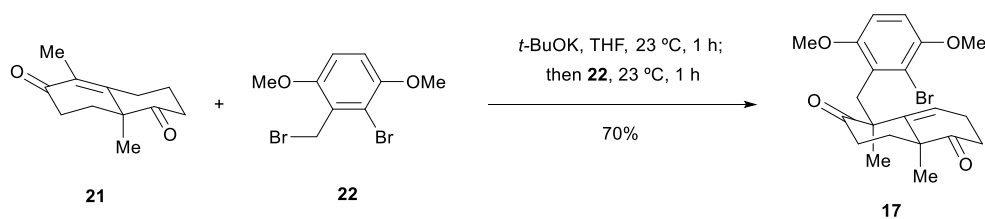

To a stirred solution of Wieland–Miescher ketone derivative (+)-**21** (1.49 g, 7.74 mmol, 1.2 equiv.) in THF (10 mL) was added *t*-BuOK (7.10 mL, 7.10 mmol, 1.0 M in THF, 1.1 equiv.) at 0 °C. The resulting mixture was warmed to 23 °C and allowed to stir at this temperature for 1 h. A solution of benzyl bromide **22** (2.00 g, 6.45 mmol, 1.0 equiv.) in THF (2 mL) was added to the above solution at 23 °C. Then the resulting solution was allowed to stir at this temperature for 1 h. The reaction mixture was quenched with saturated aqueous NH<sub>4</sub>Cl (100 mL) and extracted with EtOAc (3 × 50 mL). The combined organic layers were washed with brine (50 mL), dried over anhydrous Na<sub>2</sub>SO<sub>4</sub>, filtered, and concentrated under reduced pressure. The crude product was purified by flash column chromatography (silica gel, petroleum ether:EtOAc = 10:1→8:1) to give diketone **17** (1.90 g, 4.52 mmol, 70%).

### Characterization of diketone 17:

**Physical state:** white solid;

**M.P.:** 151–153 °C;

**TLC:**  $R_f = 0.39$  (silica gel, petroleum ether:EtOAc = 2:1);

**Optical rotation:**  $[\alpha]_D^{23} = +88.4$  ( $c = 1.0$ , CHCl<sub>3</sub>);

**FT-IR (KBr):**  $\nu_{\text{max}} = 2996, 2884, 2833, 1867, 1721, 1476, 1435, 1261, 1110, 1062, 1030, 820\text{ cm}^{-1}$ ;

**<sup>1</sup>H NMR (400 MHz, C<sub>6</sub>D<sub>6</sub>):**  $\delta = 6.32$  (d,  $J = 9.0$  Hz, 1H),  $6.27$  (d,  $J = 9.0$  Hz, 1H),  $5.60$  (dd,  $J = 5.2, 3.6$  Hz, 1H),  $3.33$  (d,  $J = 13.5$  Hz, 1H),  $3.31$  (s, 3H),  $3.26$  (d,  $J = 13.5$  Hz, 1H),  $3.18$  (s, 3H),  $2.74$  (ddd,  $J = 17.8, 8.0, 1.8$  Hz, 1H),  $2.48\text{--}2.23$  (m, 3H),  $2.18\text{--}2.04$  (m, 2H),  $2.06\text{--}1.84$  (m, 2H),  $1.45$  (s, 3H),  $0.89$  (s, 3H) ppm;

**<sup>13</sup>C NMR (101 MHz, C<sub>6</sub>D<sub>6</sub>):**  $\delta = 211.8, 210.6, 152.9, 150.9, 148.6, 128.2, 122.2, 118.4, 110.6, 109.4, 56.2, 54.9, 53.8, 47.1, 40.9, 34.4, 33.8, 27.5, 24.3, 23.6, 23.2$  ppm;

**HRMS (ESI-TOF):** calcd for C<sub>21</sub>H<sub>26</sub>BrO<sub>4</sub><sup>+</sup> [M+H]<sup>+</sup> 421.1009, found 421.1008.

**Chiral HPLC traces:**

Racemate

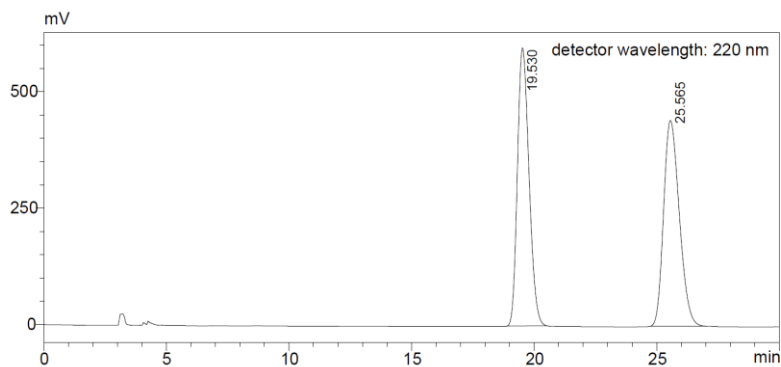

Sample of ketone **17**

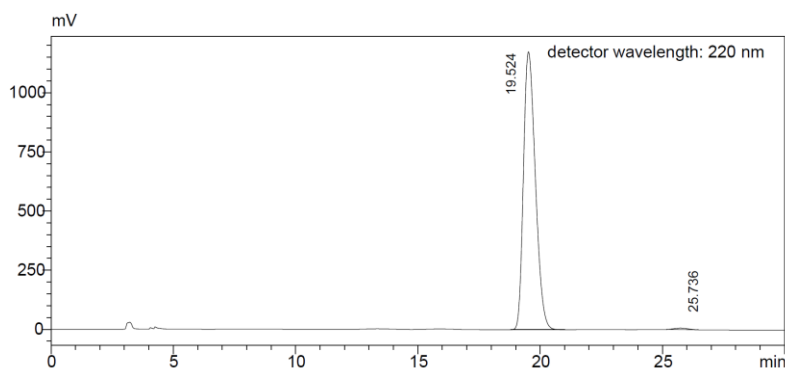

| Sample                     | Peak area<br>( <i>t</i> = 19.3 min) | Peak area<br>( <i>t</i> = 25.8 min) | ee <sup>a</sup> |
|----------------------------|-------------------------------------|-------------------------------------|-----------------|
| Racemate                   | 50.0%                               | 50.0%                               | 0%              |
| Sample of ketone <b>17</b> | 99.4%                               | 0.6%                                | 98.8%           |

<sup>a</sup>The ee values were determined by Chiral HPLC (column: CHIRALCEL<sup>®</sup> OZH0CE-PF10,  $\phi$ 0.46 cm  $\times$  25.0 cm  $\times$  5  $\mu$ m), *n*-hexane:*i*-PrOH = 90:10, temperature: 35 °C, flow rate: 1 mL/min, detector wavelength: 220 nm).

### Preparation of tetracyclic diketone **18** and tetracyclic diene **S1**<sup>1</sup>:

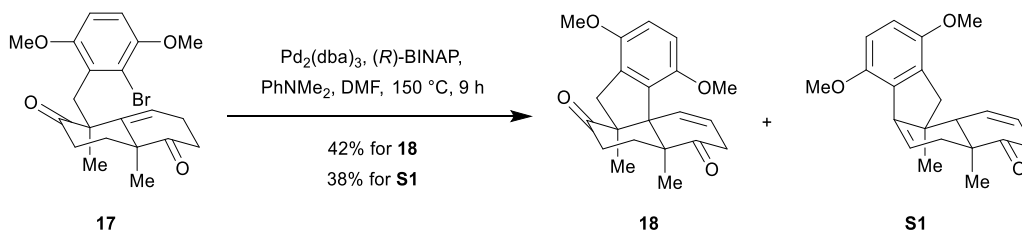

To a stirred solution of diketone **17** (50.3 mg, 119  $\mu$ mol, 1.0 equiv.), Pd<sub>2</sub>(dba)<sub>3</sub> (54.5 mg, 59.5  $\mu$ mol, 0.5 equiv.), and (*R*)-BINAP (74.1 mg, 119  $\mu$ mol, 1.0 equiv.) in DMF (5 mL) was added PhNMe<sub>2</sub> (2.5 mL) at 23 °C. The resulting mixture was heated to 150 °C and stirred at this temperature for 9 h. The reaction mixture was diluted with 3 M HCl (50 mL) and then extracted with EtOAc (3  $\times$  30 mL). The combined organic layers were washed with brine (30 mL), dried over anhydrous Na<sub>2</sub>SO<sub>4</sub>, filtered,

and concentrated under reduced pressure. The crude product was purified by flash column chromatography (silica gel, petroleum ether:EtOAc = 30:1→5:1) to give tetracyclic diketone **18** (17.1 mg, 50.1  $\mu\text{mol}$ , 42%) and tetracyclic diene **S1** (14.7 mg, 45.4  $\mu\text{mol}$ , 38%).

#### Characterization of tetracyclic diketone **18**:

**Physical state:** white solid;

**M.P.:** 193–195 °C;

**TLC:**  $R_f$  = 0.46 (silica gel, petroleum ether:EtOAc = 2:1);

**Optical rotation:**  $[\alpha]_D^{23} = +350$  ( $c = 1.0$ ,  $\text{CHCl}_3$ );

**FT-IR (KBr):**  $\nu_{\text{max}} = 3032, 2962, 2935, 2833, 1692, 1496, 1452, 1263, 1144, 1097, 1066, 984, 954, 798, 720, 691 \text{ cm}^{-1}$ ;

**$^1\text{H}$  NMR (400 MHz,  $\text{C}_6\text{D}_6$ ):**  $\delta = 6.31$  (d,  $J = 8.7$  Hz, 1H), 6.25 (d,  $J = 8.7$  Hz, 1H), 5.40 (dt,  $J = 10.3, 2.1$  Hz, 1H), 5.32 (dt,  $J = 10.3, 3.3$  Hz, 1H), 3.39 (d,  $J = 17.3$  Hz, 1H), 3.31 (s, 3H), 3.23 (s, 3H), 2.88–2.78 (m, 1H), 2.82–2.77 (m, 1H), 2.71 (dt,  $J = 22.3, 2.7$  Hz, 1H), 2.24 (ddd,  $J = 15.7, 9.6, 4.3$  Hz, 1H), 2.10–1.87 (m, 3H), 1.43 (s, 3H), 0.96 (s, 3H) ppm;

**$^{13}\text{C}$  NMR (101 MHz,  $\text{C}_6\text{D}_6$ ):**  $\delta = 215.1, 206.3, 150.2, 150.2, 135.3, 130.5, 127.3, 122.4, 109.9, 109.7, 61.7, 58.8, 55.1, 53.4, 49.0, 43.1, 37.3, 34.6, 26.5, 22.1, 21.4$  ppm;

**HRMS (ESI-TOF):** calcd for  $\text{C}_{21}\text{H}_{25}\text{O}_4^+$   $[\text{M}+\text{H}]^+$  341.1747, found 341.1743.

#### Characterization of tetracyclic diene **S1**:

**Physical state:** colorless oil;

**TLC:**  $R_f$  = 0.41 (silica gel, petroleum ether:EtOAc = 5:1);

**Optical rotation:**  $[\alpha]_D^{23} = +112$  ( $c = 1.0$ ,  $\text{CHCl}_3$ );

**FT-IR (KBr):**  $\nu_{\text{max}} = 3040, 2945, 2902, 2833, 1707, 1497, 1459, 1258, 1099, 1078, 1001, 828, 792, 717 \text{ cm}^{-1}$ ;

**$^1\text{H}$  NMR (400 MHz,  $\text{C}_6\text{D}_6$ ):**  $\delta = 6.83$  (dd,  $J = 6.5, 3.1$  Hz, 1H), 6.45 (d,  $J = 8.8$  Hz, 1H), 6.42 (d,  $J = 8.8$  Hz, 1H), 5.49 (dd,  $J = 6.8, 2.9$  Hz, 1H), 3.58 (dd,  $J = 17.5, 6.5$  Hz, 1H), 3.47 (s, 3H), 3.37 (s, 3H), 3.25 (d,  $J = 15.8$  Hz, 1H), 3.03 (d,  $J = 15.7$  Hz, 1H), 2.28 (ddd,  $J = 17.0, 6.9, 3.2$  Hz, 1H), 2.17 (dd,  $J = 17.5, 3.1$  Hz, 1H), 2.14–2.03 (m, 1H), 1.97 (dt,  $J = 16.9, 7.6$  Hz, 1H), 1.86–1.73 (m, 1H), 1.26 (s, 3H), 1.17 (s, 3H) ppm;

**$^{13}\text{C}$  NMR (101 MHz,  $\text{C}_6\text{D}_6$ ):**  $\delta = 210.9, 151.7, 151.1, 148.8, 146.5, 132.9, 129.0, 120.4, 120.4, 109.5,$

109.3, 55.2, 55.0, 49.4, 49.3, 42.7, 34.2, 32.4, 27.4, 25.7, 22.8 ppm;

**HRMS (ESI-TOF):** calcd for  $C_{21}H_{25}O_4^+$   $[M+H]^+$  325.1798, found 325.1795.

### Preparation of bistriflate **23**:

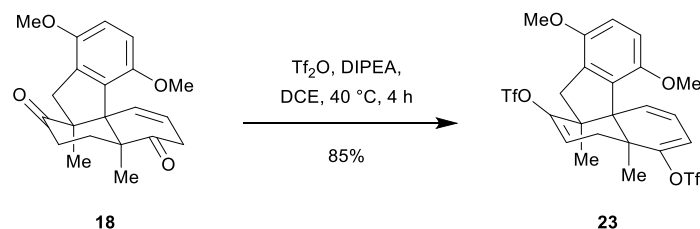

To a stirred solution of diketone **18** (322 mg, 0.947 mmol, 1.0 equiv.) in DCE (10 mL) were added DIPEA (1.61 mL, 9.47 mmol, 10.0 equiv.) and  $\text{Tf}_2\text{O}$  (1.60 mL, 9.47 mmol, 10.0 equiv.) at 0 °C. Then the reaction mixture was heated to 40 °C and allowed to stir at this temperature for 4 h. The reaction mixture was diluted with saturated aqueous citric acid (100 mL). After extraction with  $\text{CH}_2\text{Cl}_2$  ( $3 \times 10$  mL), the combined organic layers were washed with brine (5 mL), dried over anhydrous  $\text{Na}_2\text{SO}_4$ , and filtered. The solvent was removed in vacuo and the residue was purified by flash column chromatography (silica gel, petroleum ether:EtOAc = 80:1→40:1) to give bistriflate **23** (486 mg, 0.805 mmol, 85%).

### Characterization of triflate **23**:

**Physical state:** yellow oil;

**TLC:**  $R_f = 0.48$  (silica gel, petroleum ether:EtOAc = 5:1);

**Optical rotation:**  $[\alpha]_D^{23} = +366.9$  ( $c = 1.0$ ,  $\text{CHCl}_3$ );

**FT-IR (KBr):**  $\nu_{\text{max}} = 3434, 2943, 2841, 1589, 1494, 1465, 1413, 1253, 1213, 1141, 1078, 989, 868, 605 \text{ cm}^{-1}$ ;

**$^1\text{H NMR}$  (400 MHz,  $\text{C}_6\text{D}_6$ ):**  $\delta = 6.34$  (d,  $J = 8.8$  Hz, 1H), 6.26 (d,  $J = 8.8$  Hz, 1H), 5.71 (d,  $J = 6.3$  Hz, 1H), 5.34–5.25 (m, 2H), 5.12 (d,  $J = 9.6$  Hz, 1H), 3.42 (d,  $J = 16.8$  Hz, 1H), 3.35 (s, 3H), 3.27 (s, 3H), 2.59 (d,  $J = 16.8$  Hz, 1H), 2.34–2.25 (m, 1H), 1.79 (dd,  $J = 17.6, 6.4$  Hz, 1H), 1.36 (s, 3H), 1.30 (s, 3H) ppm;

**$^{13}\text{C NMR}$  (101 MHz,  $\text{C}_6\text{D}_6$ ):**  $\delta = 156.2, 152.0, 150.8, 150.7, 134.9, 129.6, 124.6, 120.6, 119.1$  (q,  $J = 319.9$  Hz), 119.0 (q,  $J = 319.6$  Hz), 118.4, 111.6, 109.7, 106.2, 63.9, 55.1, 54.9, 52.7, 39.3, 38.6, 29.6, 20.2, 18.4 ppm;

**HRMS (ESI-TOF):** calcd for  $C_{23}H_{22}F_6O_8S_2Na^+$   $[M+Na]^+$  627.0552, found 627.0558.

### Preparation of triene **24**:

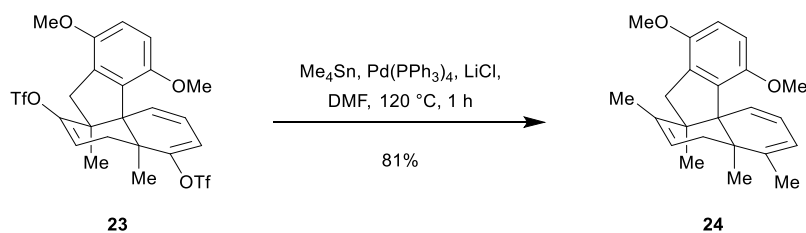

To a stirred solution of bistriflate **23** (365 mg, 0.604 mmol, 1.0 equiv.) and LiCl (126 mg, 3.02 mmol, 5.0 equiv.) in DMF (10 mL) were added Pd(PPh<sub>3</sub>)<sub>4</sub> (140 mg, 121 μmol, 0.2 equiv.) and Me<sub>4</sub>Sn (215 mg, 166 μL, 1.21 mmol, 2.0 equiv.) at 23 °C. The resulting mixture was heated to 120 °C and stirred at this temperature for 1 h. The reaction mixture was diluted with saturated aqueous NH<sub>4</sub>Cl (20 mL) and extracted with EtOAc (3 × 10 mL). The combined organic layers were washed with brine (5 mL), dried over anhydrous Na<sub>2</sub>SO<sub>4</sub>, filtered, and concentrated under reduced pressure. The crude product was purified by flash column chromatography (silica gel, petroleum ether: EtOAc = 500:1→200:1) to give triene **24** (164 mg, 0.489 mmol, 81%).

### Characterization of triene **24**:

**Physical state:** white powder;

**TLC:**  $R_f = 0.44$  (silica gel, petroleum ether:EtOAc = 20:1);

**Optical rotation:**  $[\alpha]_D^{23} = +709.6$  ( $c = 1.0$ , CHCl<sub>3</sub>);

**FT-IR (KBr):**  $\nu_{\max} = 3427, 3004, 2961, 2927, 1586, 1491, 1444, 1370, 1260, 1093, 1060, 1026, 800, 701 \text{ cm}^{-1}$ ;

**<sup>1</sup>H NMR (400 MHz, C<sub>6</sub>D<sub>6</sub>):**  $\delta = 6.49$  (d,  $J = 8.7$  Hz, 1H), 6.32 (d,  $J = 8.7$  Hz, 1H), 5.81 (dd,  $J = 9.6, 5.4$  Hz, 1H), 5.63–5.56 (m, 1H), 5.53 (dq,  $J = 5.4, 1.4$  Hz, 1H), 5.28 (dt,  $J = 6.2, 1.6$  Hz, 1H), 3.37 (s, 3H), 3.34 (d,  $J = 16.1$  Hz, 1H), 3.32 (s, 3H), 2.81 (dd,  $J = 16.2, 1.1$  Hz, 1H), 2.49 (dt,  $J = 16.8, 2.5$  Hz, 1H), 1.90–1.82 (m, 1H), 1.81 (s, 3H), 1.66 (dt,  $J = 2.6, 1.3$  Hz, 3H), 1.47 (s, 3H), 1.32 (s, 3H) ppm;

**<sup>13</sup>C NMR (101 MHz, C<sub>6</sub>D<sub>6</sub>):**  $\delta = 151.6, 150.9, 145.8, 139.5, 137.3, 131.2, 124.8, 124.3, 123.5, 115.0, 112.3, 108.4, 60.8, 55.4, 55.1, 52.8, 39.3, 38.9, 33.3, 21.1, 20.9, 18.8, 17.9$  ppm;

**HRMS (ESI-TOF):** calcd for C<sub>23</sub>H<sub>29</sub>O<sub>2</sub><sup>+</sup> [M+H]<sup>+</sup> 337.2162, found 337.2157.

### Preparation of dimethyl predysiherbol **14** from triene **24**:

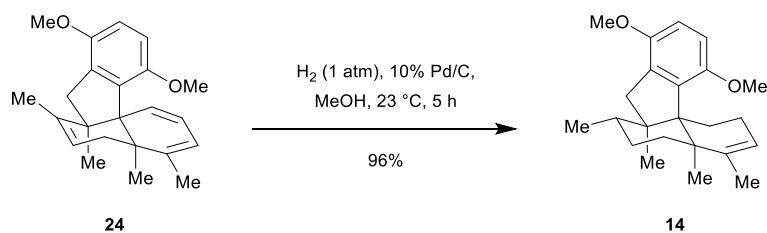

To a stirred solution of olefin **24** (161 mg, 479  $\mu\text{mol}$ , 1.0 equiv.) in MeOH (10 mL) was added 10% Pd/C (1.13 g, 479  $\mu\text{mol}$ , wetted with *ca.* 55% water, 1.0 equiv.) at 23 °C. The resulting mixture was stirred at this temperature for 5 h under  $\text{H}_2$ . The reaction mixture was filtered through Celite<sup>®</sup> and the residue was washed with EtOAc ( $3 \times 20$  mL). Then the combined filtrate was concentrated under reduced pressure. The crude product was purified by flash column chromatography (silica gel, petroleum ether: EtOAc = 500:1  $\rightarrow$  300:1) to give dimethyl predysiherbol **14** (157 mg, 460  $\mu\text{mol}$ , 96%).

### Characterization of dimethyl predysiherbol **14**:

**Physical state:** white solid;

**M.P.:** 112–114 °C;

**TLC:**  $R_f$  = 0.49 (silica gel, petroleum ether:EtOAc = 20:1);

**Optical rotation:**  $[\alpha]_D^{23} = +22.0$  ( $c = 1.0$ ,  $\text{CHCl}_3$ );

**FT-IR (KBr):**  $\nu_{\text{max}} = 2946, 2907, 2830, 1489, 1462, 1380, 1253, 1177, 1070, 1041, 790, 719$   $\text{cm}^{-1}$ ;

**$^1\text{H}$  NMR (400 MHz,  $\text{C}_6\text{D}_6$ ):**  $\delta = 6.58$  (d,  $J = 8.8$  Hz, 1H), 6.49 (d,  $J = 8.8$  Hz, 1H), 5.18–5.12 (m, 1H), 3.43 (s, 3H), 3.38 (s, 3H), 2.93 (d,  $J = 16.2$  Hz, 1H), 2.76 (d,  $J = 16.2$  Hz, 1H), 2.08 (td,  $J = 12.0, 6.1$  Hz, 1H), 1.99–1.87 (m, 2H), 1.83–1.68 (m, 1H), 1.76 (s, 3H), 1.63–1.50 (m, 2H), 1.50–1.40 (m, 1H), 1.44–1.35 (m, 1H), 1.33–1.17 (m, 1H), 1.28 (s, 3H), 1.04 (s, 3H), 0.75 (d,  $J = 6.7$  Hz, 3H) ppm;

**$^{13}\text{C}$  NMR (101 MHz,  $\text{C}_6\text{D}_6$ ):**  $\delta = 152.8, 151.8, 144.7, 140.3, 132.2, 116.7, 111.7, 109.1, 60.3, 55.2, 55.1, 49.7, 40.6, 39.5, 35.0, 31.2, 28.3, 26.4, 24.3, 24.2, 19.5, 17.6, 17.2$  ppm;

**HRMS (ESI-TOF):** calcd for  $\text{C}_{23}\text{H}_{33}\text{O}_2^+$   $[\text{M}+\text{H}]^+$  341.2475, found 341.2476.

### Preparation of ketone **27**:

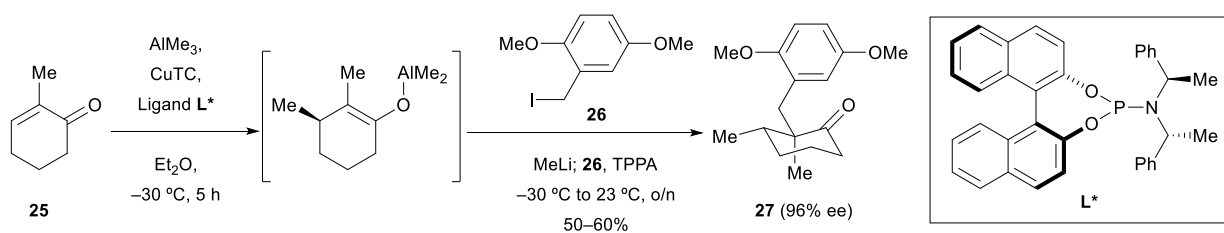

In a flame-dried *Schlenk* flask, a solution of (10 mg, 0.052 mmol, 0.12 equiv.) of copper(I) thiophene-

2-carboxylate (CuTC) and (10 mg, 0.019 mmol, 0.043 equiv.) of the phosphoramidite ligand **L\*** in 1.2 mL of dry Et<sub>2</sub>O was stirred at 23 °C for 30 min. The salmon-colored solution was cooled to –30 °C and (49 mg, 0.44 mmol, 1.0 equiv.) of enone **25** was added. Then, (0.27 mL, 0.54 mmol, 1.2 equiv., 2.0 M in hexanes) of AlMe<sub>3</sub> were added via syringe over a period of 10 min. The reaction mixture was stirred at –30 °C for 5 h, until TLC indicated full conversion of the starting material. The solvents were removed in vacuo at –30 °C (using Schlenk line) until a small volume remained, which was dissolved in 0.45 mL of tripyrrolidinophosphoric acid triamide (TPPA) before (0.39 mL, 0.55 mmol, 1.3 equiv., 1.4 M in Et<sub>2</sub>O) of methyllithium were added (still at –30 °C). Finally, (0.21 g, 0.76 mmol, 1.7 equiv.) of iodide **26** was added and the stirred suspension was allowed to slowly warm up to 23 °C overnight. At this point, GC-MS analysis indicated full conversion of the 1,4-addition intermediate and a diastereoselectivity of 6:1 dr. The reaction mixture was carefully quenched by addition of 2 mL of sat. aqueous NH<sub>4</sub>Cl at 0 °C before 20 mL of H<sub>2</sub>O and 10 mL of sat. aqueous Na K tartrate solution were added (to facilitate phase separation). The aqueous phase was extracted with 3 × 20 mL of *c*-Hex, the combined organic phases were dried over MgSO<sub>4</sub> and the solvent was removed under reduced pressure. The crude product was purified by silica gel column chromatography (*c*-Hex/EtOAc 33:1) to give (38 mg, 0.14 mmol, 32%) of the pure *trans*-product **27**. This product showed an enantiomeric excess of 96% ee as determined by chiral HPLC using a racemic standard (see below). In addition, (7 mg, 0.025 mmol, 6%) *cis*-byproduct *epi*-**27** was obtained.

Note: When the reaction was performed on a 5 g scale, the pure ketone **27** was obtained in 50–60% yield after chromatography.

### Characterization of ketone **27**:

**Physical state:** pale yellow oil;

**TLC:**  $R_f = 0.28$  (silica gel, *c*-Hex:EtOAc = 9:1);

**Optical rotation:**  $[\alpha]_D^{20} = -22$  ( $c = 0.6$ , CHCl<sub>3</sub>);

**FT-IR (ATR):**  $\nu_{\max} = 2988, 2936, 2874, 2833, 1700, 1609, 1589, 1498, 1462, 1426, 1382, 1351, 1313, 1222, 1179, 1159, 1122, 1091, 1048, 1027, 946, 918, 874, 801, 716, 624, 590, 558, 533$  cm<sup>-1</sup>;

**<sup>1</sup>H NMR (500 MHz, CDCl<sub>3</sub>):**  $\delta = 6.74\text{--}6.71$  (m, 1H), 6.71–6.67 (m, 2H), 3.73 (s, 3H), 3.69 (s, 3H), 3.17 (d,  $J = 13.6$  Hz, 1H), 2.90 (d,  $J = 13.6$  Hz, 1H), 2.73 (ddd,  $J = 14.5, 9.8, 6.5$  Hz, 1H), 2.33 (dt,  $J = 14.5, 5.8$  Hz, 1H), 2.09 (ddt,  $J = 13.7, 9.0, 4.4$  Hz, 1H), 1.98 (td,  $J = 6.8, 4.1$  Hz, 1H), 1.88 (dtt,  $J =$

14.5, 9.4, 4.1 Hz, 1H), 1.82–1.75 (m, 1H), 1.49 (ddd,  $J = 13.3, 11.1, 6.5$  Hz, 1H), 0.91 (d,  $J = 7.0$  Hz, 3H), 0.89 (s, 3H) ppm;

$^{13}\text{C}$  NMR (126 MHz,  $\text{CDCl}_3$ ):  $\delta = 216.2, 153.1, 152.3, 128.2, 118.5, 111.8, 111.2, 55.7, 55.5, 53.6, 40.2, 38.4, 37.2, 28.7, 23.0, 18.9, 16.4$  ppm;

HRMS (ESI): calcd for  $\text{C}_{17}\text{H}_{24}\text{O}_3^+$   $[\text{M}+\text{H}]^+$  277.17982, found 277.18007.

### Chiral HPLC traces:

Racemate

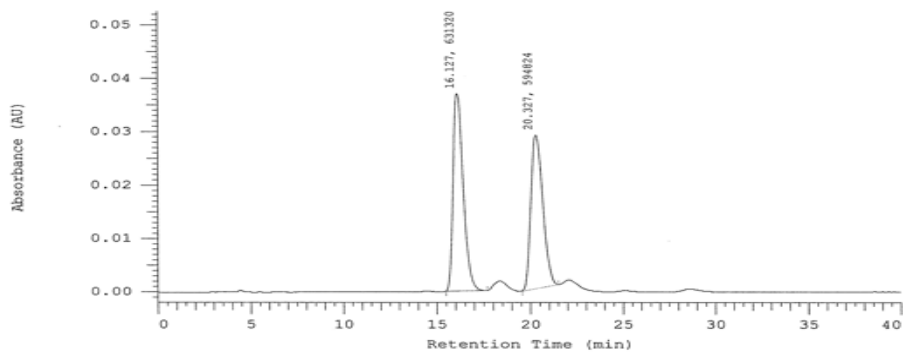

Sample of ketone **27**

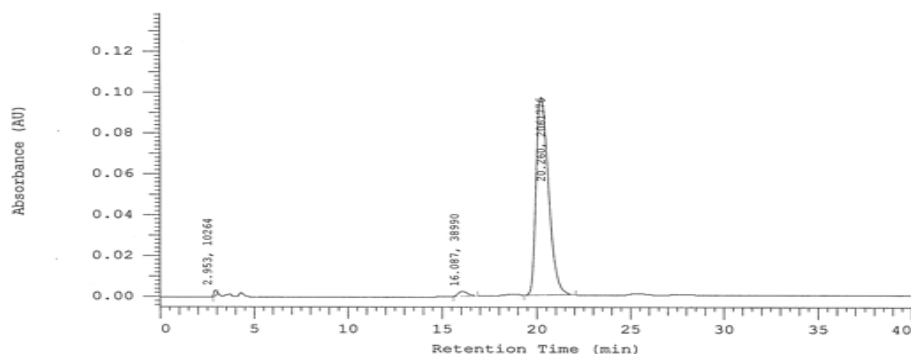

| Sample                     | Peak area<br>( $t = 16.1$ min) | Peak area<br>( $t = 20.3$ min) | ee <sup>a</sup> |
|----------------------------|--------------------------------|--------------------------------|-----------------|
| Racemate                   | 51.5%                          | 48.5%                          | 3.0%            |
| Sample of ketone <b>27</b> | 1.9%                           | 98.1%                          | 96.2%           |

<sup>a</sup>The ee values were determined by Chiral HPLC (column: CHIRALPAK AD-H),  $n$ -hexane: $i$ -PrOH = 99:1, temperature: 18 °C, flow rate: 1 mL/min, detector wavelength: 250 nm).

### Preparation of enol ether **S2**<sup>2</sup>:



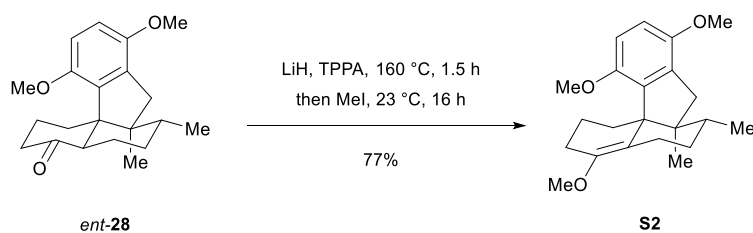

In a flame-dried *Schlenk* flask, ketone *ent-28* (194 mg, 0.590 mmol, 1.00 equiv.) was dissolved in TPPA (2.8 mL). LiH (107 mg, 13.5 mmol, 23.1 equiv.) was added and the stirred suspension was heated to 160 °C for 1.5 h. Then the mixture was cooled to 0 °C and MeI (1.73 g, 760  $\mu\text{L}$ , 12.2 mmol, 20.9 equiv.) was added. The mixture was allowed to reach 23 °C and stirred for 16 h, before excess LiH was carefully quenched by addition of 25% aqueous  $\text{NH}_4\text{OH}$  (5 mL). After addition of  $\text{H}_2\text{O}$  (60 mL) and extraction with MTBE ( $3 \times 40$  mL) the combined organic phases were dried over  $\text{MgSO}_4$  and the solvent was removed under reduced pressure. The crude product was purified by silica gel column chromatography (*c*-Hex/EtOAc 20:1) to provide enol ether **S2** (155 mg, 0.453 mmol, 77%).

### Characterization of enol ether **S2**:

**Physical state:** colorless, crystalline solid;

**M.P.:** 78–80 °C;

**TLC:**  $R_f = 0.64$  (silica gel, *c*-Hex:EtOAc = 9:1);

**Optical rotation:**  $[\alpha]_D^{20} = +152$  ( $c = 0.5$ ,  $\text{CHCl}_3$ );

**FT-IR (ATR):**  $\nu_{\text{max}} = 2930, 2909, 2874, 2850, 2830, 1708, 1673, 1595, 1491, 1462, 1437, 1380, 1360, 1326, 1305, 1282, 1253, 1208, 1170, 1149, 1125, 1111, 1093, 1070, 1056, 1022, 971, 945, 936, 907, 871, 854, 789, 737, 715, 666, 646, 518 \text{ cm}^{-1}$ ;

**$^1\text{H NMR}$  (500 MHz,  $\text{CDCl}_3$ ):**  $\delta = 6.62$  (s, 2H), 3.77 (s, 3H), 3.66 (s, 3H), 3.53 (s, 3H), 2.89 (dt,  $J = 13.6, 3.2$  Hz, 1H), 2.83 (d,  $J = 15.8$  Hz, 1H), 2.51 (d,  $J = 15.8$  Hz, 1H), 2.20–2.10 (m, 2H), 1.84 (ddd,  $J = 13.2, 10.0, 3.6$  Hz, 1H), 1.70–1.59 (m, 2H), 1.49 (tq,  $J = 13.6, 2.9$  Hz, 1H), 1.41–1.37 (m, 2H), 1.33 (dt,  $J = 12.8, 3.5$  Hz, 1H), 1.11 (qd,  $J = 12.7, 3.6$  Hz, 1H), 0.97 (s, 3H), 0.82 (d,  $J = 6.7$  Hz, 3H) ppm;

**$^{13}\text{C NMR}$  (126 MHz,  $\text{CDCl}_3$ ):**  $\delta = 151.7, 150.8, 149.0, 140.7, 131.7, 120.3, 109.9, 108.8, 56.8, 55.8, 55.7, 55.6, 51.7, 38.5, 36.0, 32.2, 31.0, 25.7, 24.1, 20.1, 18.2, 14.1$  ppm;

**HRMS (ESI):** calcd for  $\text{C}_{22}\text{H}_{31}\text{O}_3^+$   $[\text{M}+\text{H}]^+$  343.22677, found 343.22754.

### Preparation of cyclopropane *ent-29*<sup>2</sup>:

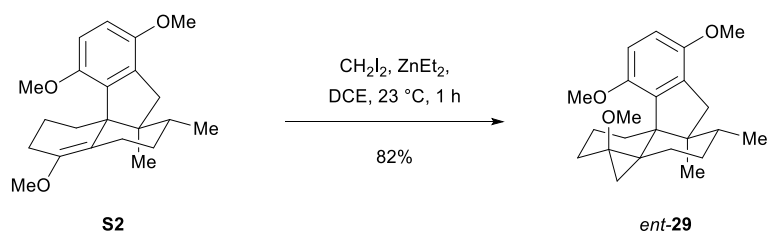

In an argon-flushed flask, enol ether **S2** (155 mg, 0.453 mmol, 1.00 equiv.) was dissolved in DCE (9.8 mL). The solution was cooled to 0 °C and ZnEt<sub>2</sub> (1.80 mL, 1.62 mmol, 3.58 equiv., 0.9 M in hexane) was added slowly. Then CH<sub>2</sub>I<sub>2</sub> (1.0 g, 0.30 mL, 3.7 mmol, 8.2 equiv.) was added and the arising milk-like suspension was allowed to reach 23 °C and stirred for 1 h. Excess reagent was quenched with sat. aqueous NaHCO<sub>3</sub> (3 mL). After addition of H<sub>2</sub>O (35 mL) and extraction with MTBE (3 × 25 mL) the combined organic phases were dried over MgSO<sub>4</sub> and the solvent was removed under reduced pressure. The crude product was purified by silica gel column chromatography (*c*-Hex/EtOAc 50:1) to provide cyclopropane *ent-29* (132 mg, 0.370 mmol, 82%) as a colorless sticky oil, crystallizing upon repetitive dissolving in CH<sub>2</sub>Cl<sub>2</sub> and solvent removal *in vacuo*.

### Characterization of cyclopropane *ent-29*:

**Physical state:** colorless, crystalline solid;

**M.P.:** 87–90 °C;

**TLC:**  $R_f = 0.37$  (silica gel, *c*-Hex:EtOAc = 19:1);

**Optical rotation:**  $[\alpha]_D^{20} = +30$  ( $c = 1.0$ , CHCl<sub>3</sub>);

**FT-IR (ATR):**  $\nu_{\text{max}} = 3061, 2991, 2931, 2902, 2874, 2847, 2829, 1595, 1492, 1459, 1437, 1379, 1353, 1324, 1300, 1282, 1255, 1214, 1201, 1174, 1160, 1135, 1097, 1081, 1049, 1016, 998, 985, 970, 951, 915, 886, 838, 822, 789, 759, 738, 716, 649, 635, 510\text{ cm}^{-1}$ ;

**<sup>1</sup>H NMR (500 MHz, CDCl<sub>3</sub>):**  $\delta = 6.65$  (s, 2H), 3.78 (s, 3H), 3.77 (s, 3H), 3.32 (s, 3H), 2.72 (d,  $J = 15.7$  Hz, 1H), 2.44 (d,  $J = 15.7$  Hz, 1H), 2.08–2.01 (m, 2H), 1.56–1.50 (m, 1H), 1.39–1.33 (m, 6H), 1.27–1.25 (m, 1H), 1.12 (dd,  $J = 9.4, 3.2$  Hz, 1H), 1.00 (s, 3H), 0.82 (d,  $J = 6.0$  Hz, 3H), 0.65 (dd,  $J = 5.1, 1.7$  Hz, 1H), 0.41 (d,  $J = 4.3$  Hz, 1H) ppm;

**<sup>13</sup>C NMR (126 MHz, CDCl<sub>3</sub>):**  $\delta = 152.4, 151.1, 139.0, 132.1, 109.0, 108.9, 65.1, 55.8, 55.5, 54.7, 53.8, 50.9, 38.5, 36.1, 32.3, 30.4, 29.0, 27.9, 27.5, 21.3, 18.2, 17.1, 14.0$  ppm;

**HRMS (ESI):** calcd for C<sub>23</sub>H<sub>32</sub>O<sub>3</sub>Na<sup>+</sup>  $[M+\text{Na}]^+$  379.22437, found 379.22467.

### Preparation of ketone *ent-30*<sup>2</sup>:

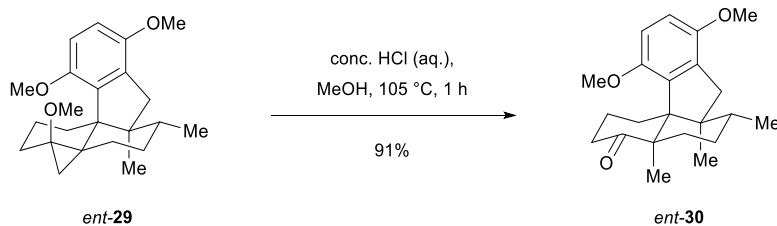

In an argon-flushed flask, cyclopropane *ent-29* (132 mg, 0.370 mmol, 1.00 equiv.) was dissolved in MeOH (4.5 mL) under gentle warming, HCl (conc., aq., 4.0 mL) was added and the mixture was refluxed for 1 h. The solution was allowed to cool to 23 °C before it was neutralized with sat. aqueous NaHCO<sub>3</sub> (20 mL). The aqueous phase was extracted with MTBE (3 × 40 mL), the combined organic phases were dried over MgSO<sub>4</sub> and the solvent was removed under reduced pressure to provide ketone *ent-30* (115 mg, 0.336 mmol, 91%).

### Characterization of ketone *ent-30*

**Physical state:** colorless, crystalline solid;

**M.P.:** 125–128 °C;

**TLC:**  $R_f = 0.24$  (silica gel, *c*-Hex:EtOAc = 9:1);

**Optical rotation:**  $[\alpha]_D^{20} = +0$  ( $c = 0.5$ , CHCl<sub>3</sub>);

**FT-IR (ATR):**  $\nu_{\text{max}} = 3028, 2935, 2881, 2833, 1701, 1595, 1493, 1460, 1415, 1386, 1347, 1321, 1277, 1256, 1194, 1172, 1151, 1128, 1115, 1091, 1065, 1056, 1045, 1023, 1005, 974, 957, 927, 853, 827, 798, 720, 676, 648, 578, 560, 523 \text{ cm}^{-1}$ ;

**<sup>1</sup>H NMR (500 MHz, CDCl<sub>3</sub>):**  $\delta = 6.64$  (d,  $J = 8.7$  Hz, 1H), 6.59 (d,  $J = 8.7$  Hz, 1H), 3.76 (s, 3H), 3.55 (s, 3H), 2.72 (d,  $J = 15.9$  Hz, 1H), 2.55–2.47 (m, 1H), 2.51 (d,  $J = 15.9$  Hz, 1H), 2.27 (dd,  $J = 17.1, 6.0$  Hz, 1H), 2.17 (td,  $J = 13.4, 4.2$  Hz, 1H), 1.97–1.91 (m, 1H), 1.75–1.69 (m, 1H), 1.56–1.48 (m, 1H), 1.45–1.37 (m, 4H), 1.37–1.33 (m, 1H), 1.31 (s, 3H), 1.15 (s, 3H), 0.84 (d,  $J = 6.5$  Hz, 3H) ppm;

**<sup>13</sup>C NMR (126 MHz, CDCl<sub>3</sub>):**  $\delta = 212.2, 151.4, 151.1, 138.3, 131.7, 109.20, 109.18, 59.7, 55.7, 53.2, 50.7, 50.3, 40.1, 36.4, 35.1, 28.8, 27.3, 27.2, 22.8, 20.7, 17.7, 17.4$  ppm;

**HRMS (ESI):** calcd for C<sub>22</sub>H<sub>31</sub>O<sub>3</sub><sup>+</sup> [M+H]<sup>+</sup> 343.22677, found 343.22720.

### Preparation of enol triflate S3<sup>2</sup>:

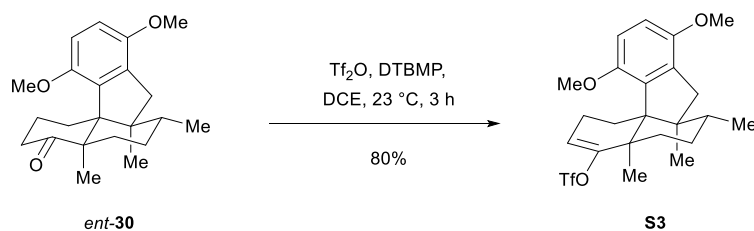

In a flame-dried *Schlenk* flask, ketone *ent-30* (115 mg, 0.336 mmol, 1.00 equiv.) was dissolved in DCE (1.6 mL). After the addition of DTBMP (196 mg, 0.955 mmol, 2.84 equiv.), the solution was cooled to 0 °C and  $\text{Tf}_2\text{O}$  (202 mg, 120  $\mu\text{L}$ , 0.717 mmol, 2.13 equiv.) was added. The arising suspension was allowed to reach 23 °C and stirred for 3 h. After quenching with sat. aqueous  $\text{NaHCO}_3$  (2 mL) and addition of  $\text{H}_2\text{O}$  (25 mL), the aqueous phase was extracted with MTBE ( $3 \times 25$  mL). The combined organic phases were dried over  $\text{MgSO}_4$  and the solvent was removed under reduced pressure. Purification of the crude product by silica gel column chromatography (*c*-Hex/EtOAc 50:1) afforded enol triflate **S3** (127 mg, 0.268 mmol, 80%).

### Characterization of enol triflate **S3**:

**Physical state:** colorless, viscous oil;

**TLC:**  $R_f = 0.80$  (silica gel, *c*-Hex:EtOAc = 9:1);

**Optical rotation:**  $[\alpha]_D^{20} = +0.5$  ( $c = 0.5$ ,  $\text{CHCl}_3$ );

**FT-IR (ATR):**  $\nu_{\text{max}} = 3025, 2956, 2913, 2836, 1683, 1586, 1491, 1463, 1439, 1407, 1345, 1313, 1256, 1208, 1177, 1144, 1079, 1063, 1041, 1023, 1000, 981, 944, 910, 885, 792, 740, 720, 687, 652, 616, 600, 516 \text{ cm}^{-1}$ ;

**$^1\text{H}$  NMR (500 MHz,  $\text{CDCl}_3$ ):**  $\delta = 6.66$  (s, 2H), 5.38 (t,  $J = 3.9$  Hz, 1H), 3.77 (s, 3H), 3.66 (s, 3H), 2.67 (d,  $J = 16.2$  Hz, 1H), 2.57 (d,  $J = 16.2$  Hz, 1H), 2.13–2.02 (m, 2H), 1.81–1.74 (m, 1H), 1.74–1.67 (m, 1H), 1.60–1.55 (m, 1H), 1.50–1.44 (m, 1H), 1.42–1.34 (m, 3H), 1.40 (s, 3H), 1.10 (s, 3H), 0.81 (d,  $J = 6.0$  Hz, 3H) ppm;

**$^{13}\text{C}$  NMR (126 MHz,  $\text{CDCl}_3$ ):**  $\delta = 157.3, 151.8, 151.1, 137.7, 131.6, 118.6$  (q,  $J = 319.2$  Hz), 110.5, 110.0, 109.5, 61.4, 55.7, 55.1, 49.5, 40.2, 40.1, 34.5, 28.9, 27.3, 25.2, 23.6, 22.1, 17.4, 17.0 ppm;

**$^{19}\text{F}$  NMR (471 MHz,  $\text{CDCl}_3$ ):**  $\delta = -75.1$  ppm;

**HRMS (ESI):** calcd for  $\text{C}_{23}\text{H}_{29}\text{F}_3\text{O}_5\text{Na}^+$   $[\text{M}+\text{Na}]^+$  497.15800, found 497.15874.

### Preparation of dimethyl predysiherbol *ent-14* from enol triflate **S3**<sup>2</sup>:

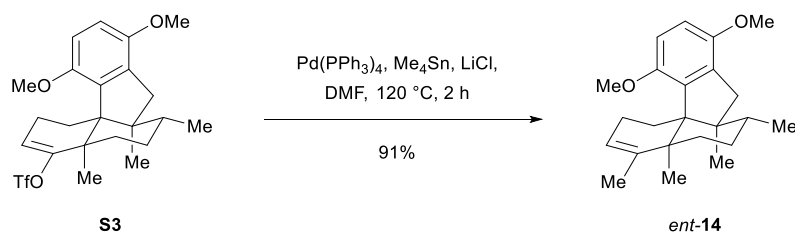

In a flame-dried *Schlenk* flask, enol triflate **S3** (123 mg, 0.259 mmol, 1.00 equiv.) was dissolved in DMF (2 mL). LiCl (57 mg, 1.3 mmol, 5.0 equiv.), Pd(PPh<sub>3</sub>)<sub>4</sub> (62 mg, 0.054 mmol, 0.21 equiv.) and SnMe<sub>4</sub> (95 mg, 74 μL, 0.53 mmol, 2.0 equiv.) were added and the reaction mixture was heated to 120 °C for 2 h. After cooling to 23 °C, the excess reagent was quenched with sat. aqueous NH<sub>4</sub>Cl (10 mL) and the aqueous phase was extracted with EtOAc (3 × 10 mL). The combined organic phases were washed with brine (10 mL), dried over MgSO<sub>4</sub>, and the solvent was removed under reduced pressure. Purification of the crude product by silica gel column chromatography (*c*-Hex/toluene 5:1) afforded dimethyl predysiherbol *ent*-**14** (80.0 mg, 0.235 mmol, 91%).

#### Characterization of dimethyl predysiherbol *ent*-**14**:

**Physical state:** colorless, viscous oil;

**TLC:**  $R_f = 0.41$  (silica gel, *c*-Hex:EtOAc = 4:1);

**Optical rotation:**  $[\alpha]_D^{20} = -24$  ( $c = 0.4$ , CHCl<sub>3</sub>);

**FT-IR (ATR):**  $\nu_{\text{max}} = 3014, 2940, 2909, 2831, 1585, 1489, 1463, 1450, 1437, 1385, 1377, 1314, 1254, 1176, 1162, 1149, 1123, 1090, 1074, 1045, 1035, 1017, 997, 988, 969, 904, 878, 790, 742, 720, 663, 651, 515 \text{ cm}^{-1}$ ;

**<sup>1</sup>H NMR (500 MHz, CDCl<sub>3</sub>):**  $\delta = 6.66$  (d,  $J = 8.8$  Hz, 1H), 6.63 (d,  $J = 8.8$  Hz, 1H), 5.04 (s, 1H), 3.76 (s, 3H), 3.62 (s, 3H), 2.62 (d,  $J = 16.1$  Hz, 1H), 2.57 (d,  $J = 16.1$  Hz, 1H), 2.10 (td,  $J = 12.5, 6.1$  Hz, 1H), 1.93–1.85 (m, 1H), 1.72–1.66 (m, 1H), 1.69–1.67 (m, 3H), 1.60–1.54 (m, 1H), 1.54–1.49 (m, 1H), 1.49–1.43 (m, 1H), 1.42–1.37 (m, 2H), 1.35–1.29 (m, 1H), 1.24 (s, 3H), 1.10 (s, 3H), 0.79 (d,  $J = 6.4$  Hz, 3H) ppm;

**<sup>13</sup>C NMR (126 MHz, CDCl<sub>3</sub>):**  $\delta = 152.4, 151.0, 144.9, 140.3, 131.9, 116.2, 111.4, 108.9, 60.1, 55.6, 55.6, 49.4, 40.0, 39.2, 34.7, 30.8, 27.9, 26.1, 24.0, 23.9, 19.2, 17.5, 17.0$  ppm;

**HRMS (ESI):** calcd for C<sub>23</sub>H<sub>33</sub>O<sub>2</sub><sup>+</sup> [M+H]<sup>+</sup> 341.24751, found 341.24774.

#### Preparation of dysiherbol A methyl ether **31** from dimethyl predysiherbol **14** with BBr<sub>3</sub><sup>3</sup>:

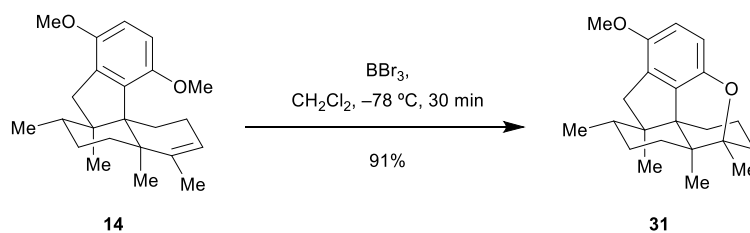

To a stirred solution of dimethyl predysiherbol **14** (25.6 mg, 75.2  $\mu\text{mol}$ , 1.0 equiv.) in  $\text{CH}_2\text{Cl}_2$  (2 mL) was added  $\text{BBr}_3$  (150  $\mu\text{L}$ , 150  $\mu\text{mol}$ , 1.0 M in  $\text{CH}_2\text{Cl}_2$ , 2.0 equiv.) at  $-78\text{ }^\circ\text{C}$ . The resulting mixture was stirred at this temperature for 30 min before it was quenched with saturated aqueous  $\text{NaHCO}_3$  (10 mL) and extracted with  $\text{CH}_2\text{Cl}_2$  ( $3 \times 5\text{ mL}$ ). The combined organic layers were washed with brine (5 mL) and dried over anhydrous  $\text{Na}_2\text{SO}_4$ . After filtration and evaporation of the solvent, the residue was purified by flash column chromatography (silica gel, petroleum ether:EtOAc = 100:1) to give dysiherbol A methyl ether **31** (22.3 mg, 68.4  $\mu\text{mol}$ , 91%).

### Characterization of dysiherbol A methyl ether **31**:

**Physical state:** colorless oil;

**TLC:**  $R_f = 0.38$  (silica gel, petroleum ether:EtOAc = 50:1);

**Optical rotation:**  $[\alpha]_D^{23} = +22.4$  ( $c = 1.0$ ,  $\text{CHCl}_3$ );

**FT-IR (KBr):**  $\nu_{\text{max}} = 3431, 2934, 2360, 2338, 1734, 1716, 1635, 1540, 1457, 1383, 1183, 1106, 1031\text{ cm}^{-1}$ ;

**$^1\text{H NMR}$  (400 MHz,  $\text{C}_6\text{D}_6$ ):**  $\delta = 6.78$  (d,  $J = 8.6\text{ Hz}$ , 1H), 6.44 (d,  $J = 8.6\text{ Hz}$ , 1H), 3.43 (s, 3H), 2.85 (d,  $J = 15.4\text{ Hz}$ , 1H), 2.66 (d,  $J = 15.4\text{ Hz}$ , 1H), 1.78–1.67 (m, 2H), 1.64–1.54 (m, 1H), 1.54–1.41 (m, 2H), 1.36–1.27 (m, 2H), 1.27–1.22 (m, 2H), 1.21 (s, 3H), 1.19–1.10 (m, 1H), 1.04 (dq,  $J = 13.6, 3.5\text{ Hz}$ , 1H), 0.93 (s, 3H), 0.91 (s, 3H), 0.71 (d,  $J = 6.8\text{ Hz}$ , 3H) ppm;

**$^{13}\text{C NMR}$  (101 MHz,  $\text{C}_6\text{D}_6$ ):**  $\delta = 150.9, 149.2, 133.6, 128.3, 111.1, 110.6, 82.2, 55.4, 51.7, 49.4, 40.6, 37.5, 36.1, 35.8, 30.3, 26.8, 26.7, 22.3, 20.2, 18.5, 17.9, 15.0\text{ ppm}$ ;

**HRMS (ESI-TOF):** calcd for  $\text{C}_{22}\text{H}_{31}\text{O}_2^+$   $[\text{M}+\text{H}]^+$  327.2319, found 327.2319.

### Preparation of dysiherbol A (**6**) from dysiherbol A methyl ether **31**:

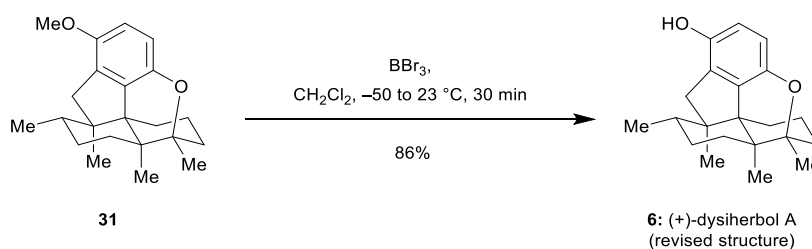

To a stirred solution of dysiherbol A methyl ether **31** (10.2 mg, 31.2  $\mu\text{mol}$ , 1.0 equiv.) in  $\text{CH}_2\text{Cl}_2$  (2 mL) was added  $\text{BBr}_3$  (156  $\mu\text{L}$ , 156  $\mu\text{mol}$ , 1.0 M in  $\text{CH}_2\text{Cl}_2$ , 5.0 equiv.) at  $-50\text{ }^\circ\text{C}$ . The resulting mixture was allowed to warm to  $23\text{ }^\circ\text{C}$  and stirred at this temperature for 30 min. The reaction mixture was quenched with saturated aqueous  $\text{NaHCO}_3$  (10 mL) and extracted with  $\text{CH}_2\text{Cl}_2$  ( $3 \times 5\text{ mL}$ ). The combined organic layers were washed with brine (5 mL), dried over anhydrous  $\text{Na}_2\text{SO}_4$ , filtered, and concentrated under reduced pressure. The crude product was purified by flash column chromatography (silica gel, petroleum ether:EtOAc = 25:1) to give dysiherbol A (**6**) (8.4 mg, 26.9  $\mu\text{mol}$ , 86%).

### Characterization of dysiherbol A (**6**):

**Physical state:** pale yellow oil;

**TLC:**  $R_f = 0.49$  (silica gel, petroleum ether:EtOAc = 5:1);

**Optical rotation:**  $[\alpha]_D^{23} = +22.9$  ( $c = 1.0$ , MeOH);

**FT-IR (KBr):**  $\nu_{\text{max}} = 3307, 2949, 2870, 1491, 1462, 1380, 1263, 1184, 1105, 959, 938, 868, 800\text{ cm}^{-1}$ ;

**$^1\text{H}$  NMR (400 MHz,  $\text{CDCl}_3$ ):**  $\delta = 6.49$  (d,  $J = 8.5\text{ Hz}$ , 1H), 6.42 (d,  $J = 8.5\text{ Hz}$ , 1H), 4.24 (s, 1H), 2.57 (d,  $J = 15.4\text{ Hz}$ , 1H), 2.53 (d,  $J = 15.4\text{ Hz}$ , 1H), 1.96 (td,  $J = 13.9, 6.5\text{ Hz}$ , 1H), 1.84 (td,  $J = 12.8, 4.6\text{ Hz}$ , 1H), 1.68 (dd,  $J = 15.0, 5.8\text{ Hz}$ , 1H), 1.54–1.46 (m, 1H), 1.42–1.37 (m, 1H), 1.37–1.33 (m, 1H), 1.34–1.32 (m, 1H), 1.32–1.30 (m, 1H), 1.30–1.27 (m, 1H), 1.26–1.23 (m, 1H), 1.23–1.22 (m, 1H), 1.22 (s, 3H), 1.21 (s, 3H), 1.08 (s, 3H), 0.83 (d,  $J = 6.5\text{ Hz}$ , 3H) ppm;

**$^{13}\text{C}$  NMR (101 MHz,  $\text{CDCl}_3$ ):**  $\delta = 148.5, 145.7, 133.2, 126.0, 114.4, 111.2, 82.5, 52.0, 49.3, 39.5, 37.4, 35.8, 35.6, 30.1, 26.6, 26.5, 22.1, 19.9, 18.6, 17.9, 15.0\text{ ppm}$ ;

**HRMS (ESI-TOF):** calcd for  $\text{C}_{21}\text{H}_{29}\text{O}_2^+$   $[\text{M}+\text{H}]^+$  313.2162, found 313.2162.

### Preparation of dysiherbol A (**6**) directly from dimethyl predysiherbol **14**:

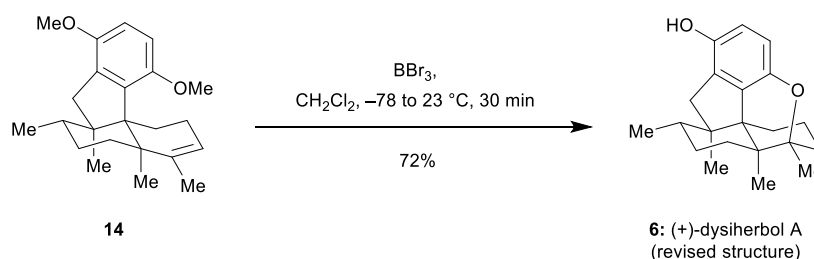

To a stirred solution of dimethyl predysiherbol **14** (15.6 mg, 45.8  $\mu\text{mol}$ , 1.0 equiv.) in  $\text{CH}_2\text{Cl}_2$  (2 mL) was added  $\text{BBr}_3$  (229  $\mu\text{L}$ , 229  $\mu\text{mol}$ , 1.0 M in  $\text{CH}_2\text{Cl}_2$ , 5.0 equiv.) at  $-78\text{ }^\circ\text{C}$ . The resulting mixture

was allowed to warm to 23 °C gradually and stirred at this temperature for 30 min. The reaction mixture was quenched with saturated aqueous NaHCO<sub>3</sub> (10 mL) and extracted with CH<sub>2</sub>Cl<sub>2</sub> (3 × 5 mL). The combined organic layers were washed with brine (5 mL), dried over anhydrous Na<sub>2</sub>SO<sub>4</sub>, filtered, and concentrated under reduced pressure. The crude product was purified by flash column chromatography (silica gel, petroleum ether:EtOAc = 25:1) to give dysiherbol A (**6**) (10.3 mg, 33.0 μmol, 72%).

The analytical data of dysiherbol A (**6**) was described above.

### Preparation of allylic alcohol **32** from dimethyl predysiherbol **14**:

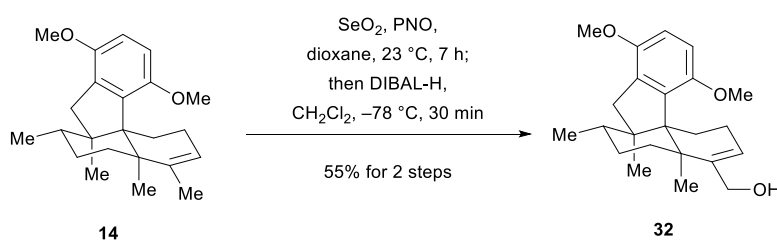

To a stirred solution of dimethyl predysiherbol **14** (4.6 mg, 13.5 μmol, 1.0 equiv.) in dioxane (1 mL) was added PNO (5.1 mg, 54.0 μmol, 4.0 equiv.) and SeO<sub>2</sub> (1.5 mg, 13.5 μmol, 1.0 equiv.) at 23 °C. The resulting mixture was stirred at this temperature for 7 h. The reaction mixture was diluted with saturated aqueous NaHCO<sub>3</sub> (5 mL) and extracted with EtOAc (3 × 5 mL). The combined organic layers were washed with brine (5 mL), dried over anhydrous Na<sub>2</sub>SO<sub>4</sub>, filtered, and concentrated under reduced pressure. The crude product was used to the next step without further purification.

To a stirred solution of the resulting crude product in CH<sub>2</sub>Cl<sub>2</sub> (1 mL) was added DIBAL-H (27.0 μL, 27.0 μmol, 1.0 M in toluene, 2.0 equiv.) at -78 °C. The resulting mixture was stirred at this temperature for 30 min. The reaction mixture was quenched with saturated aqueous Na<sub>2</sub>S<sub>2</sub>O<sub>3</sub> (5 mL) and saturated aqueous NaHCO<sub>3</sub> (5 mL) and extracted with CH<sub>2</sub>Cl<sub>2</sub> (3 × 5 mL). The combined organic layers were washed with brine (5 mL), dried over anhydrous Na<sub>2</sub>SO<sub>4</sub>, filtered, and concentrated under reduced pressure. The crude product was purified by flash column chromatography (silica gel, petroleum ether:EtOAc = 15:1→10:1) to give allylic alcohol **32** (2.6 mg, 7.43 μmol, 55%).

### Characterization of allylic alcohol **32**:

**Physical state:** white foam;



**TLC:**  $R_f = 0.48$  (silica gel, petroleum ether:EtOAc = 3:1);

**Optical rotation:**  $[\alpha]_D^{23} = +17.1$  ( $c = 1.0$ ,  $\text{CHCl}_3$ );

**FT-IR (KBr):**  $\nu_{\text{max}} = 3854, 3820, 3748, 3673, 3566, 2940, 1747, 1716, 1700, 1650, 1541, 1490, 1457, 1421, 1385, 1254 \text{ cm}^{-1}$ ;

**$^1\text{H}$  NMR (400 MHz,  $\text{C}_6\text{D}_6$ ):**  $\delta = 6.54$  (d,  $J = 8.8$  Hz, 1H), 6.46 (d,  $J = 8.8$  Hz, 1H), 5.42 (t,  $J = 3.4$  Hz, 1H), 4.24 (d,  $J = 12.8$  Hz, 1H), 4.17 (d,  $J = 12.8$  Hz, 1H), 3.41 (s, 3H), 3.37 (s, 3H), 2.93 (d,  $J = 16.2$  Hz, 1H), 2.72 (d,  $J = 16.2$  Hz, 1H), 1.96 (m, 3H), 1.75 (ddt,  $J = 15.0, 6.0, 2.6$  Hz, 1H), 1.67 (dt,  $J = 12.9, 3.5$  Hz, 1H), 1.53 (ddd,  $J = 12.0, 6.7, 4.9$  Hz, 1H), 1.40 (tdd,  $J = 13.3, 10.9, 3.3$  Hz, 2H), 1.28 (s, 3H), 1.23 (dq,  $J = 12.0, 3.9$  Hz, 1H), 1.02 (s, 3H), 0.73 (d,  $J = 6.7$  Hz, 3H) ppm;

**$^{13}\text{C}$  NMR (101 MHz,  $\text{C}_6\text{D}_6$ ):**  $\delta = 152.6, 151.9, 147.5, 140.0, 132.1, 117.6, 112.2, 109.2, 64.4, 60.7, 55.6, 55.0, 49.6, 40.7, 39.0, 34.9, 30.8, 28.0, 26.2, 25.5, 24.0, 17.5, 17.4$  ppm;

**HRMS (ESI-TOF):** calcd for  $\text{C}_{23}\text{H}_{32}\text{O}_3\text{Na}^+$   $[\text{M}+\text{Na}]^+$  379.2244, found 379.2241.

### Preparation of methyl ester *ent*-33<sup>2</sup>:

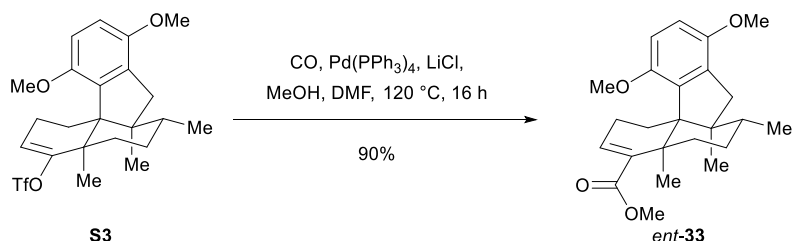

To a solution of triflate **S3** (10 mg, 0.021 mmol, 1.0 equiv.) in DMF (0.28 mL) were added Pd(PPh<sub>3</sub>)<sub>4</sub> (11 mg, 9.5  $\mu\text{mol}$ , 0.45 equiv.), LiCl (10 mg, 0.24 mmol, 11 equiv.) and MeOH (0.28 mL). The resulting suspension was degassed in 3 freeze-pump-thaw cycles and stirred under a CO atmosphere at 120 °C for 16 h. The mixture was then allowed to reach room temp. before H<sub>2</sub>O (0.5 mL) and EtOAc (1 mL) were added. The aqueous layer was extracted with EtOAc (3  $\times$  1 mL) and the combined organic phases were dried over MgSO<sub>4</sub> before the solvent was removed under reduced pressure. The crude product was purified by silica gel column chromatography (petroleum ether:EtOAc = 100:1 $\rightarrow$ 50:1) to provide *ent*-33 (7.3 mg, 0.019 mmol, 90%).

### Characterization of methyl ester *ent*-33:

**Physical state:** pale yellow, viscous oil;

**TLC:**  $R_f = 0.20$  (silica gel, *c*-Hex:EtOAc = 20:1);

**Optical rotation:**  $[\alpha]_D^{20} = -14$  ( $c = 0.48$ ,  $\text{CHCl}_3$ );

**FT-IR (ATR):**  $\nu_{\max}$  = 3019, 2947, 2858, 2831, 1709, 1638, 1586, 1488, 1461, 1436, 1385, 1377, 1355, 1315, 1291, 1253, 1224, 1174, 1158, 1126, 1081, 1061, 1036, 1015, 999, 989, 972, 958, 948, 934, 912, 885, 866, 852, 823, 790, 772, 761, 739, 720, 711, 652, 599, 530, 453  $\text{cm}^{-1}$ ;

**$^1\text{H}$  NMR (500 MHz,  $\text{CDCl}_3$ ):**  $\delta$  = 6.64 (d,  $J$  = 8.8 Hz, 1H), 6.61 (d,  $J$  = 8.9 Hz, 1H), 6.53 (dd,  $J$  = 4.4, 2.6 Hz, 1H), 3.76 (s, 3H), 3.74 (s, 3H), 3.60 (s, 3H), 2.65 (d,  $J$  = 16.1 Hz, 1H), 2.58 (d,  $J$  = 16.2 Hz, 1H), 2.29 (dt,  $J$  = 12.6, 3.2 Hz, 1H), 2.14–2.03 (m, 2H), 1.75–1.65 (m, 1H), 1.58 (qd,  $J$  = 13.2, 3.4 Hz, 1H), 1.52–1.47 (m, 2H), 1.45 (s, 3H), 1.42–1.36 (m, 1H), 1.36–1.34 (m, 1H), 1.11 (s, 3H), 0.80 (d,  $J$  = 6.5 Hz, 3H) ppm;

**$^{13}\text{C}$  NMR (126 MHz,  $\text{CDCl}_3$ ):**  $\delta$  = 168.1, 152.4, 150.9, 141.9, 139.1, 134.0, 131.9, 110.3, 109.1, 60.6, 55.7, 55.5, 51.1, 49.8, 40.3, 38.7, 34.6, 29.7, 28.0, 25.2, 24.9, 24.5, 17.5, 17.3 ppm;

**HRMS (ESI-TOF):** calcd for  $\text{C}_{24}\text{H}_{32}\text{O}_4\text{Na}^+$   $[\text{M}+\text{Na}]^+$  407.2193, found 407.2195.

### Synthesis of alcohol *ent*-32<sup>2</sup>:

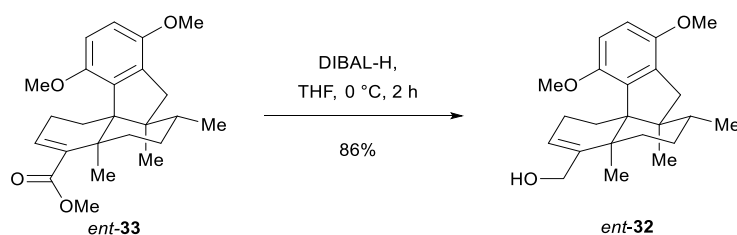

To a solution of ester *ent*-33 (5.3 mg, 0.014 mmol, 1.0 equiv.) in THF (0.16 mL) was added DIBAL-H (85  $\mu\text{L}$ , 0.085 mmol, 6.2 equiv., 1.0 M in hexanes) at 0 °C. The resulting mixture was stirred at this temperature for 2 h. The reaction mixture was quenched with MeOH (0.3 mL), aqueous Rochelle's salt solution (0.3 mL) and extracted with EtOAc ( $3 \times 1$  mL). The combined organic layers were washed with brine (5 mL), dried over anhydrous  $\text{MgSO}_4$ , filtered, and concentrated under reduced pressure. The crude product was used to the next step without further purification. The crude product was purified by silica gel column chromatography (petroleum ether:EtOAc = 20:1 $\rightarrow$ 9:1) to provide *ent*-32 (4.1 mg, 0.012 mmol, 86%).

### Characterization of allylic alcohol *ent*-32:

**Physical state:** colorless, viscous oil;

**TLC:**  $R_f$  = 0.081 (silica gel, *c*-Hex:EtOAc = 9:1);

**Optical rotation:**  $[\alpha]_D^{20} = -5$  ( $c$  = 0.37,  $\text{CHCl}_3$ );

**FT-IR (ATR):**  $\nu_{\max}$  = 3674, 3444, 2988, 2954, 2927, 2870, 2832, 2215, 2028, 1987, 1734, 1674, 1489,

1463, 1438, 1383, 1253, 1175, 1149, 1131, 1073, 1065, 1040, 1002, 967, 879, 794, 743, 721, 653, 582, 551, 516  $\text{cm}^{-1}$ ;

**$^1\text{H}$  NMR (600 MHz,  $\text{CDCl}_3$ ):**  $\delta$  = 6.72 (d,  $J$  = 8.8 Hz, 1H), 6.67 (d,  $J$  = 8.8 Hz, 1H), 5.46 (dt,  $J$  = 3.4, 2.1 Hz, 1H), 4.28–4.25 (m, 1H), 4.18–4.14 (m, 1H), 3.79 (s, 3H), 3.67 (s, 3H), 2.68 (d,  $J$  = 16.2 Hz, 1H), 2.59 (d,  $J$  = 16.2 Hz, 1H), 2.14 (td,  $J$  = 12.6, 6.2 Hz, 1H), 2.06–2.01 (m, 1H), 1.76 (td,  $J$  = 13.1, 3.7 Hz, 1H), 1.68–1.65 (m, 2H), 1.52–1.49 (m, 1H), 1.47–1.44 (m, 1H), 1.43–1.40 (m, 1H), 1.38–1.35 (m, 1H), 1.33 (s, 3H), 1.13 (s, 3H), 0.83 (d,  $J$  = 6.5 Hz, 3H) ppm;

**$^{13}\text{C}$  NMR (151 MHz,  $\text{CDCl}_3$ ):**  $\delta$  = 152.3, 151.4, 146.9, 139.8, 132.0, 119.2, 112.2, 109.2, 64.9, 60.6, 56.2, 55.7, 49.5, 40.2, 38.9, 34.7, 30.9, 27.8, 25.9, 25.5, 23.8, 17.5, 17.4 ppm;

**GC-MS (70 eV):**  $m/z$  = 356  $[\text{M}]^+$ , 338, 323, 297, 269, 255, 241, 217, 204, 187, 165, 151, 128, 115, 91, 69, 55.

#### Preparation of dysiherbol E methyl ether **34**:

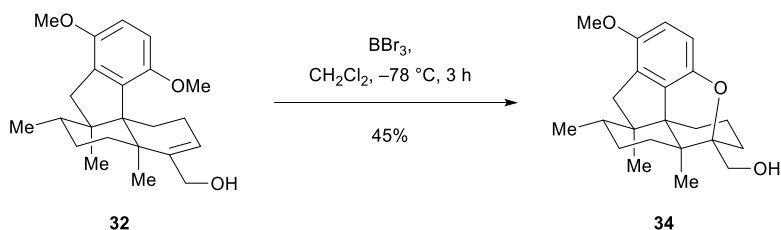

To a stirred solution of allylic alcohol **32** (5.5 mg, 15.4  $\mu\text{mol}$ , 1.0 equiv.) in  $\text{CH}_2\text{Cl}_2$  (1 mL) was added  $\text{BBr}_3$  (18.5  $\mu\text{L}$ , 18.5  $\mu\text{mol}$ , 1.0 M in  $\text{CH}_2\text{Cl}_2$ , 1.2 equiv.) at  $-78$  °C. The resulting mixture was stirred at this temperature for 3 h. The reaction mixture was quenched with saturated aqueous  $\text{NaHCO}_3$  (10 mL) and extracted with  $\text{CH}_2\text{Cl}_2$  ( $3 \times 5$  mL). The combined organic layers were washed with brine (5 mL), dried over anhydrous  $\text{Na}_2\text{SO}_4$ , filtered, and concentrated under reduced pressure. The crude product was purified by flash column chromatography (silica gel, petroleum ether:EtOAc = 6:1→3:1) to give dysiherbol E methyl ether **34** (2.4 mg, 6.93  $\mu\text{mol}$ , 45%).

#### Characterization of dysiherbol E methyl ether **34**

**Physical state:** white foam;

**TLC:**  $R_f$  = 0.37 (silica gel, petroleum ether:EtOAc = 4:1);

**Optical rotation:**  $[\alpha]_D^{23} = +26.7$  ( $c$  = 0.5,  $\text{CHCl}_3$ );

**FT-IR (KBr):**  $\nu_{\text{max}}$  = 3221, 2999, 2939, 2877, 1494, 1452, 1259, 1158, 1107, 1050, 960, 921, 875, 801  $\text{cm}^{-1}$ ;

**<sup>1</sup>H NMR (400 MHz, C<sub>6</sub>D<sub>6</sub>):**  $\delta$  = 6.71 (dd,  $J$  = 8.6, 1.0 Hz, 1H), 6.46 (d,  $J$  = 8.6 Hz, 1H), 3.79 (d,  $J$  = 11.3 Hz, 1H), 3.48–3.40 (m, 1H), 3.44 (s, 3H), 2.82 (d,  $J$  = 15.4 Hz, 1H), 2.62 (dd,  $J$  = 15.5, 1.0 Hz, 1H), 2.15–1.99 (m, 1H), 1.82 (s, 1H), 1.70–1.58 (m, 1H), 1.53 (ddd,  $J$  = 12.4, 10.7, 7.2 Hz, 1H), 1.37 (m, 3H), 1.29–1.13 (m, 3H), 1.12–1.06 (m, 1H), 0.97 (m, 3.7 Hz, 1H), 0.88 (s, 3H), 0.86 (s, 3H), 0.68 (d,  $J$  = 6.8 Hz, 3H) ppm;

**<sup>13</sup>C NMR (101 MHz, C<sub>6</sub>D<sub>6</sub>):**  $\delta$  = 151.2, 148.3, 133.6, 128.6, 111.1, 110.5, 83.9, 65.8, 55.4, 51.8, 49.5, 40.6, 37.1, 35.6, 30.7, 30.2, 26.8, 26.6, 19.6, 18.4, 17.8, 15.0 ppm;

**HRMS (ESI-TOF):** calcd for C<sub>22</sub>H<sub>30</sub>O<sub>3</sub>Na<sup>+</sup> [M+Na]<sup>+</sup> 365.2087, found 365.2084.

### Preparation of dysiherbol E (10) from dysiherbol E methyl ether 34:

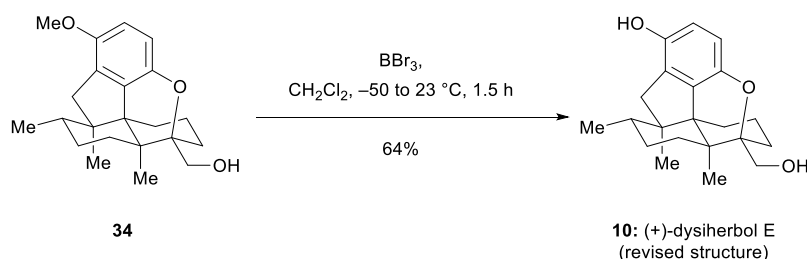

To a stirred solution of dysiherbol B methyl ether **34** (4.6 mg, 13.4  $\mu$ mol, 1.0 equiv.) in CH<sub>2</sub>Cl<sub>2</sub> (1 mL) was added BBr<sub>3</sub> (67.0  $\mu$ L, 67.0  $\mu$ mol, 1.0 M in CH<sub>2</sub>Cl<sub>2</sub>, 5.0 equiv.) at  $-50$  °C. The resulting mixture was allowed to warm to 23 °C and stirred at this temperature for 1.5 h. The reaction mixture was quenched with saturated aqueous NaHCO<sub>3</sub> (10 mL) and extracted with CH<sub>2</sub>Cl<sub>2</sub> (3  $\times$  5 mL). The combined organic layers were washed with brine (5 mL), dried over anhydrous Na<sub>2</sub>SO<sub>4</sub>, filtered, and concentrated under reduced pressure. The crude product was purified by flash column chromatography (silica gel, petroleum ether:EtOAc = 6:1  $\rightarrow$  3:1) to give dysiherbol E (**10**) (2.8 mg, 8.52  $\mu$ mol, 64%).

### Characterization of dysiherbol E (10):

**Physical state:** white foam;

**TLC:**  $R_f$  = 0.41 (silica gel, CH<sub>2</sub>Cl<sub>2</sub>:MeOH = 40:1);

**Optical rotation:**  $[\alpha]_D^{23} = +34.5$  ( $c$  = 0.5, MeOH);

**FT-IR (KBr):**  $\nu_{\max}$  = 3901, 3854, 3820, 3801, 3711, 3615, 3276, 2871, 1772, 1716, 1622, 1492, 1317, 1185, 956, 802 cm<sup>-1</sup>;

**<sup>1</sup>H NMR (400 MHz, CDCl<sub>3</sub>):**  $\delta$  = 6.51 (d,  $J$  = 8.5 Hz, 1H), 6.46 (d,  $J$  = 8.5 Hz, 1H), 4.37 (s, 1H),

3.90 (d,  $J = 11.3$  Hz, 1H), 3.51 (d,  $J = 11.3$  Hz, 1H), 2.56 (s, 2H), 2.06 (s, 1H), 2.00 (dd,  $J = 14.8, 6.1$  Hz, 1H), 1.85 (tdd,  $J = 14.8, 9.5, 5.7$  Hz, 2H), 1.59 (dt,  $J = 12.1, 5.4$  Hz, 2H), 1.44–1.29 (m, 5H), 1.24 (s, 3H), 1.21 (d,  $J = 8.2$  Hz, 2H), 1.08 (s, 3H), 0.82 (d,  $J = 6.4$  Hz, 3H) ppm;

$^{13}\text{C}$  NMR (101 MHz,  $\text{CDCl}_3$ ):  $\delta = 147.7, 146.1, 133.1, 126.2, 114.5, 111.4, 83.6, 65.8, 52.2, 49.4, 39.5, 37.0, 35.4, 30.6, 30.0, 26.6, 26.4, 19.3, 18.6, 17.9, 15.1$  ppm;

HRMS (ESI-TOF): calcd for  $\text{C}_{21}\text{H}_{28}\text{O}_3\text{Na}^+ [\text{M}+\text{Na}]^+$  351.1931, found 351.1928.

### Preparation of dysiherbol E (10) from allylic alcohol 32:

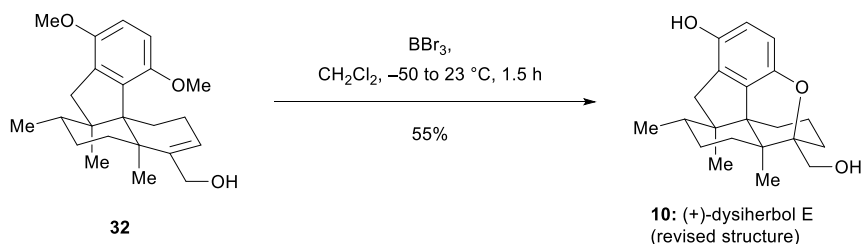

To a stirred solution of allylic alcohol **32** (5.1 mg, 14.3  $\mu\text{mol}$ , 1.0 equiv.) in  $\text{CH}_2\text{Cl}_2$  (1 mL) was added  $\text{BBr}_3$  (71.5  $\mu\text{L}$ , 71.5  $\mu\text{mol}$ , 1.0 M in  $\text{CH}_2\text{Cl}_2$ , 5.0 equiv.) at  $-50$  °C. The resulting mixture was allowed to warm to 23 °C and stirred at this temperature for 1.5 h. The reaction mixture was quenched with saturated aqueous  $\text{NaHCO}_3$  (10 mL) and extracted with  $\text{CH}_2\text{Cl}_2$  ( $3 \times 5$  mL). The combined organic layers were washed with brine (5 mL), dried over anhydrous  $\text{Na}_2\text{SO}_4$ , filtered, and concentrated under reduced pressure. The crude product was purified by flash column chromatography (silica gel, petroleum ether:EtOAc = 6:1  $\rightarrow$  3:1) to give dysiherbol E (**10**) (2.6 mg, 7.86  $\mu\text{mol}$ , 55%).

The analytical data of dysiherbol E (**10**) were described above.

### Preparation of olefin 35<sup>4</sup>:

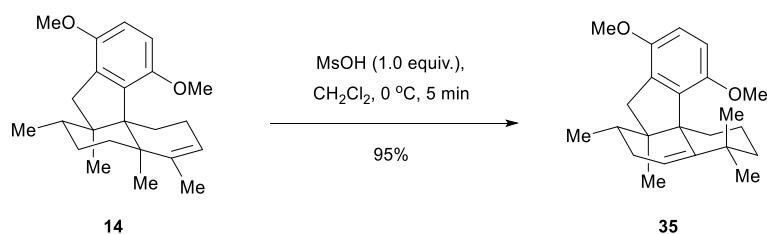

To a stirred solution of dimethyl predysiherbol **14** (15.2 mg, 44.6  $\mu\text{mol}$ , 1.0 equiv.) in  $\text{CH}_2\text{Cl}_2$  (2 mL) was added  $\text{MsOH}$  (4.3 mg, 2.9  $\mu\text{L}$ , 44.6  $\mu\text{mol}$ , 1.0 equiv.) at 0 °C. The resulting mixture was allowed to stir at this temperature for 5 min. The reaction mixture was quenched with saturated aqueous  $\text{NaHCO}_3$  (10 mL) and extracted with  $\text{CH}_2\text{Cl}_2$  ( $3 \times 5$  mL). The combined organic layers were washed

with brine (5 mL), dried over anhydrous Na<sub>2</sub>SO<sub>4</sub>, filtered, and concentrated under reduced pressure. The crude product was purified by flash column chromatography (silica gel, petroleum ether:EtOAc = 100:1) to give olefin **35** (14.4 mg, 42.4 μmol, 95%).

### Characterization of olefin **35**:

**Physical state:** white foam;

**TLC:** *R<sub>f</sub>* = 0.41 (silica gel, petroleum ether:EtOAc = 50:1);

**Optical rotation:**  $[\alpha]_D^{23} = +26.1$  (*c* = 1.0, CHCl<sub>3</sub>);

**FT-IR (KBr):**  $\nu_{\max} = 3801, 3689, 3628, 2953, 2861, 2360, 1651, 1540, 1437, 1397, 1376, 1253, 1112, 830 \text{ cm}^{-1}$ ;

**<sup>1</sup>H NMR (400 MHz, C<sub>6</sub>D<sub>6</sub>):**  $\delta = 6.47$  (d, *J* = 8.8 Hz, 1H), 6.45 (d, *J* = 8.8 Hz, 1H), 5.74 (t, *J* = 3.7 Hz, 1H), 3.44 (s, 3H), 3.32 (s, 3H), 3.16 (d, *J* = 16.1 Hz, 1H), 2.78 (d, *J* = 16.1 Hz, 1H), 2.52–2.39 (m, 1H), 1.98–1.89 (m, 1H), 1.88–1.79 (m, 2H), 1.73–1.60 (m, 2H), 1.59–1.50 (m, 2H), 1.43 (s, 3H), 1.37 (dt, *J* = 14.5, 3.0 Hz, 1H), 1.31 (s, 3H), 0.86 (s, 3H), 0.74 (d, *J* = 6.5 Hz, 3H) ppm;

**<sup>13</sup>C NMR (101 MHz, C<sub>6</sub>D<sub>6</sub>):**  $\delta = 152.1, 151.8, 145.6, 142.6, 131.5, 121.1, 109.7, 108.9, 56.0, 55.2, 54.9, 50.3, 38.3, 37.1, 35.0, 33.1, 32.9, 32.2, 30.7, 27.5, 17.1, 17.0, 12.4$  ppm;

**HRMS (ESI-TOF):** calcd for C<sub>23</sub>H<sub>33</sub>O<sub>2</sub><sup>+</sup> [M+H]<sup>+</sup> 341.2475, found 341.2477.

### Preparation of dysiherbol A methyl ether **31** from dimethyl predysiherbol **14** with MsOH:

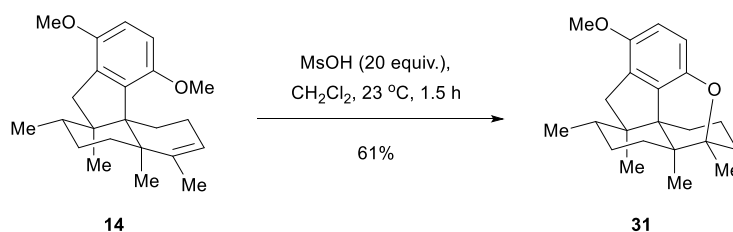

To a stirred solution of dimethyl predysiherbol **14** (10.7 mg, 31.4 μmol, 1.0 equiv.) in CH<sub>2</sub>Cl<sub>2</sub> (1 mL) was added MsOH (60.4 mg, 40.8 μL, 628 μmol, 20 equiv.) at 0 °C. The resulting mixture was warmed to 23 °C and allowed to stir at this temperature for 1.5 h. The reaction mixture was quenched with saturated aqueous NaHCO<sub>3</sub> (10 mL) and extracted with CH<sub>2</sub>Cl<sub>2</sub> (3 × 5 mL). The combined organic layers were washed with brine (5 mL), dried over anhydrous Na<sub>2</sub>SO<sub>4</sub>, filtered, and concentrated under reduced pressure. The crude product was purified by flash column chromatography (silica gel, petroleum ether:EtOAc = 100:1) to give dysiherbol A methyl ether **31** (6.3 mg, 19.2 μmol, 61%).

The analytical data of pentacyclic ether **31** was described above.

#### Preparation of dysiherbol A methyl ether **31** from olefin **35** with MsOH:

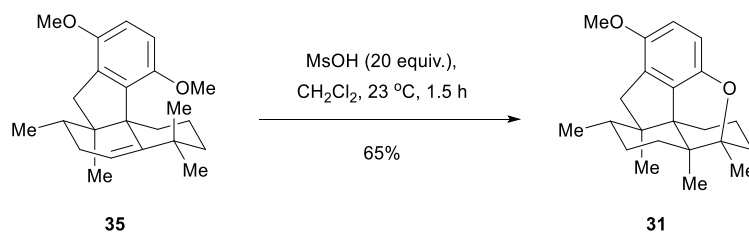

To a stirred solution of olefin **35** (10.2 mg, 30.0  $\mu$ mol, 1.0 equiv.) in CH<sub>2</sub>Cl<sub>2</sub> (1 mL) was added MsOH (57.6 mg, 38.9  $\mu$ L, 600  $\mu$ mol, 20 equiv.) at 0 °C. The resulting mixture was warmed to 23 °C and allowed to stir at this temperature for 1.5 h. The reaction mixture was quenched with saturated aqueous NaHCO<sub>3</sub> (10 mL) and extracted with CH<sub>2</sub>Cl<sub>2</sub> (3  $\times$  5 mL). The combined organic layers were washed with brine (5 mL), dried over anhydrous Na<sub>2</sub>SO<sub>4</sub>, filtered, and concentrated under reduced pressure. The crude product was purified by flash column chromatography (silica gel, petroleum ether:EtOAc = 100:1) to give dysiherbol A methyl ether **31** (6.4 mg, 19.5  $\mu$ mol, 65%).

The analytical data of dysiherbol A methyl ether **31** was described above.

#### Preparation of homoallylic alcohol **44** from dimethyl predysiherbol **14** with *m*-CPBA:

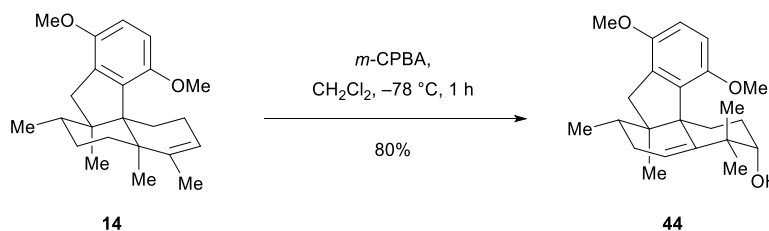

To a stirred solution of dimethyl predysiherbol **14** (32.3 mg, 94.9  $\mu$ mol, 1.0 equiv.) in CH<sub>2</sub>Cl<sub>2</sub> (3 mL) was added *m*-CPBA (23.1 mg, 114  $\mu$ mol, *ca.* 85%, 1.2 equiv.) at -78 °C. The resulting mixture was stirred at this temperature for 1 h. The reaction mixture was quenched with saturated aqueous Na<sub>2</sub>S<sub>2</sub>O<sub>3</sub> (5 mL) saturated and aqueous NaHCO<sub>3</sub> (5 mL) and extracted with CH<sub>2</sub>Cl<sub>2</sub> (3  $\times$  5 mL). The combined organic layers were washed with brine (5 mL), dried over anhydrous Na<sub>2</sub>SO<sub>4</sub>, filtered, and concentrated under reduced pressure. The crude product was purified by flash column chromatography (silica gel, petroleum ether:EtOAc = 10:1  $\rightarrow$  8:1) to give homoallylic alcohol **44** (27.1 mg, 75.9  $\mu$ mol, 80%).

### Characterization of homoallylic alcohol **44**:

**Physical state:** white foam;

**TLC:**  $R_f = 0.46$  (silica gel, petroleum ether:EtOAc = 2:1);

**Optical rotation:**  $[\alpha]_D^{23} = -420$  ( $c = 1.0$ ,  $\text{CHCl}_3$ );

**FT-IR (KBr):**  $\nu_{\text{max}} = 2962, 2930, 2826, 1494, 1462, 1436, 1379, 1255, 1090, 1062, 1024, 995, 965, 789 \text{ cm}^{-1}$ ;

**$^1\text{H}$  NMR (400 MHz,  $\text{C}_6\text{D}_6$ ):**  $\delta = 6.46$  (d,  $J = 8.9$  Hz, 1H), 6.43 (d,  $J = 8.9$  Hz, 1H), 5.77 (t,  $J = 3.7$  Hz, 1H), 4.61 (t,  $J = 7.4$  Hz, 1H), 3.43 (s, 3H), 3.28 (s, 3H), 3.10 (d,  $J = 16.1$  Hz, 1H), 2.73 (d,  $J = 16.1$  Hz, 1H), 2.06–1.83 (m, 3H), 1.74 (dt,  $J = 11.2, 6.3$  Hz, 1H), 1.64–1.45 (m, 2H), 1.51 (s, 3H), 1.45–1.33 (m, 1H), 1.24 (s, 3H), 0.95–0.89 (m, 1H), 0.80 (s, 3H), 0.70 (d,  $J = 6.7$  Hz, 3H) ppm;

**$^{13}\text{C}$  NMR (101 MHz,  $\text{C}_6\text{D}_6$ ):**  $\delta = 152.0, 151.6, 145.5, 142.7, 131.4, 121.6, 110.6, 109.3, 70.3, 55.4, 55.2, 50.7, 41.1, 37.1, 33.1, 30.4, 28.7, 27.8, 27.7, 27.6, 16.8, 12.4$  ppm;

**HRMS (ESI-TOF):** calcd for  $\text{C}_{23}\text{H}_{33}\text{O}_3^+$   $[\text{M}+\text{H}]^+$  357.2424, found 357.2423.

### Preparation of allylic alcohol **45** from dimethyl predysiherbol **14** with *m*-CPBA:

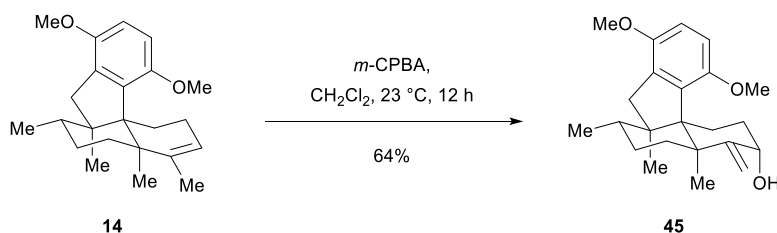

To a stirred solution of dimethyl predysiherbol **14** (32.3 mg, 94.9  $\mu\text{mol}$ , 1.0 equiv.) in  $\text{CH}_2\text{Cl}_2$  (10 mL) was added *m*-CPBA (23.1 mg, 114  $\mu\text{mol}$ , *ca.* 85%, 1.2 equiv.) at  $-78 \text{ }^\circ\text{C}$ . The resulting mixture was allowed to warm to  $23 \text{ }^\circ\text{C}$  gradually and stirred at this temperature for 12 h. The reaction mixture was quenched with saturated aqueous  $\text{Na}_2\text{S}_2\text{O}_3$  (10 mL) saturated and aqueous  $\text{NaHCO}_3$  (10 mL) and extracted with  $\text{CH}_2\text{Cl}_2$  ( $3 \times 10 \text{ mL}$ ). The combined organic layers were washed with brine (10 mL), dried over anhydrous  $\text{Na}_2\text{SO}_4$ , filtered, and concentrated under reduced pressure. The crude product was purified by flash column chromatography (silica gel, petroleum ether:EtOAc = 15:1  $\rightarrow$  10:1) to give allylic alcohol **45** (21.6 mg, 60.7  $\mu\text{mol}$ , 64%).

### Characterization of allylic alcohol **45**:

**Physical state:** white solid;

**M.P.:** 131–133  $^\circ\text{C}$ ;



**TLC:**  $R_f = 0.42$  (silica gel, petroleum ether:EtOAc = 3:1);

**Optical rotation:**  $[\alpha]_D^{23} = +54.5$  ( $c = 1.0$ ,  $\text{CHCl}_3$ );

**FT-IR (KBr):**  $\nu_{\text{max}} = 3649, 3523, 3078, 3026, 2932, 2875, 1491, 1455, 1254, 1093, 999, 882, 780, 717 \text{ cm}^{-1}$ ;

**$^1\text{H}$  NMR (400 MHz,  $\text{C}_6\text{D}_6$ ):**  $\delta = 6.47$  (d,  $J = 8.8$  Hz, 1H), 6.44 (d,  $J = 8.8$  Hz, 1H), 4.72 (d,  $J = 1.3$  Hz, 1H), 4.67 (d,  $J = 1.3$  Hz, 1H), 4.33 (dd,  $J = 4.2, 1.8$  Hz, 1H), 3.42 (s, 3H), 3.17 (s, 3H), 2.94 (d,  $J = 16.0$  Hz, 1H), 2.62 (d,  $J = 16.0$  Hz, 1H), 2.41 (td,  $J = 13.4, 3.9$  Hz, 1H), 1.85–1.56 (m, 4H), 1.55 (s, 3H), 1.55–1.40 (m, 2H), 1.37–1.24 (m, 1H), 1.19 (dt,  $J = 13.0, 3.6$  Hz, 1H), 1.06 (s, 3H), 1.04 (s, 1H), 0.76 (d,  $J = 6.3$  Hz, 3H) ppm;

**$^{13}\text{C}$  NMR (101 MHz,  $\text{C}_6\text{D}_6$ ):**  $\delta = 163.7, 152.0, 151.5, 140.0, 132.5, 110.0, 109.1, 104.8, 73.3, 61.6, 55.1, 52.3, 50.3, 41.8, 40.9, 35.1, 32.4, 29.6, 28.4, 28.2, 24.5, 18.0, 17.7$  ppm;

**HRMS (ESI-TOF):** calcd for  $\text{C}_{23}\text{H}_{33}\text{O}_3^+$   $[\text{M}+\text{H}]^+$  357.2424, found 357.2424.

#### Preparation of tetracyclic diene **46** from homoallylic alcohol **44**:

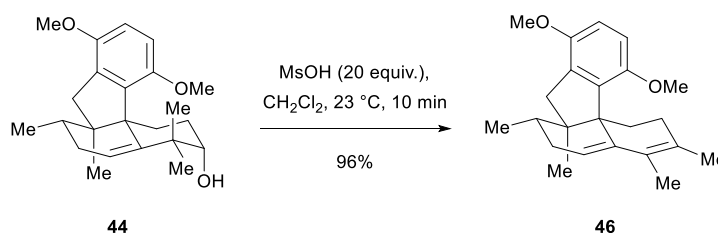

To a stirred solution of homoallylic alcohol **44** (8.4 mg, 23.6  $\mu\text{mol}$ , 1.0 equiv.) in  $\text{CH}_2\text{Cl}_2$  (1 mL) was added MsOH (45.3 mg, 30.6  $\mu\text{L}$ , 471  $\mu\text{mol}$ , 20 equiv.) at 23 °C. The resulting mixture was allowed to stir at this temperature for 10 min. The reaction mixture was quenched with saturated aqueous  $\text{NaHCO}_3$  (10 mL) and extracted with EtOAc ( $3 \times 5$  mL). The combined organic layers were washed with brine (5 mL), dried over anhydrous  $\text{Na}_2\text{SO}_4$ , filtered, and concentrated under reduced pressure. The crude product was purified by flash column chromatography (silica gel, petroleum ether:EtOAc = 100:1) to give tetracyclic diene **46** (7.7 mg, 22.6  $\mu\text{mol}$ , 96%).

#### Characterization of tetracyclic diene **46**:

**Physical state:** white foam;

**M.P.:** 123–125 °C;

**TLC:**  $R_f = 0.55$  (silica gel, petroleum ether:EtOAc = 10:1);

**Optical rotation:**  $[\alpha]_D^{23} = -7.9$  ( $c = 1.0$ ,  $\text{CHCl}_3$ );

**FT-IR (KBr):**  $\nu_{\max}$  = 2964, 2934, 2904, 2883, 2826, 1489, 1463, 1431, 1256, 1090, 1049, 796  $\text{cm}^{-1}$ ;  
 **$^1\text{H}$  NMR (400 MHz,  $\text{C}_6\text{D}_6$ ):**  $\delta$  = 6.50 (d,  $J$  = 8.8 Hz, 1H), 6.46 (d,  $J$  = 8.8 Hz, 1H), 5.83–5.77 (m, 1H), 3.44 (s, 3H), 3.26 (s, 3H), 3.24 (d,  $J$  = 17.2 Hz, 1H), 2.75 (d,  $J$  = 16.1 Hz, 1H), 2.08 (t,  $J$  = 15.3 Hz, 1H), 2.02–1.92 (m, 1H), 1.97 (s, 3H), 1.90–1.83 (m, 1H), 1.85–1.80 (m, 2H), 1.82 (s, 3H), 1.75 (td,  $J$  = 12.2, 4.5 Hz, 1H), 1.63 (ddd,  $J$  = 12.0, 4.5, 2.4 Hz, 1H), 0.90 (s, 3H), 0.79 (d,  $J$  = 6.2 Hz, 3H) ppm;  
 **$^{13}\text{C}$  NMR (101 MHz,  $\text{C}_6\text{D}_6$ ):**  $\delta$  = 153.2, 151.7, 141.4, 137.4, 131.2, 129.5, 127.4, 120.0, 110.9, 109.0, 56.2, 55.4, 55.2, 49.3, 37.0, 32.9, 31.4, 31.1, 30.7, 21.0, 16.6, 15.1, 12.9 ppm;  
**HRMS (ESI-TOF):** calcd for  $\text{C}_{23}\text{H}_{31}\text{O}_2^+$   $[\text{M}+\text{H}]^+$  339.2319, found 339.2320.

### Preparation of tetracyclic diene **46** from allylic alcohol **45**:

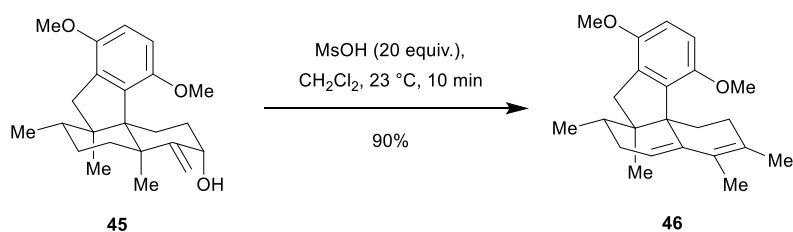

To a stirred solution of homoallylic alcohol **45** (7.8 mg, 21.9  $\mu\text{mol}$ , 1.0 equiv.) in  $\text{CH}_2\text{Cl}_2$  (1 mL) was added MsOH (42.0 mg, 28.4  $\mu\text{L}$ , 438  $\mu\text{mol}$ , 20 equiv.) at 23  $^\circ\text{C}$ . The resulting mixture was allowed to stir at this temperature for 10 min. The reaction mixture was quenched with saturated aqueous  $\text{NaHCO}_3$  (5 mL) and extracted with EtOAc ( $3 \times 5$  mL). The combined organic layers were washed with brine (5 mL), dried over anhydrous  $\text{Na}_2\text{SO}_4$ , filtered, and concentrated under reduced pressure. The crude product was purified by flash column chromatography (silica gel, petroleum ether:EtOAc = 100:1) to give tetracyclic diene **46** (6.7 mg, 19.7  $\mu\text{mol}$ , 90%).

The analytical data of tetracyclic diene **46** was described above.

### Preparation of homoallylic alcohol **44** from allylic alcohol **45** with MsOH:

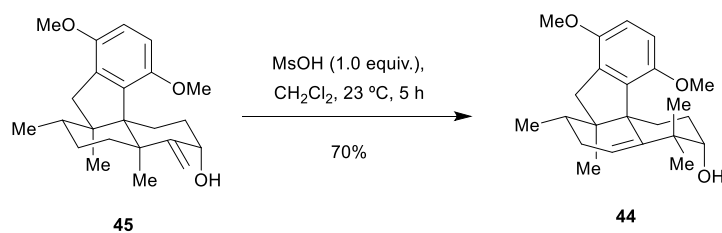

To a stirred solution of allylic alcohol **45** (6.2 mg, 17.4  $\mu\text{mol}$ , 1.0 equiv.) in  $\text{CH}_2\text{Cl}_2$  (0.5 mL) was

added MsOH (1.7 mg, 1.0  $\mu$ L, 17.4  $\mu$ mol, 1.0 equiv.) at 0 °C. The resulting mixture was warmed to 23 °C and allowed to stir at this temperature for 5 h. The reaction mixture was quenched with saturated aqueous NaHCO<sub>3</sub> (10 mL) and extracted with EtOAc (3  $\times$  5 mL). The combined organic layers were washed with brine (5 mL), dried over anhydrous Na<sub>2</sub>SO<sub>4</sub>, filtered, and concentrated under reduced pressure. The crude product was purified by flash column chromatography (silica gel, petroleum ether:EtOAc = 100:1) to give homoallylic alcohol **44** (4.3 mg, 12.2  $\mu$ mol, 70%).

The analytical data of homoallylic alcohol **44** was described above.

### Preparation of homoallylic alcohol **44** from dimethyl predysiherbol **14** with MMPP:

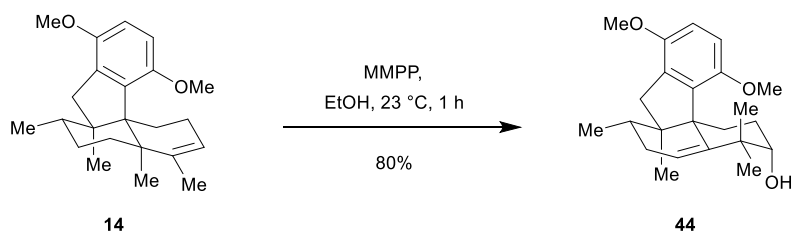

To a stirred solution of dimethyl predysiherbol **14** (34.7 mg, 102  $\mu$ mol, 1.0 equiv.) in EtOH (3 mL) was added MMPP (47.8 mg, 122  $\mu$ mol, *ca.* 80%, 1.2 equiv.) at 0 °C. The resulting mixture was warmed to 23 °C and allowed to stir at this temperature for 1 h. The reaction mixture was quenched with saturated aqueous Na<sub>2</sub>S<sub>2</sub>O<sub>3</sub> (5 mL) saturated and aqueous NaHCO<sub>3</sub> (5 mL) and extracted with EtOAc (3  $\times$  5 mL). The combined organic layers were washed with brine (5 mL), dried over anhydrous Na<sub>2</sub>SO<sub>4</sub>, filtered, and concentrated under reduced pressure. The crude product was purified by flash column chromatography (silica gel, petroleum ether:EtOAc = 10:1 $\rightarrow$ 8:1) to give homoallylic alcohol **44** (29.1 mg, 81.6  $\mu$ mol, 80%).

The analytical data of homoallylic alcohol **44** was described above.

### Preparation of homoallylic alcohol **44** from dimethyl predysiherbol **14** with trifluoroacetone-Oxone<sup>®</sup>-Na<sub>2</sub>EDTA:

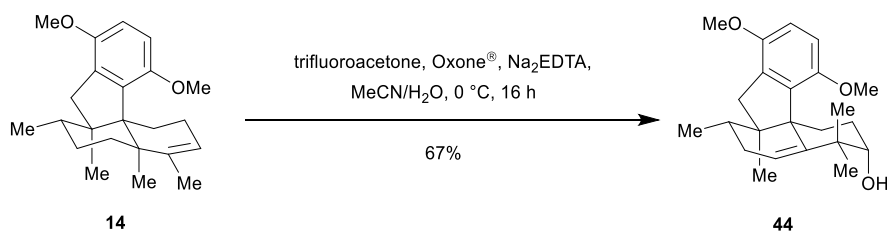

To a stirred solution of dimethyl predysiherbol **14** (10.0 mg, 29.4  $\mu\text{mol}$ , 1.0 equiv.) in MeCN (0.3 mL) was added a mixture of Na<sub>2</sub>EDTA (0.22 mg, 0.59  $\mu\text{mol}$ , 0.02 equiv.) in H<sub>2</sub>O (6.0  $\mu\text{L}$ ) and 1,1,1-trifluoroacetone (33.9 mg, 26.9  $\mu\text{L}$ , 0.294 mmol, 10 equiv.) at 0 °C. Then, a solid mixture of Oxone<sup>®</sup> (41.0 mg, 0.13 mmol, 4.5 equiv.) and NaHCO<sub>3</sub> (17.0 mg, 0.20 mmol, 6.9 equiv.) was added at 0 °C over a period of 20 min. The reaction mixture was stirred for 16 h at 0 °C, before the solid was filtered off and the filtrate was diluted with H<sub>2</sub>O (2 mL) and the aqueous phase was extracted with CH<sub>2</sub>Cl<sub>2</sub> (3  $\times$  3 mL). The combined organic phases were dried over MgSO<sub>4</sub> and the solvent was removed under reduced pressure. The crude product was purified by silica gel column chromatography (*c*-Hex:EtOAc = 9:1) to provide homoallylic alcohol **44** (7.0 mg, 19.7  $\mu\text{mol}$ , 67%).

The analytical data of homoallylic alcohol **44** was described above.

#### Preparation of allylic alcohol **45** from dimethyl predysiherbol **14** through O<sub>2</sub> ene reaction:

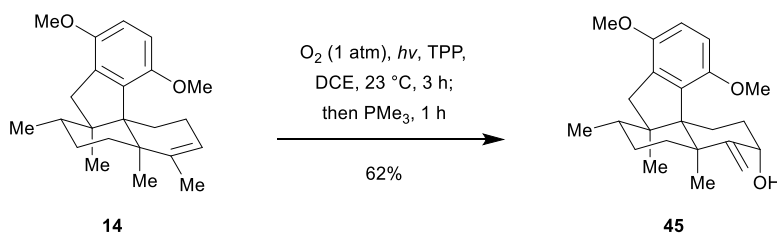

To a stirred solution of dimethyl predysiherbol **14** (49.6 mg, 146  $\mu\text{mol}$ , 1.0 equiv.) in DCE (3 mL) was added TPP (9.0 mg, 14.6  $\mu\text{mol}$ , 0.1 equiv.) at 23 °C under O<sub>2</sub>. The resulting mixture was stirred at this temperature for 3 h, using a fluorescent lamp (Essential 23 W, PHILIPS<sup>®</sup>, distance ~5 cm) as the light. PMe<sub>3</sub> (291  $\mu\text{L}$ , 291  $\mu\text{mol}$ , 1.0 M in THF, 2.0 equiv.) was added to quench the reaction and stirred for 1 h. The solvent was removed in vacuo and the crude product was purified by flash column chromatography (silica gel, petroleum ether:EtOAc = 15:1  $\rightarrow$  10:1) to give allylic alcohol **45** (32.1 mg, 90.5  $\mu\text{mol}$ , 62%).

The analytical data of allylic alcohol **45** was described above.

#### Preparation of ketone **49**:

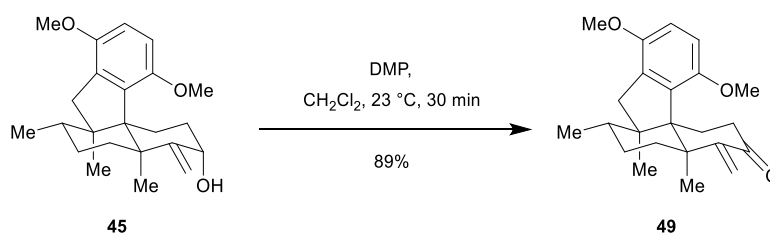

To a stirred solution of allylic alcohol **45** (22.1 mg, 62.0  $\mu\text{mol}$ , 1.0 equiv.) in  $\text{CH}_2\text{Cl}_2$  (2 mL) was added Dess–Martin periodinane (52.6 mg, 124  $\mu\text{mol}$ , 2.0 equiv.) at 0 °C. The resulting mixture was warmed to 23 °C and allowed to stir at this temperature for 30 min. The reaction mixture was quenched with saturated aqueous  $\text{Na}_2\text{S}_2\text{O}_3$  (5 mL) and  $\text{NaHCO}_3$  (5 mL) and extracted with  $\text{CH}_2\text{Cl}_2$  ( $3 \times 5$  mL). The combined organic layers were washed with brine (5 mL), dried over anhydrous  $\text{Na}_2\text{SO}_4$ , filtered, and concentrated under reduced pressure. The crude product was purified by flash column chromatography (silica gel, petroleum ether:EtOAc = 15:1 $\rightarrow$ 10:1) to give ketone **49** (19.6 mg, 55.2  $\mu\text{mol}$ , 89%).

### Characterization of ketone **49**:

**Physical state:** colorless oil;

**TLC:**  $R_f = 0.47$  (silica gel, petroleum ether:EtOAc = 3:1);

**Optical rotation:**  $[\alpha]_D^{23} = +68.9$  ( $c = 1.0$ ,  $\text{CHCl}_3$ );

**FT-IR (KBr):**  $\nu_{\text{max}} = 2947, 2906, 2832, 1688, 1603, 1492, 1460, 1385, 1260, 1092, 1066, 1029, 983, 919, 802, 721 \text{ cm}^{-1}$ ;

**$^1\text{H}$  NMR (400 MHz,  $\text{C}_6\text{D}_6$ ):**  $\delta = 6.43$  (d,  $J = 8.8$  Hz, 1H), 6.38 (d,  $J = 8.8$  Hz, 1H), 6.26 (d,  $J = 1.6$  Hz, 1H), 4.89 (d,  $J = 1.6$  Hz, 1H), 3.41 (s, 3H), 3.11 (s, 3H), 2.96 (d,  $J = 16.1$  Hz, 1H), 2.54 (d,  $J = 16.1$  Hz, 1H), 2.38 (ddd,  $J = 18.2, 5.4, 1.8$  Hz, 1H), 2.21 (ddd,  $J = 18.1, 13.7, 6.8$  Hz, 1H), 1.92 (td,  $J = 13.5, 5.4$  Hz, 1H), 1.63 (dd,  $J = 7.8, 3.2$  Hz, 2H), 1.56–1.42 (m, 1H), 1.41–1.17 (m, 3H), 1.09 (s, 3H), 0.89 (s, 3H), 0.72 (d,  $J = 6.7$  Hz, 3H) ppm;

**$^{13}\text{C}$  NMR (101 MHz,  $\text{C}_6\text{D}_6$ ):**  $\delta = 197.7, 158.2, 151.5, 151.5, 138.2, 132.3, 110.0, 109.7, 109.4, 59.2, 55.1, 52.3, 50.4, 42.2, 40.5, 36.7, 35.0, 33.1, 28.5, 28.4, 27.3, 17.9, 17.5$  ppm;

**HRMS (ESI-TOF):** calcd for  $\text{C}_{23}\text{H}_{31}\text{O}_3^+$   $[\text{M}+\text{H}]^+$  355.2268, found 355.2263.

### Preparation of allylic alcohol **50**:

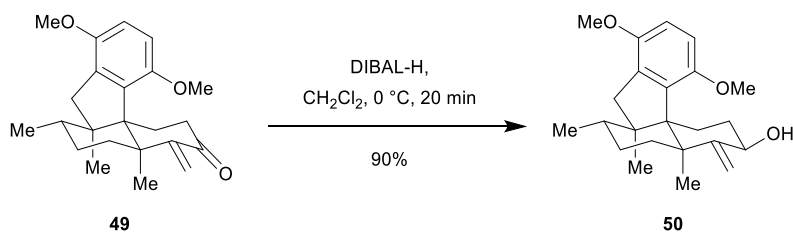

To a stirred solution of ketone **49** (10.3 mg, 29.1  $\mu\text{mol}$ , 1.0 equiv.) in  $\text{CH}_2\text{Cl}_2$  (2 mL) was added DIBAL-H (58.1  $\mu\text{L}$ , 58.1  $\mu\text{mol}$ , 1.0 M in toluene, 2.0 equiv.) at  $-20$  °C. The resulting mixture was

allowed to warm to 0 °C and stirred at this temperature for 20 min. The reaction mixture was quenched with saturated aqueous potassium sodium tartrate (10 mL) and extracted with CH<sub>2</sub>Cl<sub>2</sub> (3 × 5 mL). The combined organic layers were washed with brine (5 mL) and dried over anhydrous Na<sub>2</sub>SO<sub>4</sub>. After filtration and evaporation of the solvent, the residue was purified by flash column chromatography (silica gel, petroleum ether:EtOAc = 12:1) to give allylic alcohol **50** (9.0 mg, 25.3 μmol, 90%).

### Characterization of allylic alcohol **50**:

**Physical state:** white foam;

**TLC:** *R<sub>f</sub>* = 0.39 (silica gel, petroleum ether:EtOAc = 3:1);

**Optical rotation:** [ $\alpha$ ]<sub>D</sub><sup>23</sup> = +18.8 (*c* = 1.0, CHCl<sub>3</sub>);

**FT-IR (KBr):**  $\nu_{\text{max}}$  = 3475, 3027, 2934, 2867, 2831, 1738, 1492, 1458, 1384, 1255, 1148, 1049, 878, 791, 720 cm<sup>-1</sup>;

**<sup>1</sup>H NMR (400 MHz, C<sub>6</sub>D<sub>6</sub>):**  $\delta$  = 6.47 (d, *J* = 8.9 Hz, 1H), 6.45 (d, *J* = 8.9 Hz, 1H), 5.31 (t, *J* = 1.7 Hz, 1H), 4.82–4.77 (m, 1H), 4.47 (s, 1H), 3.41 (s, 3H), 3.18 (s, 3H), 2.95 (d, *J* = 16.0 Hz, 1H), 2.55 (d, *J* = 16.0 Hz, 1H), 1.83 (ddd, *J* = 10.0, 5.3, 2.7 Hz, 1H), 1.76 (ddd, *J* = 12.7, 5.7, 3.2 Hz, 2H), 1.61 (td, *J* = 12.8, 4.2 Hz, 1H), 1.56–1.33 (m, 3H), 1.32–1.27 (m, 1H), 1.27–1.24 (m, 2H), 1.18 (s, 3H), 0.94 (s, 3H), 0.74 (d, *J* = 6.5 Hz, 3H) ppm;

**<sup>13</sup>C NMR (101 MHz, C<sub>6</sub>D<sub>6</sub>):**  $\delta$  = 163.0, 151.9, 151.6, 140.0, 132.3, 111.2, 109.2, 97.7, 69.5, 61.7, 55.1, 53.0, 50.3, 42.7, 40.6, 34.9, 33.3, 32.8, 28.6, 28.3, 27.0, 18.0, 17.6 ppm;

**HRMS (ESI-TOF):** calcd for C<sub>23</sub>H<sub>33</sub>O<sub>3</sub><sup>+</sup> [M+H]<sup>+</sup> 357.2424, found 357.2421.

### Preparation of dysiherbol B methyl ether **16** from allylic alcohol **50**:

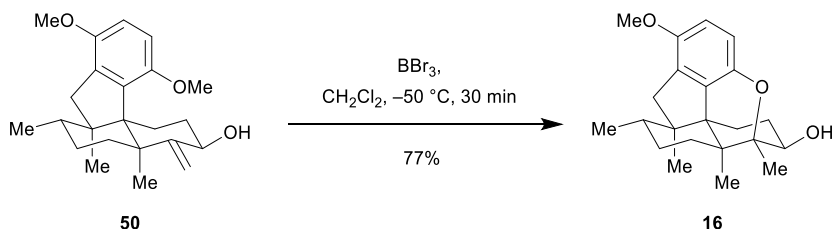

To a stirred solution of allylic alcohol **50** (11.3 mg, 31.7 μmol, 1.0 equiv.) in CH<sub>2</sub>Cl<sub>2</sub> (1 mL) was added BBr<sub>3</sub> (38.0 μL, 38.0 μmol, 1.0 M in CH<sub>2</sub>Cl<sub>2</sub>, 1.2 equiv.) at -50 °C. The resulting mixture was stirred at this temperature for 30 min. The reaction mixture was quenched with saturated aqueous NaHCO<sub>3</sub> (10 mL) and extracted with CH<sub>2</sub>Cl<sub>2</sub> (3 × 5 mL). The combined organic layers were washed with brine (5 mL), dried over anhydrous Na<sub>2</sub>SO<sub>4</sub>, filtered, and concentrated under reduced pressure.

The crude product was purified by flash column chromatography (silica gel, petroleum ether:EtOAc = 15:1→10:1) to give dysiherbol B methyl ether **16** (8.4 mg, 24.4  $\mu\text{mol}$ , 77%).

### Characterization of dysiherbol B methyl ether **16**:

**Physical state:** pale yellow oil;

**TLC:**  $R_f$  = 0.41 (silica gel, petroleum ether:EtOAc = 3:1);

**Optical rotation:**  $[\alpha]_D^{23} = +13.5$  ( $c = 1.0$ ,  $\text{CHCl}_3$ );

**FT-IR (KBr):**  $\nu_{\text{max}} = 3432, 2961, 2926, 2855, 1492, 1457, 1401, 1381, 1261, 1102, 1074, 1028, 799$   $\text{cm}^{-1}$ ;

**$^1\text{H}$  NMR (400 MHz,  $\text{C}_6\text{D}_6$ ):**  $\delta = 6.69$  (d,  $J = 8.6$  Hz, 1H), 6.41 (d,  $J = 8.6$  Hz, 1H), 3.73 (td,  $J = 11.2, 6.7$  Hz, 1H), 3.42 (s, 3H), 2.80 (d,  $J = 15.4$  Hz, 1H), 2.57 (dd,  $J = 15.4, 1.0$  Hz, 1H), 1.91 (d,  $J = 11.3$  Hz, 1H), 1.82 (dtd,  $J = 10.5, 6.1, 1.5$  Hz, 1H), 1.55–1.42 (m, 1H), 1.39 (s, 3H), 1.33 (dt,  $J = 12.9, 3.6$  Hz, 1H), 1.27–1.11 (m, 4H), 1.14–1.02 (m, 1H), 0.97 (dq,  $J = 13.5, 3.6$  Hz, 1H), 0.81 (s, 3H), 0.79–0.77 (s, 3H), 0.67 (d,  $J = 6.7$  Hz, 3H) ppm;

**$^{13}\text{C}$  NMR (101 MHz,  $\text{C}_6\text{D}_6$ ):**  $\delta = 151.3, 148.1, 133.7, 128.5, 111.3, 110.6, 84.6, 72.1, 55.4, 51.6, 48.6, 40.5, 37.6, 35.7, 30.7, 30.7, 27.1, 26.5, 17.8, 17.4, 15.0$  ppm;

**HRMS (ESI-TOF):** calcd for  $\text{C}_{22}\text{H}_{31}\text{O}_3^+$   $[\text{M}+\text{H}]^+$  343.2268, found 343.2269.

### Preparation of dysiherbol B (**7**) from dysiherbol B methyl ether **16**:

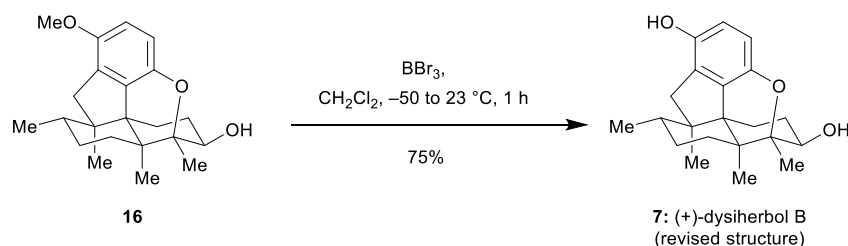

To a stirred solution of dysiherbol B methyl ether **16** (9.3 mg, 27.2  $\mu\text{mol}$ , 1.0 equiv.) in  $\text{CH}_2\text{Cl}_2$  (1 mL) was added  $\text{BBr}_3$  (136  $\mu\text{L}$ , 136  $\mu\text{mol}$ , 1.0 M in  $\text{CH}_2\text{Cl}_2$ , 5.0 equiv.) at  $-50$   $^\circ\text{C}$ . The resulting mixture was allowed to warm to  $23$   $^\circ\text{C}$  and stirred at this temperature for 1 h. The reaction mixture was quenched with saturated aqueous  $\text{NaHCO}_3$  (5 mL) and extracted with  $\text{CH}_2\text{Cl}_2$  ( $3 \times 5$  mL). The combined organic layers were washed with brine (5 mL), dried over anhydrous  $\text{Na}_2\text{SO}_4$ , filtered and concentrated under reduced pressure. The crude product was purified by flash column chromatography (silica gel, petroleum ether:EtOAc = 6:1→3:1) to give dysiherbol B (**7**) (6.7 mg, 20.4  $\mu\text{mol}$ , 75%).

### Characterization of dysiherbol B (7):

**Physical state:** white solid;

**M.P.:** 235–237 °C;

**TLC:**  $R_f = 0.49$  (silica gel, petroleum ether:EtOAc = 1:1);

**Optical rotation:**  $[\alpha]_D^{23} = +20.0$  ( $c = 1.0$ , MeOH);

**FT-IR (KBr):**  $\nu_{\max} = 3565, 3422, 2926, 2855, 1715, 1700, 1650, 1490, 1339, 1258, 1105, 1061, 1033$   $\text{cm}^{-1}$ ;

**$^1\text{H NMR}$  (400 MHz, pyridine-*d*<sub>5</sub>):**  $\delta = 10.61$  (s, 1H), 6.92 (d,  $J = 8.4$  Hz, 1H), 6.64 (d,  $J = 8.4$  Hz, 1H), 4.17 (dd,  $J = 11.8, 6.3$  Hz, 1H), 2.96 (d,  $J = 15.2$  Hz, 1H), 2.76 (d,  $J = 15.2$  Hz, 1H), 2.12–2.04 (m, 1H), 1.86 (td,  $J = 13.1, 4.3$  Hz, 1H), 1.68 (td,  $J = 12.7, 5.2$  Hz, 1H), 1.61 (s, 3H), 1.54–1.46 (m, 1H), 1.45–1.40 (m, 1H), 1.40–1.35 (m, 1H), 1.35–1.32 (m, 1H), 1.31–1.23 (m, 1H), 1.13 (s, 3H), 1.12–1.07 (m, 1H), 0.99 (s, 3H), 0.73 (d,  $J = 6.2$  Hz, 3H) ppm;

**$^1\text{H NMR}$  (400 MHz, CD<sub>3</sub>OD):**  $\delta = 6.45$  (d,  $J = 8.6$  Hz, 1H), 6.41 (d,  $J = 8.6$  Hz, 1H), 3.90 (dd,  $J = 12.0, 6.4$  Hz, 1H), 2.62 (d,  $J = 15.3$  Hz, 1H), 2.53 (d,  $J = 15.3$  Hz, 1H), 1.96 (td,  $J = 13.3, 4.5$  Hz, 1H), 1.86–1.77 (m, 1H), 1.49–1.38 (m, 3H), 1.38–1.31 (m, 1H), 1.29 (s, 3H), 1.26–1.22 (m, 1H), 1.21 (s, 3H), 1.20–1.12 (m, 2H), 1.09 (s, 3H), 0.86 (d,  $J = 6.7$  Hz, 3H) ppm;

**$^{13}\text{C NMR}$  (101 MHz, pyridine-*d*<sub>5</sub>):**  $\delta = 149.4, 148.0, 133.9, 127.4, 115.6, 112.2, 85.1, 72.6, 52.1, 49.4, 41.2, 38.3, 36.2, 31.1, 31.0, 27.8, 27.1, 18.4, 18.3, 18.2, 15.5$  ppm;

**$^{13}\text{C NMR}$  (101 MHz, CD<sub>3</sub>OD):**  $\delta = 148.3, 148.2, 133.8, 127.2, 115.7, 112.4, 84.8, 73.1, 52.6, 49.7, 40.7, 38.7, 36.7, 31.5, 30.3, 27.9, 27.4, 18.3, 18.0, 17.5, 15.3$  ppm;

**HRMS (ESI-TOF):** calcd for C<sub>21</sub>H<sub>29</sub>O<sub>3</sub><sup>+</sup> [M+H]<sup>+</sup> 329.2111, found 329.2112.

### Preparation of dysiherbol B (7) from allylic alcohol 50:

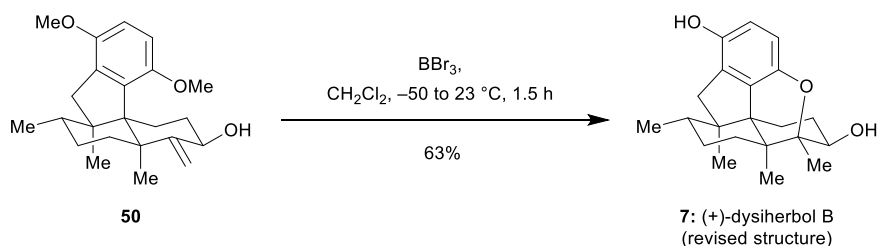

To a stirred solution of allylic alcohol **50** (5.3 mg, 14.9  $\mu\text{mol}$ , 1.0 equiv.) in CH<sub>2</sub>Cl<sub>2</sub> (1 mL) was added BBr<sub>3</sub> (74.3  $\mu\text{L}$ , 74.3  $\mu\text{mol}$ , 1.0 M in CH<sub>2</sub>Cl<sub>2</sub>, 5.0 equiv.) at -50 °C. The resulting mixture was allowed to warm to 23 °C and stirred at this temperature for 1.5 h. The reaction mixture was quenched with



saturated aqueous NaHCO<sub>3</sub> (10 mL) and extracted with CH<sub>2</sub>Cl<sub>2</sub> (3 × 5 mL). The combined organic layers were washed with brine (5 mL), dried over anhydrous Na<sub>2</sub>SO<sub>4</sub>, filtered, and concentrated under reduced pressure. The crude product was purified by flash column chromatography (silica gel, petroleum ether:EtOAc = 6:1→3:1) to give dysiherbol B (**7**) (3.1 mg, 9.4 μmol, 63%).

The analytical data of dysiherbol B (**7**) was described above.

### Preparation of ketone **51**:

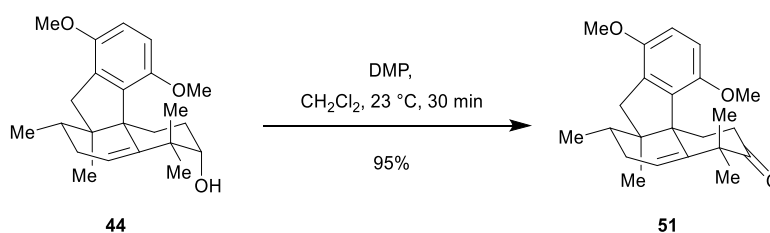

To a stirred solution of homoallylic alcohol **44** (30.1 mg, 84.4 μmol, 1.0 equiv.) in CH<sub>2</sub>Cl<sub>2</sub> (3 mL) was added Dess–Martin periodinane (71.6 mg, 169 μmol, 2.0 equiv.) at 0 °C. The resulting mixture was allowed to warm to 23 °C and stirred at this temperature for 30 min. The reaction mixture was quenched with saturated aqueous Na<sub>2</sub>S<sub>2</sub>O<sub>3</sub> (5 mL) and NaHCO<sub>3</sub> (5 mL) and extracted with CH<sub>2</sub>Cl<sub>2</sub> (3 × 5 mL). The combined organic layers were washed with brine (5 mL), dried over anhydrous Na<sub>2</sub>SO<sub>4</sub>, filtered, and concentrated under reduced pressure. The crude product was purified by flash column chromatography (silica gel, petroleum ether:EtOAc = 12:1→8:1) to give ketone **51** (28.4 mg, 80.2 μmol, 95%).

### Characterization of ketone **51**:

**Physical state:** colorless oil;

**TLC:**  $R_f = 0.52$  (silica gel, petroleum ether:EtOAc = 2:1);

**Optical rotation:**  $[\alpha]_D^{23} = -9.6$  ( $c = 1.0$ , CHCl<sub>3</sub>);

**FT-IR (KBr):**  $\nu_{\max} = 2957, 2924, 2853, 1706, 1491, 1459, 1374, 1252, 1087, 1056, 1025, 787, 714$  cm<sup>-1</sup>;

**<sup>1</sup>H NMR (400 MHz, C<sub>6</sub>D<sub>6</sub>):**  $\delta = 6.41$  (d,  $J = 8.7$  Hz, 1H),  $6.32$  (d,  $J = 8.7$  Hz, 1H),  $5.63$  (t,  $J = 3.5$  Hz, 1H),  $3.43$  (s, 3H),  $3.26$  (s, 3H),  $3.21$  (d,  $J = 16.1$  Hz, 1H),  $2.62$  (d,  $J = 16.1$  Hz, 1H),  $2.27$  (ddd,  $J = 19.3, 6.0, 1.8$  Hz, 1H),  $2.14$  (ddd,  $J = 19.5, 13.7, 6.1$  Hz, 1H),  $1.77$  (tt,  $J = 15.1, 5.9$  Hz, 3H),  $1.71$  (s, 3H),  $1.62$ – $1.49$  (m, 1H),  $1.43$  (ddd,  $J = 13.3, 6.1, 1.8$  Hz, 1H),  $1.23$  (s, 3H),  $0.78$  (s, 3H),  $0.73$  (d,

$J = 6.3$  Hz, 3H) ppm;

$^{13}\text{C}$  NMR (101 MHz,  $\text{C}_6\text{D}_6$ ):  $\delta = 210.4, 151.5, 151.0, 144.3, 140.0, 130.8, 122.8, 109.1, 108.7, 55.3, 55.2, 53.3, 49.9, 49.4, 36.7, 34.3, 33.6, 32.5, 30.5, 27.9, 25.1, 16.6, 12.4$  ppm;

HRMS (ESI-TOF): calcd for  $\text{C}_{23}\text{H}_{30}\text{O}_3\text{Na}^+ [\text{M}+\text{Na}]^+$  377.2087, found 377.2084.

### Preparation of homoallylic alcohol **52**:

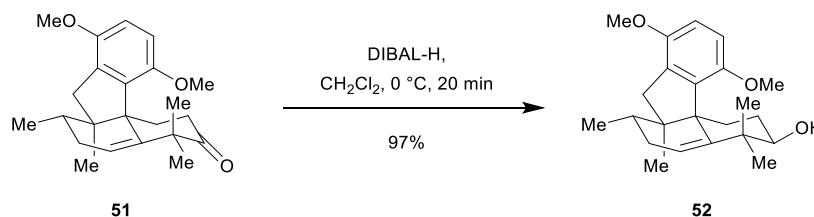

To a stirred solution of ketone **51** (19.8 mg, 55.9  $\mu\text{mol}$ , 1.0 equiv.) in  $\text{CH}_2\text{Cl}_2$  (2 mL) was added DIBAL-H (112  $\mu\text{L}$ , 112  $\mu\text{mol}$ , 1.0 M in toluene, 2.0 equiv.) at  $-20^\circ\text{C}$ . The resulting mixture was allowed to warm to  $0^\circ\text{C}$  and stirred at this temperature for 20 min. The reaction mixture was quenched with saturated aqueous potassium sodium tartrate (10 mL) and extracted with  $\text{CH}_2\text{Cl}_2$  ( $3 \times 5$  mL). The combined organic layers were washed with brine (5 mL) and dried over anhydrous  $\text{Na}_2\text{SO}_4$ . After filtration and evaporation of the solvent, the residue was purified by flash column chromatography (silica gel, petroleum ether:EtOAc = 10:1) to give homoallylic alcohol **52** (19.3 mg, 54.2  $\mu\text{mol}$ , 97%).

### Characterization of homoallylic alcohol **52**:

**Physical state:** white foam;

**TLC:**  $R_f = 0.42$  (silica gel, petroleum ether:EtOAc = 2:1);

**Optical rotation:**  $[\alpha]_{\text{D}}^{23} = -417$  ( $c = 1.0$ ,  $\text{CHCl}_3$ );

**FT-IR (KBr):**  $\nu_{\text{max}} = 3522, 2959, 2935, 2866, 2842, 1494, 1458, 1378, 1254, 1082, 1058, 971, 790, 716$   $\text{cm}^{-1}$ ;

$^1\text{H}$  NMR (400 MHz,  $\text{C}_6\text{D}_6$ ):  $\delta = 6.44$  (d,  $J = 8.8$  Hz, 1H), 6.38 (d,  $J = 8.8$  Hz, 1H), 5.73 (t,  $J = 4.0$  Hz, 1H), 3.85 (d,  $J = 11.5$  Hz, 1H), 3.67 (ddd,  $J = 11.5, 8.5, 5.8$  Hz, 1H), 3.40 (s, 3H), 3.28 (s, 3H), 3.05 (d,  $J = 15.9$  Hz, 1H), 2.71 (d,  $J = 15.9$  Hz, 1H), 2.20 (ddt,  $J = 13.5, 8.8, 4.4$  Hz, 1H), 1.91 (ddd,  $J = 18.2, 6.6, 3.9$  Hz, 1H), 1.83–1.66 (m, 2H), 1.65–1.48 (m, 2H), 1.59 (s, 3H), 1.45 (dt,  $J = 13.2, 4.5$  Hz, 1H), 1.19 (s, 3H), 0.81 (s, 3H), 0.70 (d,  $J = 6.7$  Hz, 3H) ppm;

$^{13}\text{C}$  NMR (101 MHz,  $\text{C}_6\text{D}_6$ ):  $\delta = 152.8, 150.2, 145.1, 144.6, 131.4, 123.3, 113.8, 109.3, 74.3, 57.9, 55.8, 55.2, 50.7, 40.9, 38.3, 37.9, 33.4, 31.8, 30.9, 27.3, 27.3, 17.5, 12.8$  ppm;

**HRMS (ESI-TOF):** calcd for  $C_{23}H_{33}O_3^+$   $[M+H]^+$  357.2424, found 357.2421.

**Preparation of dysiherbol B methyl ether 16 from homoallylic alcohol 52:**

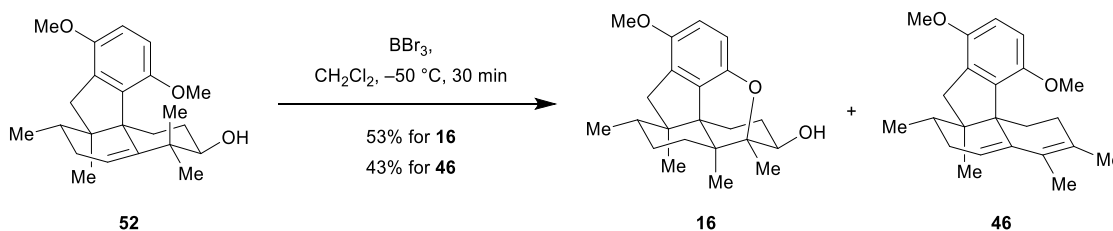

To a stirred solution of homoallylic alcohol **52** (10.9 mg, 30.6  $\mu\text{mol}$ , 1.0 equiv.) in  $CH_2Cl_2$  (1 mL) was added  $BBr_3$  (36.7  $\mu\text{L}$ , 36.7  $\mu\text{mol}$ , 1.0 M in  $CH_2Cl_2$ , 1.2 equiv.) at  $-50\text{ }^\circ\text{C}$ . The resulting mixture was stirred at this temperature for 30 min. The reaction mixture was quenched with saturated aqueous  $NaHCO_3$  (10 mL) and extracted with  $CH_2Cl_2$  ( $3 \times 5\text{ mL}$ ). The combined organic layers were washed with brine (5 mL), dried over anhydrous  $Na_2SO_4$ , filtered, and concentrated under reduced pressure. The crude product was purified by flash column chromatography (silica gel, petroleum ether:EtOAc = 50:1 $\rightarrow$ 10:1) to give dysiherbol B methyl ether **16** (5.5 mg, 16.2  $\mu\text{mol}$ , 53%) and tetracyclic diene **46** (4.5 mg, 13.2  $\mu\text{mol}$ , 43%).

The analytical data of dysiherbol B methyl ether **16** and tetracyclic diene **46** were described above.

**Preparation of dysiherbol B (7) from homoallylic alcohol 52:**

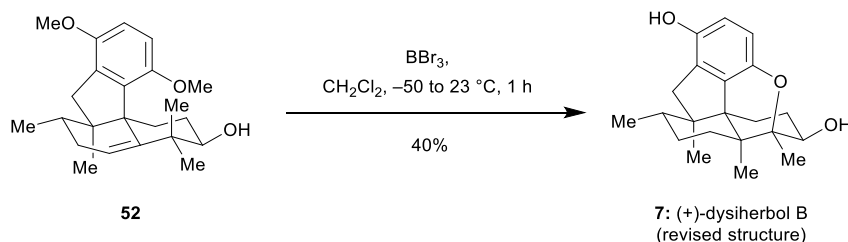

To a stirred solution of homoallylic alcohol **52** (5.8 mg, 16.3  $\mu\text{mol}$ , 1.0 equiv.) in  $CH_2Cl_2$  (1 mL) was added  $BBr_3$  (81.3  $\mu\text{L}$ , 81.3  $\mu\text{mol}$ , 1.0 M in  $CH_2Cl_2$ , 5.0 equiv.) at  $-50\text{ }^\circ\text{C}$ . The resulting mixture was allowed to warm to  $23\text{ }^\circ\text{C}$  and stirred at this temperature for 1 h. The reaction mixture was quenched with saturated aqueous  $NaHCO_3$  (10 mL) and extracted with  $CH_2Cl_2$  ( $3 \times 5\text{ mL}$ ). The combined organic layers were washed with brine (5 mL), dried over anhydrous  $Na_2SO_4$ , filtered, and concentrated under reduced pressure. The crude product was purified by flash column chromatography (silica gel, petroleum ether:EtOAc = 6:1 $\rightarrow$ 3:1) to give dysiherbol B (**7**) (2.1 mg, 6.5  $\mu\text{mol}$ , 40%).

The analytical data of dysiherbol B (7) was described above.

#### Preparation of dysiherbol C methyl ether S4:

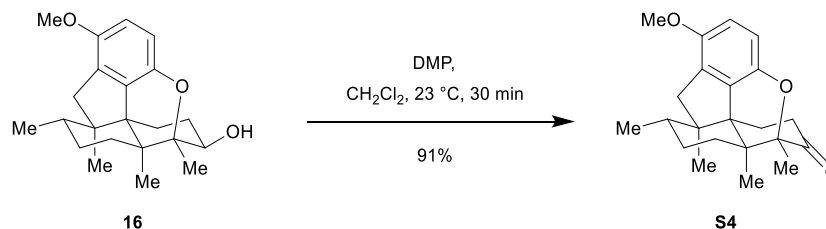

To a stirred solution of dysiherbol B methyl ether **16** (12.5 mg, 36.5  $\mu\text{mol}$ , 1.0 equiv.) in  $\text{CH}_2\text{Cl}_2$  (2 mL) was added Dess–Martin periodinane (31.0 mg, 73.0  $\mu\text{mol}$ , 2.0 equiv.) at 0  $^\circ\text{C}$ . The resulting mixture was allowed to warm to 23  $^\circ\text{C}$  and stirred at this temperature for 30 min. The reaction mixture was quenched with saturated aqueous  $\text{Na}_2\text{S}_2\text{O}_3$  (5 mL) and  $\text{NaHCO}_3$  (5 mL) and extracted with  $\text{CH}_2\text{Cl}_2$  ( $3 \times 5$  mL). The combined organic layers were washed with brine (5 mL), dried over anhydrous  $\text{Na}_2\text{SO}_4$ , filtered, and concentrated under reduced pressure. The crude product was purified by flash column chromatography (silica gel, petroleum ether:EtOAc = 25:1 $\rightarrow$ 15:1) to give dysiherbol C methyl ether **S4** (11.3 mg, 33.2  $\mu\text{mol}$ , 91%).

#### Characterization of dysiherbol C methyl ether S4:

**Physical state:** colorless oil;

**TLC:**  $R_f = 0.48$  (silica gel, petroleum ether:EtOAc = 5:1);

**Optical rotation:**  $[\alpha]_D^{23} = +260$  ( $c = 1.0$ ,  $\text{CHCl}_3$ );

**FT-IR (KBr):**  $\nu_{\text{max}} = 3418, 2953, 1716, 1492, 1456, 1383, 1341, 1312, 1254, 1186, 1106, 1072, 1038, 836, 798\text{ cm}^{-1}$ ;

**$^1\text{H NMR}$  (400 MHz,  $\text{C}_6\text{D}_6$ ):**  $\delta = 6.73$  (d,  $J = 8.7$ , 1H), 6.41 (d,  $J = 8.7$  Hz, 1H), 3.41 (s, 3H), 2.83 (d,  $J = 15.6$  Hz, 1H), 2.54 (dd,  $J = 15.6, 1.1$  Hz, 1H), 2.22 (ddd,  $J = 15.6, 5.3, 1.7$  Hz, 1H), 2.09 (ddd,  $J = 15.6, 12.8, 7.6$  Hz, 1H), 1.59 (td,  $J = 12.9, 5.3$  Hz, 1H), 1.49 (s, 3H), 1.38–1.10 (m, 3H), 1.10–0.87 (m, 3H), 0.74 (s, 3H), 0.68 (d,  $J = 0.8$  Hz, 3H), 0.64 (d,  $J = 6.8$  Hz, 3H) ppm;

**$^{13}\text{C NMR}$  (101 MHz,  $\text{C}_6\text{D}_6$ ):**  $\delta = 204.9, 151.4, 146.4, 132.5, 128.4, 112.4, 111.2, 86.6, 55.3, 52.1, 48.3, 40.5, 38.1, 36.8, 35.8, 30.5, 29.2, 26.6, 18.3, 17.6, 15.2, 15.1$  ppm;

**HRMS (ESI-TOF):** calcd for  $\text{C}_{22}\text{H}_{29}\text{O}_3^+$   $[\text{M}+\text{H}]^+$  341.2111, found 341.2113.

## Preparation of dysiherbol C (8) from dysiherbol C methyl ether S4:

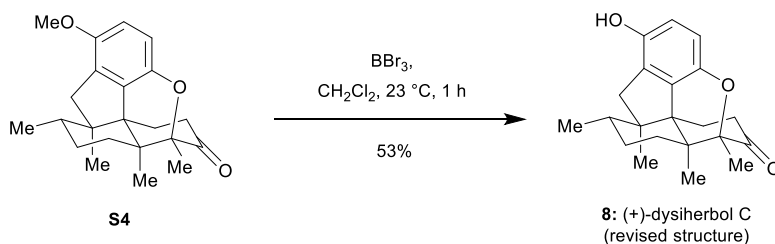

To a stirred solution of dysiherbol C methyl ether **S4** (10.3 mg, 30.3  $\mu\text{mol}$ , 1.0 equiv.) in  $\text{CH}_2\text{Cl}_2$  (1 mL) was added  $\text{BBr}_3$  (151  $\mu\text{L}$ , 151  $\mu\text{mol}$ , 1.0 M in  $\text{CH}_2\text{Cl}_2$ , 5.0 equiv.) at  $-20\text{ }^\circ\text{C}$ . The resulting mixture was allowed to warm to  $23\text{ }^\circ\text{C}$  and stirred at this temperature for 1 h. The reaction mixture was quenched with saturated aqueous  $\text{NaHCO}_3$  (10 mL) and extracted with  $\text{CH}_2\text{Cl}_2$  ( $3 \times 5\text{ mL}$ ). The combined organic layers were washed with brine (5 mL), dried over anhydrous  $\text{Na}_2\text{SO}_4$ , filtered, and concentrated under reduced pressure. The crude product was purified by flash column chromatography (silica gel, petroleum ether:EtOAc = 25:1  $\rightarrow$  15:1) to give dysiherbol C (**8**) (5.2 mg, 16.0  $\mu\text{mol}$ , 53%).

## Characterization of dysiherbol C (8):

**Physical state:** white solid;

**M.P.:** 241–243  $^\circ\text{C}$ ;

**TLC:**  $R_f = 0.53$  (silica gel, petroleum ether:EtOAc = 5:1);

**Optical rotation:**  $[\alpha]_D^{23} = +206$  ( $c = 1.0$ , MeOH);

**FT-IR (KBr):**  $\nu_{\text{max}} = 3384, 2957, 2938, 2857, 1705, 1494, 1460, 1385, 1324, 1280, 1251, 1177, 1100, 1021, 952, 907, 806\text{ cm}^{-1}$ ;

**$^1\text{H}$  NMR (400 MHz,  $\text{CDCl}_3$ , 7.26):**  $\delta = 6.58$  (d,  $J = 8.5\text{ Hz}$ , 1H), 6.53 (d,  $J = 8.5\text{ Hz}$ , 1H), 4.24 (s, 1H), 2.69 (d,  $J = 15.3\text{ Hz}$ , 1H), 2.64 (d,  $J = 15.4\text{ Hz}$ , 1H), 2.38 (dd, 12.0, 4.8 Hz, 1H), 2.20–2.12 (m, 1H), 2.12–2.04 (m, 1H), 1.80–1.69 (m, 1H), 1.40–1.37 (m, 1H), 1.37–1.34 (m, 1H), 1.33 (s, 3H), 1.33–1.31 (m, 1H), 1.31–1.27 (m, 1H), 1.27–1.23 (m, 1H), 1.12 (s, 3H), 1.02 (s, 3H), 0.87 (d,  $J = 6.4\text{ Hz}$ , 3H) ppm;

**$^{13}\text{C}$  NMR (101 MHz,  $\text{CDCl}_3$ , 77.16):**  $\delta = 206.6, 146.6, 145.7, 132.0, 126.1, 115.6, 112.8, 86.3, 52.6, 48.2, 39.6, 38.1, 36.8, 35.7, 30.5, 29.4, 26.5, 18.6, 17.7, 15.5, 14.7\text{ ppm}$ ;

**HRMS (ESI-TOF):** calcd for  $\text{C}_{21}\text{H}_{27}\text{O}_2^+$   $[\text{M}+\text{H}]^+$  327.1955, found 327.1956.

## Preparation of *epi*-dysiherbol B S5:

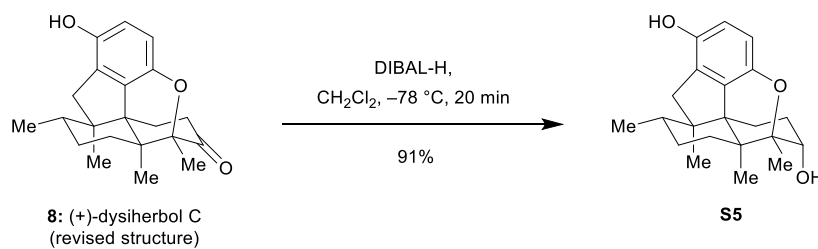

To a stirred solution of dysiherbol C (**8**) (23.8 mg, 72.9  $\mu\text{mol}$ , 1.0 equiv.) in  $\text{CH}_2\text{Cl}_2$  (2 mL) was added DIBAL-H (94.8  $\mu\text{L}$ , 94.8  $\mu\text{mol}$ , 1.0 M in toluene, 1.3 equiv.) at  $-78\text{ }^\circ\text{C}$ . The resulting mixture was allowed to stir at this temperature for 20 min. The reaction mixture was quenched with saturated aqueous potassium sodium tartrate (5 mL) and extracted with  $\text{CH}_2\text{Cl}_2$  ( $3 \times 5\text{ mL}$ ). The combined organic layers were washed with brine (3 mL) and dried over anhydrous  $\text{Na}_2\text{SO}_4$ . After filtration and evaporation of the solvent, the residue was purified by flash column chromatography (silica gel, petroleum ether:EtOAc = 10:1) to give *epi*-dysiherbol B **S5** (21.8 mg, 66.3  $\mu\text{mol}$ , 91%).

### Characterization of *epi*-dysiherbol B **S5**:

**Physical state:** white foam;

**TLC:**  $R_f = 0.49$  (silica gel, petroleum ether:EtOAc = 2:1);

**Optical rotation:**  $[\alpha]_D^{23} = +39.3$  ( $c = 1.0$ ,  $\text{CHCl}_3$ );

**FT-IR (KBr):**  $\nu_{\text{max}} = 3210, 2981, 2958, 2929, 2860, 1488, 1452, 1382, 1262, 1208, 1103, 1057, 1031, 956, 927, 811\text{ cm}^{-1}$ ;

**$^1\text{H NMR}$  (400 MHz,  $\text{C}_6\text{D}_6$ ):**  $\delta = 6.65$  (d,  $J = 8.4\text{ Hz}$ , 1H), 6.35 (d,  $J = 8.4\text{ Hz}$ , 1H), 4.02 (s, 1H), 3.53 (s, 1H), 2.50 (d,  $J = 15.1\text{ Hz}$ , 1H), 2.43 (d,  $J = 15.1\text{ Hz}$ , 1H), 1.86 (td,  $J = 13.2, 4.5\text{ Hz}$ , 1H), 1.54 (m, 1H), 1.35 (s, 3H), 1.33 (s, 3H), 1.31–1.26 (m, 1H), 1.26–1.15 (m, 3H), 1.12–0.95 (m, 3H), 0.90 (s, 3H), 0.67 (d,  $J = 5.6\text{ Hz}$ , 3H) ppm;

**$^{13}\text{C NMR}$  (101 MHz,  $\text{C}_6\text{D}_6$ ):**  $\delta = 147.7, 146.9, 133.4, 126.3, 114.9, 111.8, 83.3, 75.7, 51.8, 49.4, 39.9, 37.0, 35.8, 30.8, 29.6, 26.1, 23.1, 19.1, 17.9, 17.6, 15.0$  ppm;

**HRMS (ESI-TOF):** calcd for  $\text{C}_{21}\text{H}_{29}\text{O}_3^+$   $[\text{M}+\text{H}]^+$  329.2111, found 329.2107.

### Preparation of dysiherbol D (**9**) from *epi*-dysiherbol B **S5**:

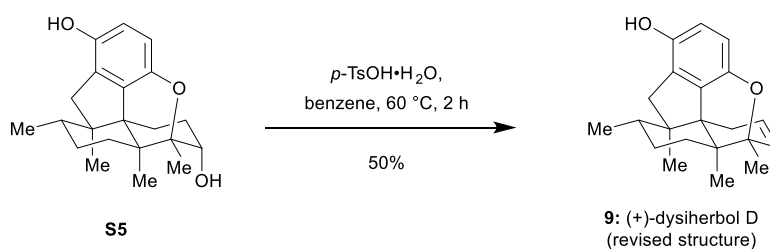

To a stirred solution of *epi*-dysiherbol B **S5** (7.7 mg, 23.4  $\mu\text{mol}$ , 1.0 equiv.) in benzene (2 mL) was added *p*-TsOH $\cdot$ H<sub>2</sub>O (13.5 mg, 70.2  $\mu\text{mol}$ , 3.0 equiv.) at 23 °C. The resulting mixture was allowed to warm to 60 °C and stirred at this temperature for 2 h. The reaction mixture was quenched with saturated aqueous NaHCO<sub>3</sub> (3 mL) and extracted with EtOAc (3  $\times$  5 mL). The combined organic layers were washed with brine (3 mL), dried over anhydrous Na<sub>2</sub>SO<sub>4</sub>, filtered, and concentrated under reduced pressure. The crude product was purified by flash column chromatography (silica gel, petroleum ether:EtOAc = 100:1) to give dysiherbol D (**9**) (3.6 mg, 11.7  $\mu\text{mol}$ , 50%).

**Characterization of dysiherbol D (9):**

**Physical state:** white foam;

**TLC:**  $R_f$  = 0.42 (silica gel, petroleum ether:EtOAc = 10:1);

**Optical rotation:**  $[\alpha]_D^{23} = +40.3$  ( $c = 0.5$ , MeOH);

**FT-IR (KBr):**  $\nu_{\text{max}} = 3367, 3024, 2919, 2851, 1489, 1461, 1380, 1259, 1197, 1161, 1097, 1080, 962, 893, 801 \text{ cm}^{-1}$ ;

**<sup>1</sup>H NMR (400 MHz, CDCl<sub>3</sub>):**  $\delta = 6.52$  (d,  $J = 8.5$  Hz, 1H), 6.45 (d,  $J = 8.5$  Hz, 1H), 5.82 (ddd,  $J = 9.7, 5.3, 2.1$  Hz, 1H), 5.37 (ddd,  $J = 9.7, 2.8, 1.2$  Hz, 1H), 4.20 (s, 1H), 2.64 (d,  $J = 15.2$  Hz, 1H), 2.60 (d,  $J = 15.2$  Hz, 1H), 2.46 (dt,  $J = 17.6, 2.5$  Hz, 1H), 2.00 (dd,  $J = 17.6, 5.3$  Hz, 1H), 1.44–1.37 (m, 1H), 1.37–1.26 (m, 3H), 1.35 (s, 4H), 1.13 (s, 3H), 1.11 (s, 3H), 1.11–1.06 (m, 1H), 0.82 (d,  $J = 6.8$  Hz, 3H) ppm;

**<sup>13</sup>C NMR (101 MHz, CDCl<sub>3</sub>):**  $\delta = 146.2, 145.8, 135.7, 129.7, 129.7, 126.5, 115.0, 113.4, 80.0, 51.9, 49.1, 39.5, 36.3, 35.3, 32.1, 29.5, 26.4, 19.9, 18.2, 17.8, 15.8$  ppm;

**HRMS (ESI-TOF):** calcd for C<sub>21</sub>H<sub>27</sub>O<sub>2</sub><sup>+</sup> [M+H]<sup>+</sup> 311.2006, found 311.2002.

### III. Comparison of Spectroscopic Data of Natural and Synthetic (+)-Dysiherbols A–E.

**Table S1. Comparison of <sup>1</sup>H NMR spectroscopic data (CDCl<sub>3</sub>) of natural and synthetic (+)-dysiherbol A (6).**

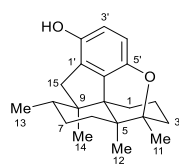

**6: (+)-dysiherbol A**  
(revised structure)

| Position    | Natural <sup>5</sup>                                                                    | Synthetic                                                                               | Deviation                                   |
|-------------|-----------------------------------------------------------------------------------------|-----------------------------------------------------------------------------------------|---------------------------------------------|
|             | $\delta$ <sup>1</sup> H [ppm; mult; <i>J</i> (Hz)]<br>600 MHz, CDCl <sub>3</sub> , 7.26 | $\delta$ <sup>1</sup> H [ppm; mult; <i>J</i> (Hz)]<br>400 MHz, CDCl <sub>3</sub> , 7.26 | (synthetic–natural)<br>$\Delta\delta$ (ppm) |
| 1 $\alpha$  | 1.84; td; 12.6, 4.8                                                                     | 1.84; td; 12.8, 4.6                                                                     | 0                                           |
| 1 $\beta$   | 1.22; m                                                                                 | 1.23–1.22; m                                                                            | -                                           |
| 2 $\alpha$  | 1.49; m                                                                                 | 1.54–1.46; m                                                                            | -                                           |
| 2 $\beta$   | 1.30; m                                                                                 | 1.32–1.30; m                                                                            | -                                           |
| 3 $\alpha$  | 1.36; td; 13.2, 4.2                                                                     | 1.37–1.33; m                                                                            | -                                           |
| 3 $\beta$   | 1.28; m                                                                                 | 1.30–1.27; m                                                                            | -                                           |
| 6 $\alpha$  | 1.68; dd; 14.4, 6.0                                                                     | 1.68; dd; 15.0, 5.8                                                                     | 0                                           |
| 6 $\beta$   | 1.95; td; 13.8, 6.6                                                                     | 1.96; td; 13.9, 6.5                                                                     | 0.01                                        |
| 7 $\alpha$  | 1.32; m                                                                                 | 1.34–1.32; m                                                                            | -                                           |
| 7 $\beta$   | 1.37; m                                                                                 | 1.42–1.37; m                                                                            | -                                           |
| 8           | 1.24; m                                                                                 | 1.26–1.23; m                                                                            | -                                           |
| 11          | 1.22; s                                                                                 | 1.22; s                                                                                 | 0                                           |
| 12          | 1.21; s                                                                                 | 1.21; s                                                                                 | 0                                           |
| 13          | 0.83; d; 6.6                                                                            | 0.83; d; 6.5                                                                            | 0                                           |
| 14          | 1.07; s                                                                                 | 1.08; s                                                                                 | 0.01                                        |
| 15 $\alpha$ | 2.57; d; 14.4                                                                           | 2.57; d; 15.4                                                                           | 0                                           |
| 15 $\beta$  | 2.54; d; 14.4                                                                           | 2.53; d; 15.4                                                                           | -0.01                                       |
| 3'          | 6.49; d; 8.4                                                                            | 6.49; d; 8.5                                                                            | 0                                           |
| 4'          | 6.43; d; 8.4                                                                            | 6.42; d; 8.5                                                                            | -0.01                                       |
| 2'-OH       | 4.23; br s                                                                              | 4.24; s                                                                                 | 0.01                                        |



**Table S2. Comparison of  $^{13}\text{C}$  NMR spectroscopic data ( $\text{CDCl}_3$ ) of natural and synthetic (+)-dysiherbol A (**6**).**

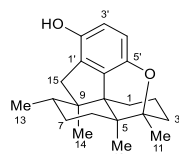

**6:** (+)-dysiherbol A  
(revised structure)

| Position | Natural <sup>5</sup>                | Synthetic                           | Deviation            |                                   |
|----------|-------------------------------------|-------------------------------------|----------------------|-----------------------------------|
|          | $\delta^{13}\text{C}$ [ppm] 150 MHz | $\delta^{13}\text{C}$ [ppm] 101 MHz | (synthetic–natural)  |                                   |
|          | $\text{CDCl}_3$ , 77.00             | $\text{CDCl}_3$ , 77.16             | $\Delta\delta$ (ppm) | $\Delta\delta$ (ppm) <sup>a</sup> |
| 1        | 26.41                               | 26.58                               | 0.17                 | 0                                 |
| 2        | 19.7                                | 19.9                                | 0.2                  | 0                                 |
| 3        | 29.9                                | 30.1                                | 0.2                  | 0                                 |
| 4        | 82.4                                | 82.5                                | 0.2                  | 0                                 |
| 5        | 37.2                                | 37.4                                | 0.2                  | 0                                 |
| 6        | 35.7                                | 35.8                                | 0.2                  | 0                                 |
| 7        | 26.36                               | 26.52                               | 0.16                 | 0                                 |
| 8        | 35.5                                | 35.6                                | 0.1                  | 0                                 |
| 9        | 51.9                                | 52.0                                | 0.1                  | –0.1                              |
| 10       | 49.1                                | 49.3                                | 0.2                  | 0                                 |
| 11       | 21.9                                | 22.1                                | 0.2                  | 0                                 |
| 12       | 18.5                                | 18.6                                | 0.1                  | 0                                 |
| 13       | 17.8                                | 17.9                                | 0.1                  | 0                                 |
| 14       | 14.9                                | 15.0                                | 0.1                  | 0                                 |
| 15       | 39.3                                | 39.5                                | 0.2                  | 0                                 |
| 1'       | 125.8                               | 126.0                               | 0.2                  | 0.1                               |
| 2'       | 145.5                               | 145.7                               | 0.2                  | 0.1                               |
| 3'       | 114.2                               | 114.4                               | 0.2                  | 0.1                               |
| 4'       | 111.1                               | 111.2                               | 0.1                  | 0                                 |
| 5'       | 148.3                               | 148.5                               | 0.2                  | 0                                 |
| 6'       | 133.1                               | 133.2                               | 0.2                  | –0.1                              |

<sup>a</sup>To compare the  $^{13}\text{C}$  NMR spectroscopic data of the synthetic (+)-dysiherbol A (**6**) with the natural one, the internal reference of  $\text{CDCl}_3$  used in the synthetic sample was adjusted from 77.16 ppm to 77.00 ppm, which is consistent with that used in the natural sample.

### Comparison of NMR spectra of natural and synthetic (+)-dysiherbol A (6).

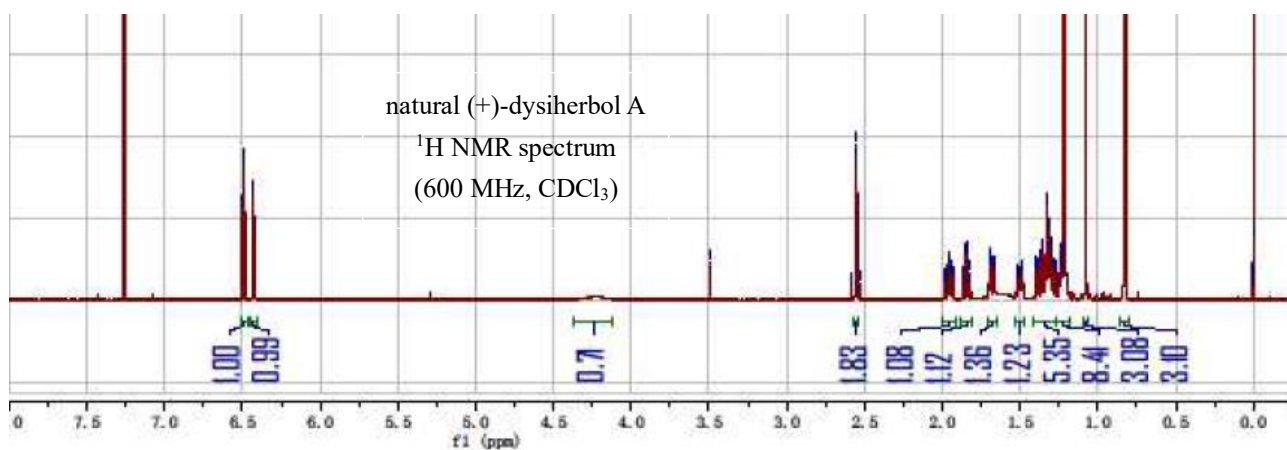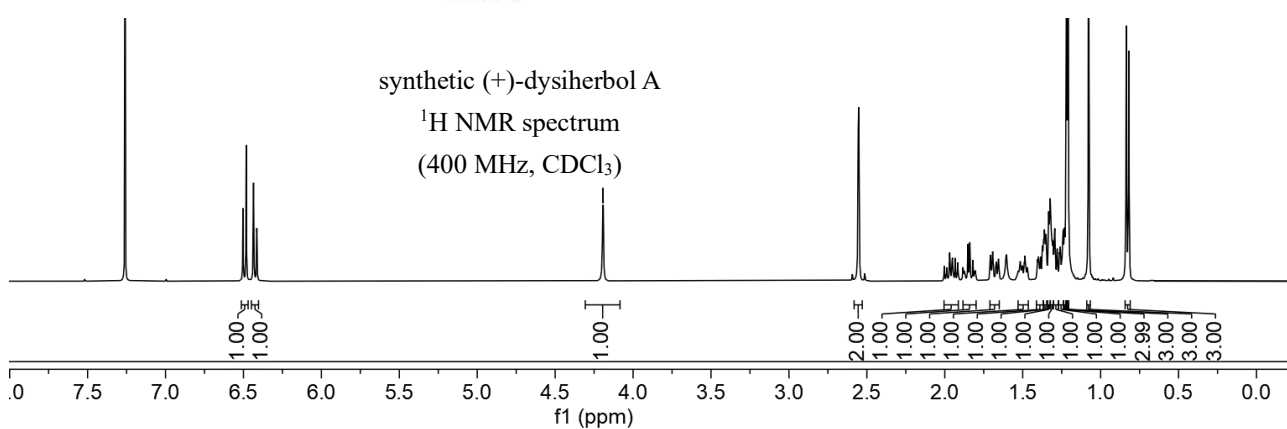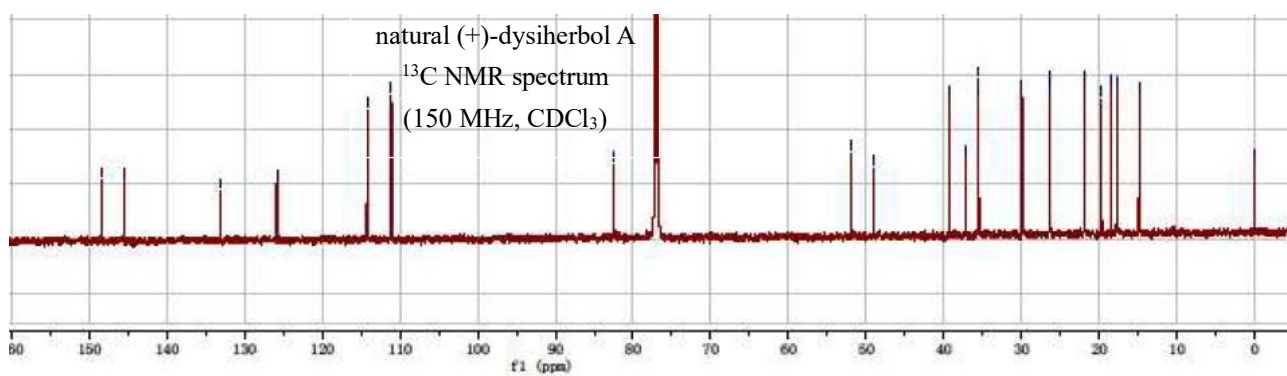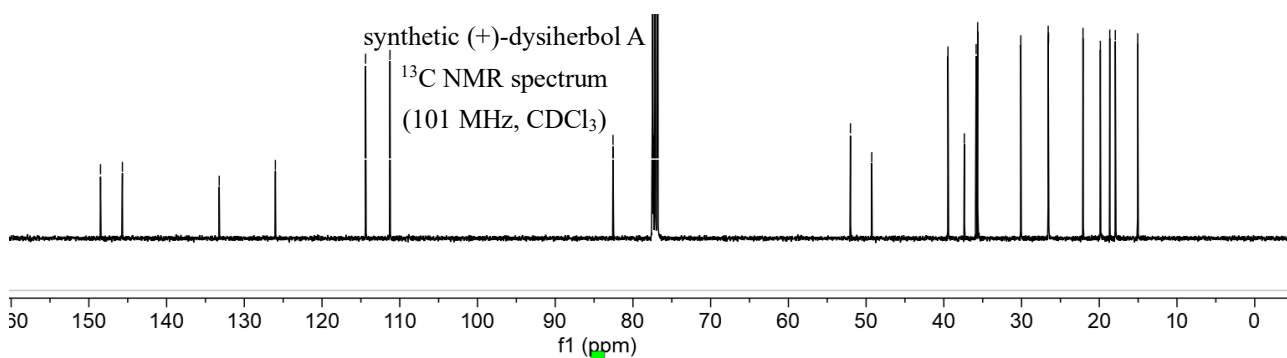

Experimental and calculated ECDs of the revised structure of (+)-dysiherbol A (6).

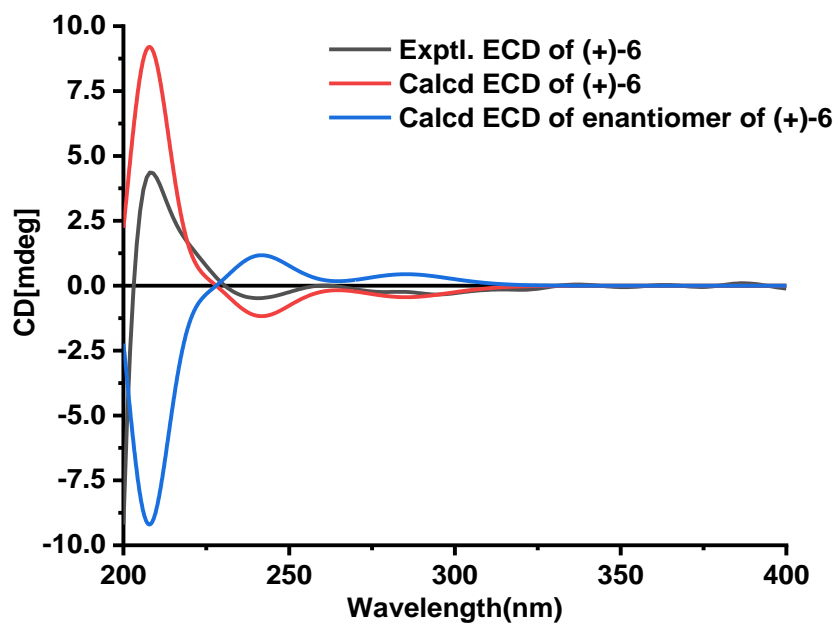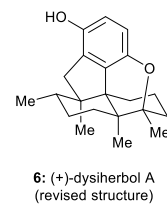

**Table S3. Comparison of <sup>1</sup>H NMR spectroscopic data (pyridine-*d*<sub>5</sub>) of natural and synthetic (+)-dysiherbol B (7).**

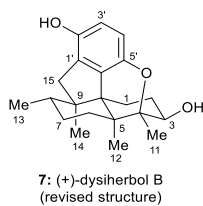

| Position    | Natural <sup>5</sup>                                                                                  | Synthetic                                                                                             | Deviation            |                                   |
|-------------|-------------------------------------------------------------------------------------------------------|-------------------------------------------------------------------------------------------------------|----------------------|-----------------------------------|
|             | $\delta$ <sup>1</sup> H [ppm; mult; <i>J</i> (Hz)]<br>600 MHz, pyridine- <i>d</i> <sub>5</sub> , 8.71 | $\delta$ <sup>1</sup> H [ppm; mult; <i>J</i> (Hz)]<br>400 MHz, pyridine- <i>d</i> <sub>5</sub> , 8.74 | (synthetic–natural)  |                                   |
|             |                                                                                                       |                                                                                                       | $\Delta\delta$ (ppm) | $\Delta\delta$ (ppm) <sup>a</sup> |
| 1 $\alpha$  | 1.85; td; 13.2, 4.4                                                                                   | 1.86; td; 13.1, 4.3                                                                                   | 0.01                 | –0.02                             |
| 1 $\beta$   | 1.39; m                                                                                               | 1.45–1.40; m                                                                                          | -                    | -                                 |
| 2 $\alpha$  | 2.05; m                                                                                               | 2.12–2.04; m                                                                                          | -                    | -                                 |
| 2 $\beta$   | 1.64; td; 12.8, 5.6                                                                                   | 1.68; td; 12.7, 5.2                                                                                   | 0.04                 | 0.01                              |
| 3 $\alpha$  | 4.15; dd; 12.0, 6.4                                                                                   | 4.17; dd; 11.8, 6.3                                                                                   | 0.02                 | –0.01                             |
| 6 $\alpha$  | 1.46; m                                                                                               | 1.54–1.46; m                                                                                          | -                    | -                                 |
| 6 $\beta$   | 1.39; m                                                                                               | 1.40–1.35; m                                                                                          | -                    | -                                 |
| 7 $\alpha$  | 1.30; m                                                                                               | 1.31–1.23; m                                                                                          | -                    | -                                 |
| 7 $\beta$   | 1.09; m                                                                                               | 1.12–1.07; m                                                                                          | -                    | -                                 |
| 8           | 1.31; m                                                                                               | 1.35–1.32; m                                                                                          | -                    | -                                 |
| 11          | 1.58; s                                                                                               | 1.61; s                                                                                               | 0.03                 | 0                                 |
| 12          | 1.12; s                                                                                               | 1.13; s                                                                                               | 0.01                 | –0.02                             |
| 13          | 0.72; d; 6.0                                                                                          | 0.73; d; 6.2                                                                                          | 0.01                 | –0.02                             |
| 14          | 0.97; s                                                                                               | 0.99; s                                                                                               | 0.02                 | –0.01                             |
| 15 $\alpha$ | 2.93; d; 15.2                                                                                         | 2.96; d; 15.2                                                                                         | 0.03                 | 0                                 |
| 15 $\beta$  | 2.74; d; 15.2                                                                                         | 2.76; d; 15.2                                                                                         | 0.02                 | –0.01                             |
| 3'          | 6.91; d; 8.4                                                                                          | 6.92; d; 8.4                                                                                          | 0.01                 | –0.02                             |
| 4'          | 6.62; d; 8.4                                                                                          | 6.64; d; 8.4                                                                                          | 0.02                 | –0.01                             |
| -OH         | -                                                                                                     | 10.61; s                                                                                              | -                    | -                                 |

<sup>a</sup>To compare the <sup>1</sup>H NMR spectroscopic data of the synthetic (+)-dysiherbol B (7) with the natural one, the internal reference of pyridine-*d*<sub>5</sub> used in the synthetic sample was adjusted from 8.74 ppm to 8.71 ppm, which is consistent with that used in the natural sample.

**Table S4. Comparison of  $^{13}\text{C}$  NMR spectroscopic data (pyridine- $d_5$ ) of natural and synthetic (+)-dysiherbol B (7).**



| Position | Natural <sup>5</sup>                                            | Synthetic                                                       | Deviation            |                                   |
|----------|-----------------------------------------------------------------|-----------------------------------------------------------------|----------------------|-----------------------------------|
|          | $\delta^{13}\text{C}$ [ppm] 150 MHz<br>pyridine- $d_5$ , 149.20 | $\delta^{13}\text{C}$ [ppm] 101 MHz<br>pyridine- $d_5$ , 150.35 | (synthetic–natural)  |                                   |
|          |                                                                 |                                                                 | $\Delta\delta$ (ppm) | $\Delta\delta$ (ppm) <sup>a</sup> |
| 1        | 26.7                                                            | 27.8                                                            | 1.1                  | 0                                 |
| 2        | 29.8                                                            | 31.0                                                            | 1.2                  | 0                                 |
| 3        | 71.5                                                            | 72.6                                                            | 1.1                  | –0.1                              |
| 4        | 84.0                                                            | 85.1                                                            | 1.1                  | –0.1                              |
| 5        | 37.2                                                            | 38.3                                                            | 1.1                  | –0.1                              |
| 6        | 30.1                                                            | 31.1                                                            | 1.0                  | –0.1                              |
| 7        | 26.0                                                            | 27.1                                                            | 1.1                  | –0.1                              |
| 8        | 35.1                                                            | 36.2                                                            | 1.1                  | –0.1                              |
| 9        | 51.0                                                            | 52.1                                                            | 1.1                  | –0.1                              |
| 10       | 48.3                                                            | 49.4                                                            | 1.1                  | –0.1                              |
| 11       | 17.1                                                            | 18.2                                                            | 1.1                  | –0.1                              |
| 12       | 17.3                                                            | 18.4                                                            | 1.1                  | –0.1                              |
| 13       | 17.2                                                            | 18.3                                                            | 1.1                  | –0.1                              |
| 14       | 14.5                                                            | 15.5                                                            | 1.0                  | –0.1                              |
| 15       | 40.1                                                            | 41.2                                                            | 1.1                  | –0.1                              |
| 1'       | 126.3                                                           | 127.4                                                           | 1.1                  | –0.1                              |
| 2'       | 148.2                                                           | 149.4                                                           | 1.2                  | 0                                 |
| 3'       | 114.6                                                           | 115.6                                                           | 1.0                  | –0.1                              |
| 4'       | 111.1                                                           | 112.2                                                           | 1.1                  | –0.1                              |
| 5'       | 146.9                                                           | 148.0                                                           | 1.1                  | –0.1                              |
| 6'       | 132.8                                                           | 133.9                                                           | 1.1                  | 0                                 |

<sup>a</sup>To compare the  $^{13}\text{C}$  NMR spectroscopic data of the synthetic (+)-dysiherbol B (7) with the natural one, the internal reference of pyridine- $d_5$  used in the synthetic sample was adjusted from 150.35 ppm to 149.20 ppm, which is consistent with that used in the natural sample.



Experimental and calculated ECDs of the revised structure of (+)-dysiherbol B (7).

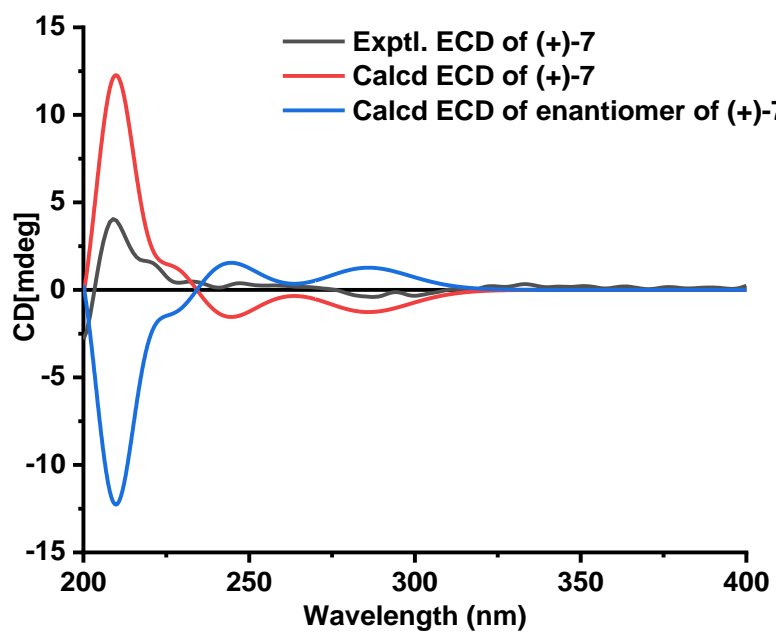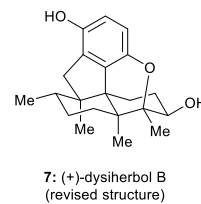

**Table S5. Comparison of <sup>1</sup>H NMR spectroscopic data (CDCl<sub>3</sub>) of natural and synthetic (+)-dysiherbol C (8).**

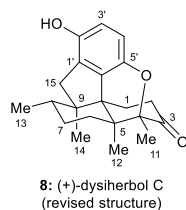

| Position    | Natural <sup>5</sup>                                                                    | Synthetic                                                                               | Deviation                                   |
|-------------|-----------------------------------------------------------------------------------------|-----------------------------------------------------------------------------------------|---------------------------------------------|
|             | $\delta$ <sup>1</sup> H [ppm; mult; <i>J</i> (Hz)]<br>600 MHz, CDCl <sub>3</sub> , 7.26 | $\delta$ <sup>1</sup> H [ppm; mult; <i>J</i> (Hz)]<br>400 MHz, CDCl <sub>3</sub> , 7.26 | (synthetic–natural)<br>$\Delta\delta$ (ppm) |
| 1 $\alpha$  | 2.09; m                                                                                 | 2.12–2.04; m                                                                            | -                                           |
| 1 $\beta$   | 1.74; m                                                                                 | 1.80–1.69; m                                                                            | -                                           |
| 2 $\alpha$  | 2.39; dd; 14.4, 4.8                                                                     | 2.38; dd; 12.0, 4.8                                                                     | -0.01                                       |
| 2 $\beta$   | 2.16; m                                                                                 | 2.20–2.12; m                                                                            | -                                           |
| 6 $\alpha$  | 1.37; m                                                                                 | 1.40–1.37; m                                                                            | -                                           |
| 6 $\beta$   | 1.31; m                                                                                 | 1.33–1.31; m                                                                            | -                                           |
| 7 $\alpha$  | 1.28; m                                                                                 | 1.31–1.27; m                                                                            | -                                           |
| 7 $\beta$   | 1.34; m                                                                                 | 1.37–1.34; m                                                                            | -                                           |
| 8           | 1.24; m                                                                                 | 1.27–1.23; m                                                                            | -                                           |
| 11          | 1.33; s                                                                                 | 1.33; s                                                                                 | 0                                           |
| 12          | 1.03; s                                                                                 | 1.02; s                                                                                 | -0.01                                       |
| 13          | 0.87; d; 6.6                                                                            | 0.87; d; 6.4                                                                            | 0                                           |
| 14          | 1.12; s                                                                                 | 1.12; s                                                                                 | 0                                           |
| 15 $\alpha$ | 2.70; d; 12.6                                                                           | 2.69; d; 15.3                                                                           | -0.01                                       |
| 15 $\beta$  | 2.65; d; 12.6                                                                           | 2.64; d; 15.3                                                                           | -0.01                                       |
| 3'          | 6.58; d; 8.4                                                                            | 6.58; d; 8.5                                                                            | 0                                           |
| 4'          | 6.53; d; 8.4                                                                            | 6.53; d; 8.5                                                                            | 0                                           |
| 2'-OH       | 4.38; br s                                                                              | 4.24; s                                                                                 | -0.14                                       |



**Table S6. Comparison of  $^{13}\text{C}$  NMR spectroscopic data ( $\text{CDCl}_3$ ) of natural and synthetic (+)-dysiherbol C (**8**).**



| Position | Natural <sup>5</sup>                                           | Synthetic                                                      | Deviation            |                                   |
|----------|----------------------------------------------------------------|----------------------------------------------------------------|----------------------|-----------------------------------|
|          | $\delta^{13}\text{C}$ [ppm] 150 MHz<br>$\text{CDCl}_3$ , 77.00 | $\delta^{13}\text{C}$ [ppm] 101 MHz<br>$\text{CDCl}_3$ , 77.16 | (synthetic–natural)  |                                   |
|          |                                                                |                                                                | $\Delta\delta$ (ppm) | $\Delta\delta$ (ppm) <sup>a</sup> |
| 1        | 29.2                                                           | 29.4                                                           | 0.2                  | 0                                 |
| 2        | 36.6                                                           | 36.8                                                           | 0.2                  | 0                                 |
| 3        | 206.2                                                          | 206.6                                                          | 0.4                  | 0.2                               |
| 4        | 86.2                                                           | 86.3                                                           | 0.1                  | -0.1                              |
| 5        | 38.0                                                           | 38.1                                                           | 0.1                  | -0.1                              |
| 6        | 30.3                                                           | 30.5                                                           | 0.2                  | 0                                 |
| 7        | 26.3                                                           | 26.5                                                           | 0.2                  | 0                                 |
| 8        | 35.6                                                           | 35.7                                                           | 0.1                  | 0                                 |
| 9        | 52.5                                                           | 52.6                                                           | 0.1                  | -0.1                              |
| 10       | 48.1                                                           | 48.2                                                           | 0.1                  | 0                                 |
| 11       | 14.5                                                           | 14.7                                                           | 0.2                  | 0                                 |
| 12       | 18.4                                                           | 18.6                                                           | 0.2                  | 0                                 |
| 13       | 17.5                                                           | 17.7                                                           | 0.2                  | 0                                 |
| 14       | 15.3                                                           | 15.5                                                           | 0.2                  | 0                                 |
| 15       | 39.4                                                           | 39.6                                                           | 0.2                  | 0                                 |
| 1'       | 125.9                                                          | 126.1                                                          | 0.2                  | 0                                 |
| 2'       | 146.4                                                          | 146.6                                                          | 0.2                  | 0                                 |
| 3'       | 115.5                                                          | 115.6                                                          | 0.2                  | 0                                 |
| 4'       | 112.7                                                          | 112.8                                                          | 0.2                  | 0                                 |
| 5'       | 145.6                                                          | 145.7                                                          | 0.2                  | -0.1                              |
| 6'       | 131.8                                                          | 132.0                                                          | 0.2                  | 0                                 |

<sup>a</sup>To compare the  $^{13}\text{C}$  NMR spectroscopic data of the synthetic (+)-dysiherbol C (**8**) with the natural one, the internal reference of  $\text{CDCl}_3$  used in the synthetic sample was adjusted from 77.16 ppm to 77.00 ppm, which is consistent with that used in the natural sample.

### Comparison of NMR spectra of natural and synthetic (+)-dysiherbol C (8).

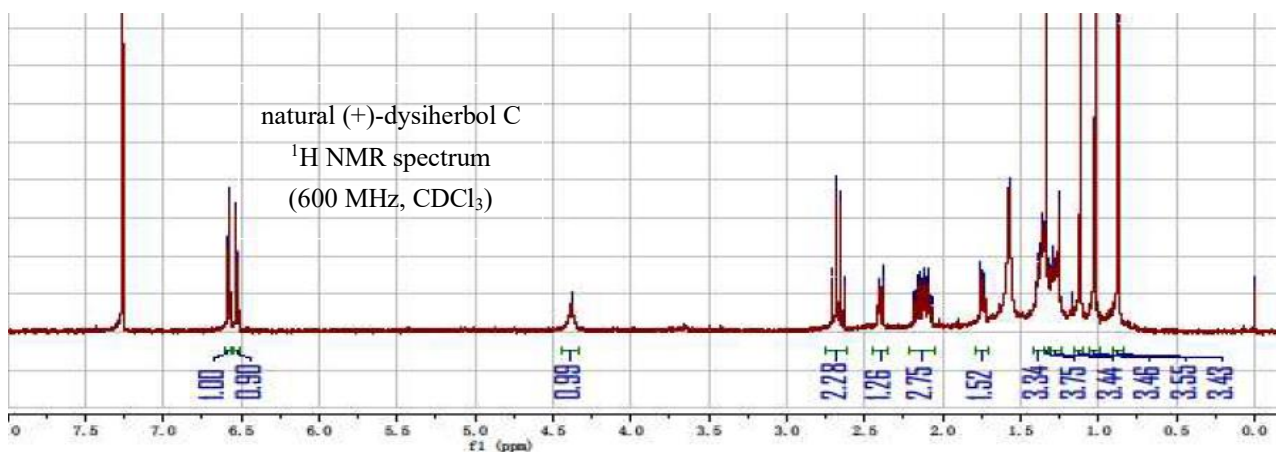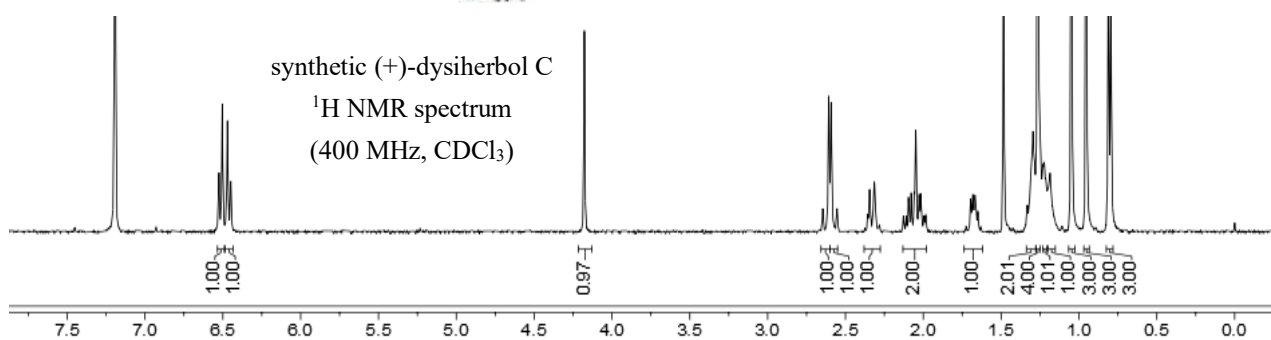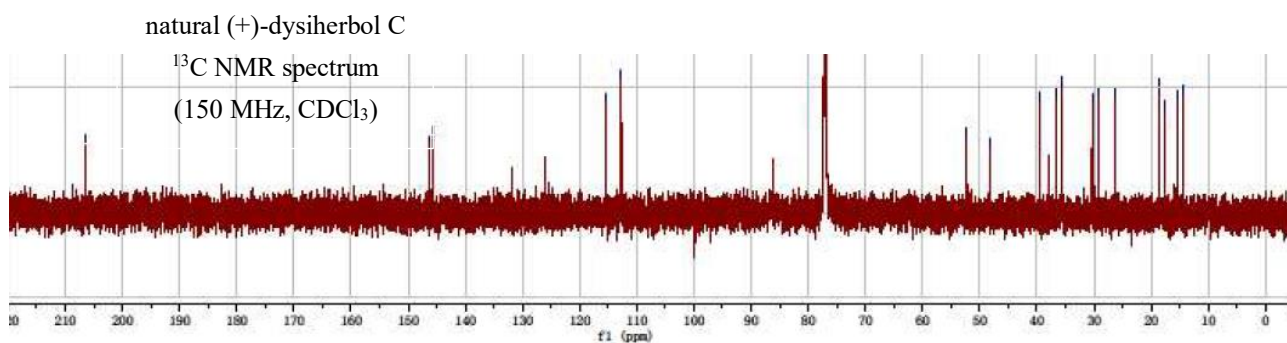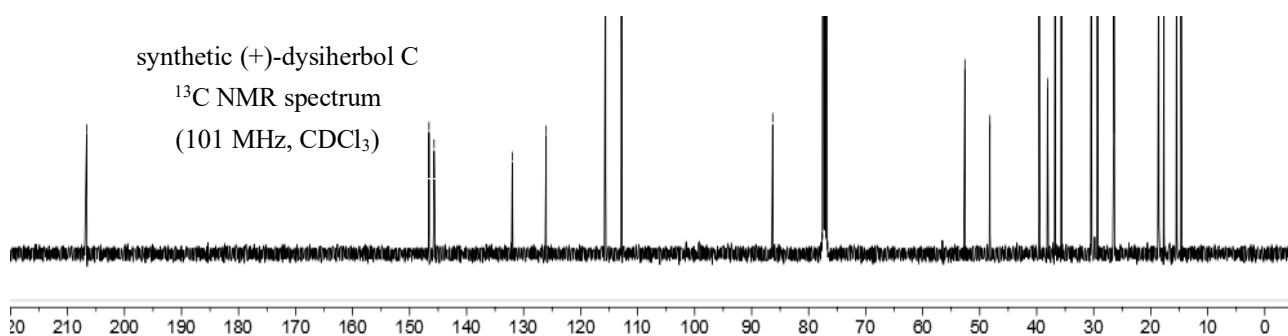

Experimental and calculated ECDs of the revised structure of (+)-dysiherbol C (8).

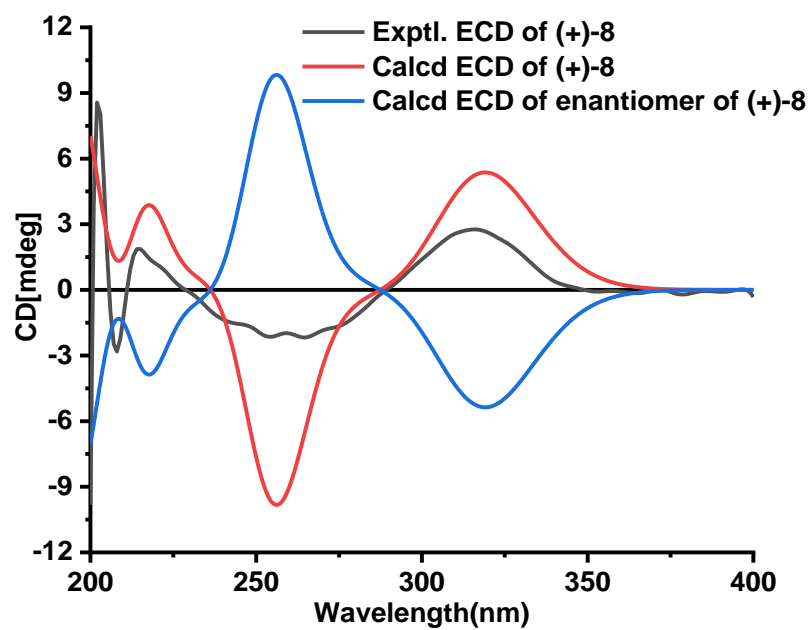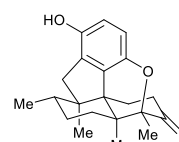

8: (+)-dysiherbol C  
(revised structure)

**Table S7. Comparison of <sup>1</sup>H NMR spectroscopic data (CDCl<sub>3</sub>) of natural and synthetic (+)-dysiherbol D (9).**

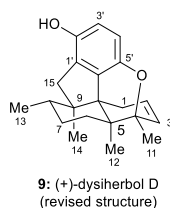

| Position    | Natural <sup>6</sup>                                                                    | Synthetic                                                                               | Deviation                                   |
|-------------|-----------------------------------------------------------------------------------------|-----------------------------------------------------------------------------------------|---------------------------------------------|
|             | $\delta$ <sup>1</sup> H [ppm; mult; <i>J</i> (Hz)]<br>600 MHz, CDCl <sub>3</sub> , 7.26 | $\delta$ <sup>1</sup> H [ppm; mult; <i>J</i> (Hz)]<br>400 MHz, CDCl <sub>3</sub> , 7.26 | (synthetic–natural)<br>$\Delta\delta$ (ppm) |
| 1 $\alpha$  | 2.00; dd; 17.4, 4.8                                                                     | 2.00; dd; 17.6, 5.3                                                                     | 0                                           |
| 1 $\beta$   | 2.45; d; 18.0                                                                           | 2.46; d; 17.6                                                                           | 0.01                                        |
| 2           | 5.82; ddd; 9.6, 5.4, 1.8                                                                | 5.82; ddd; 9.7, 5.3, 2.0                                                                | 0                                           |
| 3           | 5.37; dd; 9.6, 2.4                                                                      | 5.37; ddd; 9.7, 2.8, 1.2                                                                | 0                                           |
| 6 $\alpha$  | 1.41; dd; 9.0, 3.6                                                                      | 1.44–1.37; m                                                                            | -                                           |
| 6 $\beta$   | 1.32; m                                                                                 | 1.37–1.26; m                                                                            | -                                           |
| 7 $\alpha$  | 1.32; m                                                                                 | 1.37–1.26; m                                                                            | -                                           |
| 7 $\beta$   | 1.32; m                                                                                 | 1.37–1.26; m                                                                            | -                                           |
| 8           | 1.08; m                                                                                 | 1.11–1.06; m                                                                            | -                                           |
| 11          | 1.35; s                                                                                 | 1.35; s                                                                                 | 0                                           |
| 12          | 1.11; s                                                                                 | 1.11; s                                                                                 | 0                                           |
| 13          | 0.82; d; 6.8                                                                            | 0.82; d; 6.8                                                                            | 0                                           |
| 14          | 1.13; s                                                                                 | 1.11; s                                                                                 | -0.02                                       |
| 15 $\alpha$ | 2.59; d; 15.2                                                                           | 2.60; d; 15.2                                                                           | 0.01                                        |
| 15 $\beta$  | 2.63; d; 15.2                                                                           | 2.64; d; 15.2                                                                           | 0.01                                        |
| 3'          | 6.52; d; 9.0                                                                            | 6.52; d; 9.5                                                                            | 0                                           |
| 4'          | 6.45; d; 8.4                                                                            | 6.45; d; 8.5                                                                            | 0                                           |
| 2'-OH       | -                                                                                       | 4.20, s                                                                                 | -                                           |

**Table S8. Comparison of  $^{13}\text{C}$  NMR spectroscopic data ( $\text{CDCl}_3$ ) of natural and synthetic (+)-dysiherbol D (**9**).**

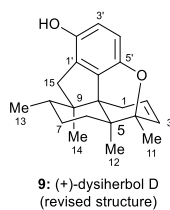

| Position | Natural <sup>6</sup>                                           | Synthetic                                                      | Deviation            |                                   |
|----------|----------------------------------------------------------------|----------------------------------------------------------------|----------------------|-----------------------------------|
|          | $\delta^{13}\text{C}$ [ppm] 150 MHz<br>$\text{CDCl}_3$ , 77.00 | $\delta^{13}\text{C}$ [ppm] 101 MHz<br>$\text{CDCl}_3$ , 77.16 | (synthetic–natural)  |                                   |
|          |                                                                |                                                                | $\Delta\delta$ (ppm) | $\Delta\delta$ (ppm) <sup>a</sup> |
| 1        | 32.1                                                           | 32.1                                                           | 0                    | –0.2                              |
| 2        | 129.7                                                          | 129.7                                                          | 0                    | –0.1                              |
| 3        | 129.7                                                          | 129.7                                                          | 0                    | –0.1                              |
| 4        | 80.0                                                           | 80.0                                                           | 0                    | –0.1                              |
| 5        | 36.3                                                           | 36.3                                                           | 0                    | –0.1                              |
| 6        | 29.5                                                           | 29.5                                                           | 0                    | –0.2                              |
| 7        | 26.4                                                           | 26.4                                                           | 0                    | –0.1                              |
| 8        | 35.3                                                           | 35.3                                                           | 0                    | –0.1                              |
| 9        | 51.9                                                           | 51.9                                                           | 0                    | –0.2                              |
| 10       | 49.1                                                           | 49.1                                                           | 0                    | –0.1                              |
| 11       | 19.8                                                           | 19.9                                                           | 0.1                  | –0.1                              |
| 12       | 18.2                                                           | 18.2                                                           | 0                    | –0.2                              |
| 13       | 17.8                                                           | 17.8                                                           | 0                    | –0.1                              |
| 14       | 15.9                                                           | 15.8                                                           | –0.1                 | –0.3                              |
| 15       | 39.5                                                           | 39.5                                                           | 0                    | –0.2                              |
| 1'       | 126.5                                                          | 126.5                                                          | 0                    | –0.2                              |
| 2'       | 146.2                                                          | 146.2                                                          | 0                    | –0.2                              |
| 3'       | 115.0                                                          | 115.0                                                          | 0                    | –0.2                              |
| 4'       | 113.3                                                          | 113.4                                                          | 0.1                  | –0.1                              |
| 5'       | 145.7                                                          | 145.7                                                          | 0                    | –0.1                              |
| 6'       | 135.7                                                          | 135.7                                                          | 0                    | –0.1                              |

<sup>a</sup>To compare the  $^{13}\text{C}$  NMR spectroscopic data of the synthetic (+)-dysiherbol D (**9**) with the natural one, the internal reference of  $\text{CDCl}_3$  used in the synthetic sample was adjusted from 77.16 ppm to 77.00 ppm, which is consistent with that used in the natural sample.

Experimental and calculated ECDs of the revised structure of (+)-dysiherbol D (9).

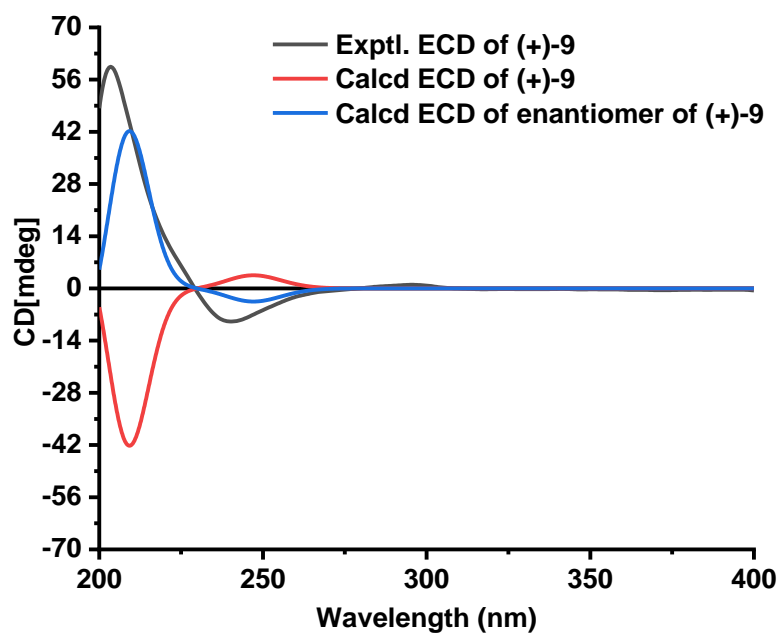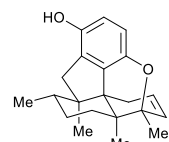

9: (+)-dysiherbol D (revised structure)

**Table S9. Comparison of  $^1\text{H}$  NMR spectroscopic data ( $\text{CDCl}_3$ ) of natural and synthetic (+)-dysiherbol E (10).**

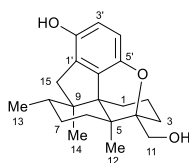

**10:** (+)-dysiherbol E  
(revised structure)

| Position    | Natural <sup>6</sup>                                                           | Synthetic                                                                      | Deviation                                   |
|-------------|--------------------------------------------------------------------------------|--------------------------------------------------------------------------------|---------------------------------------------|
|             | $\delta$ $^1\text{H}$ [ppm; mult; $J$ (Hz)]<br>600 MHz, $\text{CDCl}_3$ , 7.26 | $\delta$ $^1\text{H}$ [ppm; mult; $J$ (Hz)]<br>400 MHz, $\text{CDCl}_3$ , 7.26 | (synthetic–natural)<br>$\Delta\delta$ (ppm) |
| 1 $\alpha$  | 1.87; dd; 12.6, 4.2                                                            | 1.87; m                                                                        | 0                                           |
| 1 $\beta$   | 1.34; m;                                                                       | 1.36–1.32; m;                                                                  | -                                           |
| 2           | 1.59; m                                                                        | 1.59; dt; 12.1, 5.4                                                            | 0                                           |
| 3 $\alpha$  | 2.00; dd; 14.4, 5.4                                                            | 2.00; dd; 14.8, 6.1                                                            | 0                                           |
| 3 $\beta$   | 1.83; dd; 14.4, 6.0                                                            | 1.83; m                                                                        | 0                                           |
| 6           | 1.39; m                                                                        | 1.42–1.35; m                                                                   | -                                           |
| 7           | 1.26; m                                                                        | 1.30–1.22; m                                                                   | -                                           |
| 8           | 1.22; m                                                                        | 1.26–1.18; m                                                                   | -                                           |
| 11 $\alpha$ | 3.90; d; 10.8                                                                  | 3.90; d; 11.3                                                                  | 0                                           |
| 11 $\beta$  | 3.52; d; 10.8                                                                  | 3.51; d; 11.3                                                                  | –0.01                                       |
| 12          | 1.24; s                                                                        | 1.24; s                                                                        | 0                                           |
| 13          | 0.82; d; 6.6                                                                   | 0.82; d; 6.4                                                                   | 0                                           |
| 14          | 1.08; s                                                                        | 1.08; s                                                                        | 0                                           |
| 15          | 2.56; s                                                                        | 2.56; s                                                                        | 0                                           |
| 3'          | 6.51, d, 8.4                                                                   | 6.51; d, 8.5                                                                   | 0                                           |
| 4'          | 6.46; d; 8.4                                                                   | 6.46; d; 8.5                                                                   | 0                                           |
| -OH         | -                                                                              | 4.37; s                                                                        | -                                           |

**Table S10. Comparison of  $^{13}\text{C}$  NMR spectroscopic data ( $\text{CDCl}_3$ ) of natural and synthetic (+)-dysiherbol E (**10**).**

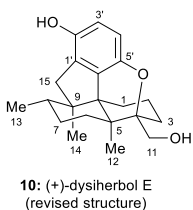

| Position | Natural <sup>6</sup>                                         | Synthetic                                                    | Deviation            |                                   |
|----------|--------------------------------------------------------------|--------------------------------------------------------------|----------------------|-----------------------------------|
|          | $\delta^{13}\text{C}$ [ppm] 150 MHz<br>$\text{CDCl}_3$ 77.00 | $\delta^{13}\text{C}$ [ppm] 101 MHz<br>$\text{CDCl}_3$ 77.16 | (synthetic–natural)  |                                   |
|          |                                                              |                                                              | $\Delta\delta$ (ppm) | $\Delta\delta$ (ppm) <sup>a</sup> |
| 1        | 26.5                                                         | 26.6                                                         | 0.1                  | –0.1                              |
| 2        | 19.2                                                         | 19.3                                                         | 0.1                  | 0                                 |
| 3        | 29.9                                                         | 30.0                                                         | 0.1                  | 0                                 |
| 4        | 83.5                                                         | 83.6                                                         | 0.1                  | –0.1                              |
| 5        | 36.9                                                         | 37.0                                                         | 0.1                  | 0                                 |
| 6        | 30.5                                                         | 30.6                                                         | 0.1                  | 0                                 |
| 7        | 26.3                                                         | 26.4                                                         | 0.1                  | 0                                 |
| 8        | 35.3                                                         | 35.4                                                         | 0.1                  | –0.1                              |
| 9        | 52.1                                                         | 52.2                                                         | 0.1                  | –0.1                              |
| 10       | 49.2                                                         | 49.4                                                         | 0.2                  | 0                                 |
| 11       | 65.6                                                         | 65.8                                                         | 0.2                  | 0                                 |
| 12       | 18.4                                                         | 18.6                                                         | 0.2                  | 0                                 |
| 13       | 17.7                                                         | 17.9                                                         | 0.2                  | 0                                 |
| 14       | 14.9                                                         | 15.1                                                         | 0.2                  | 0                                 |
| 15       | 39.3                                                         | 39.5                                                         | 0.2                  | 0                                 |
| 1'       | 126.0                                                        | 126.2                                                        | 0.2                  | 0                                 |
| 2'       | 146.0                                                        | 146.1                                                        | 0.1                  | 0                                 |
| 3'       | 114.4                                                        | 114.5                                                        | 0.1                  | 0                                 |
| 4'       | 111.3                                                        | 111.4                                                        | 0.1                  | –0.1                              |
| 5'       | 147.6                                                        | 147.7                                                        | 0.1                  | –0.1                              |
| 6'       | 132.9                                                        | 133.1                                                        | 0.2                  | 0                                 |

<sup>a</sup>To compare the  $^{13}\text{C}$  NMR spectroscopic data of the synthetic (+)-dysiherbol E (**10**) with the natural one, the internal reference of  $\text{CDCl}_3$  used in the synthetic sample was adjusted from 77.16 ppm to 77.00 ppm, which is consistent with that used in the natural sample.



Experimental and calculated ECDs of the revised structure of (+)-dysiherbol E (10).

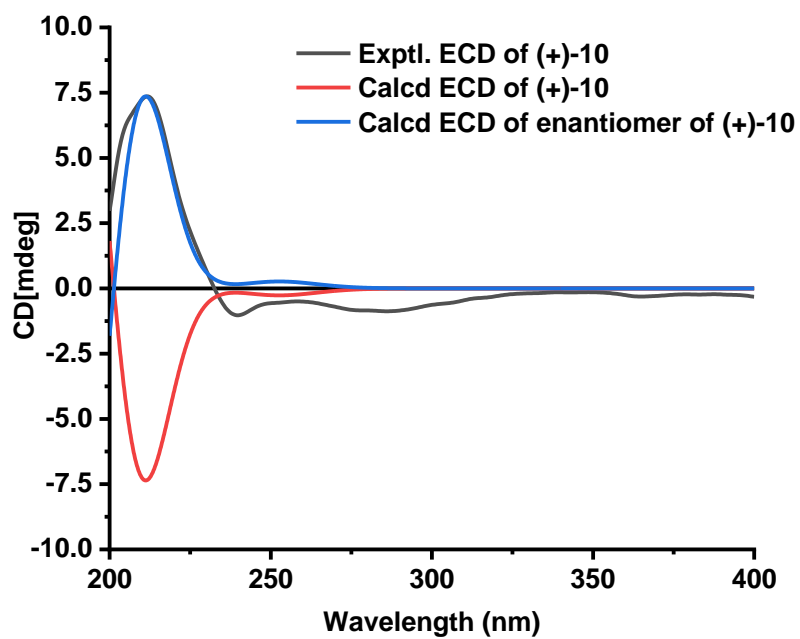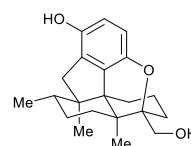

10: (+)-dysiherbol E  
(revised structure)

#### IV. $^1\text{H}$ NMR and $^{13}\text{C}$ NMR Spectra of Compounds

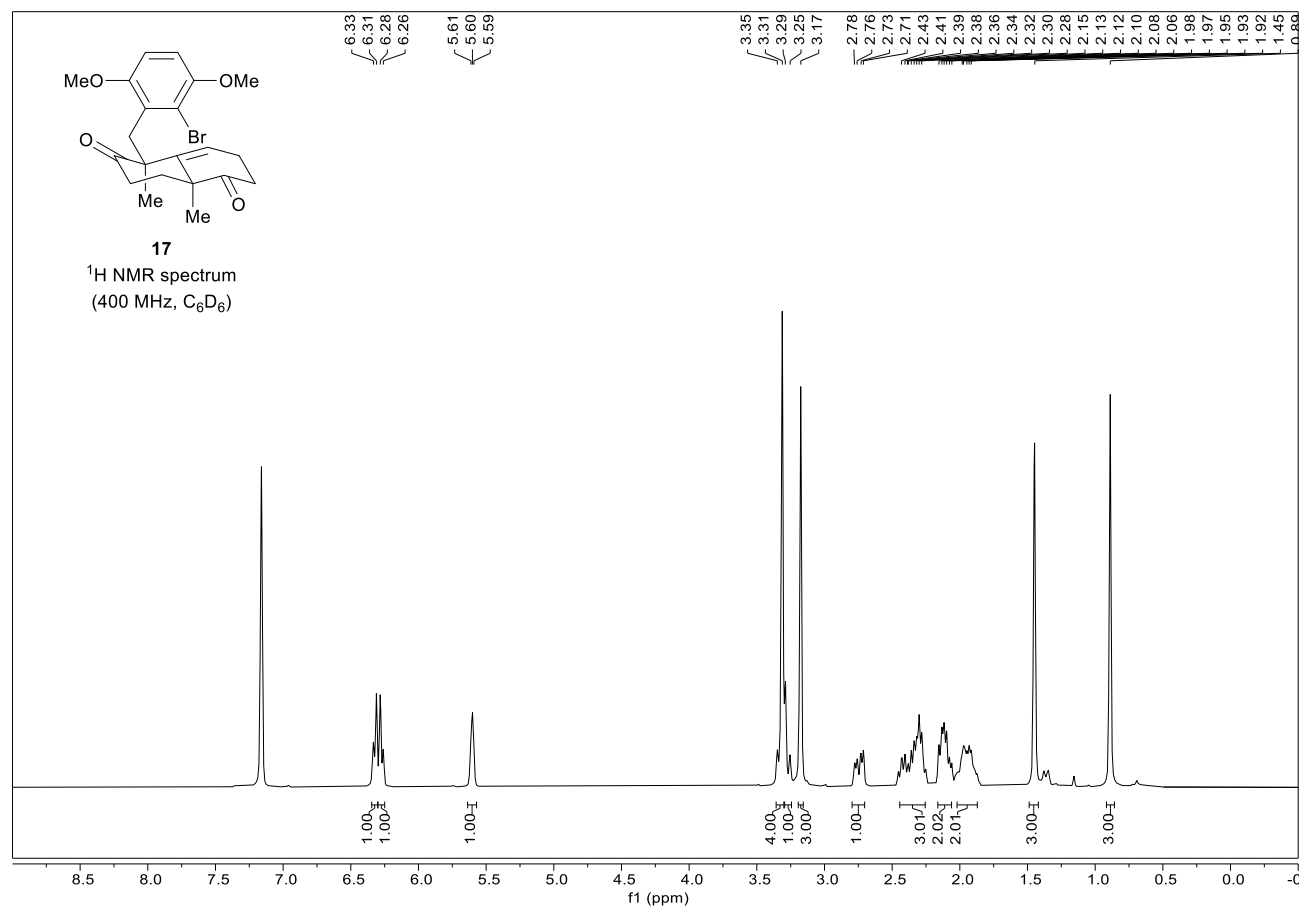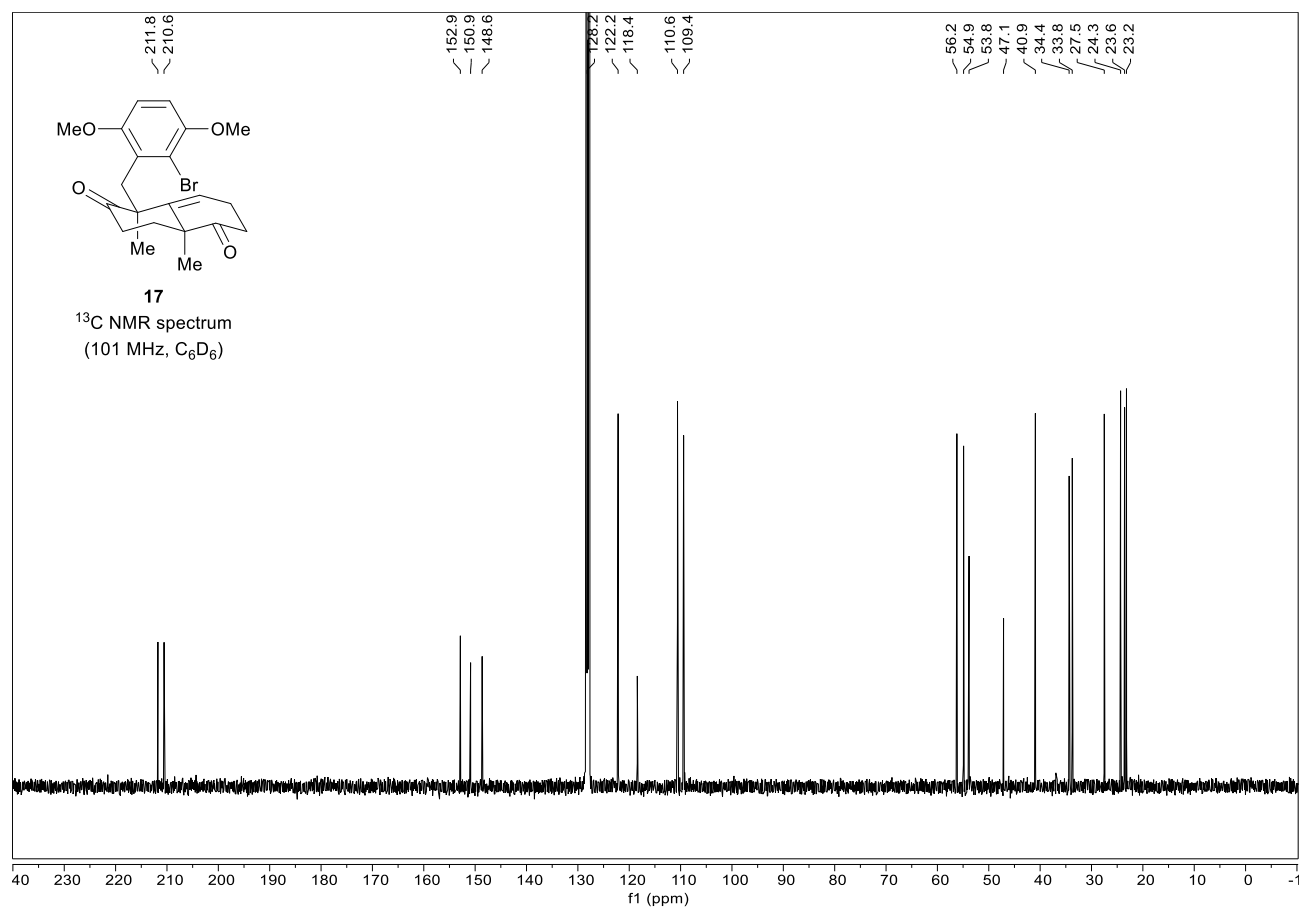

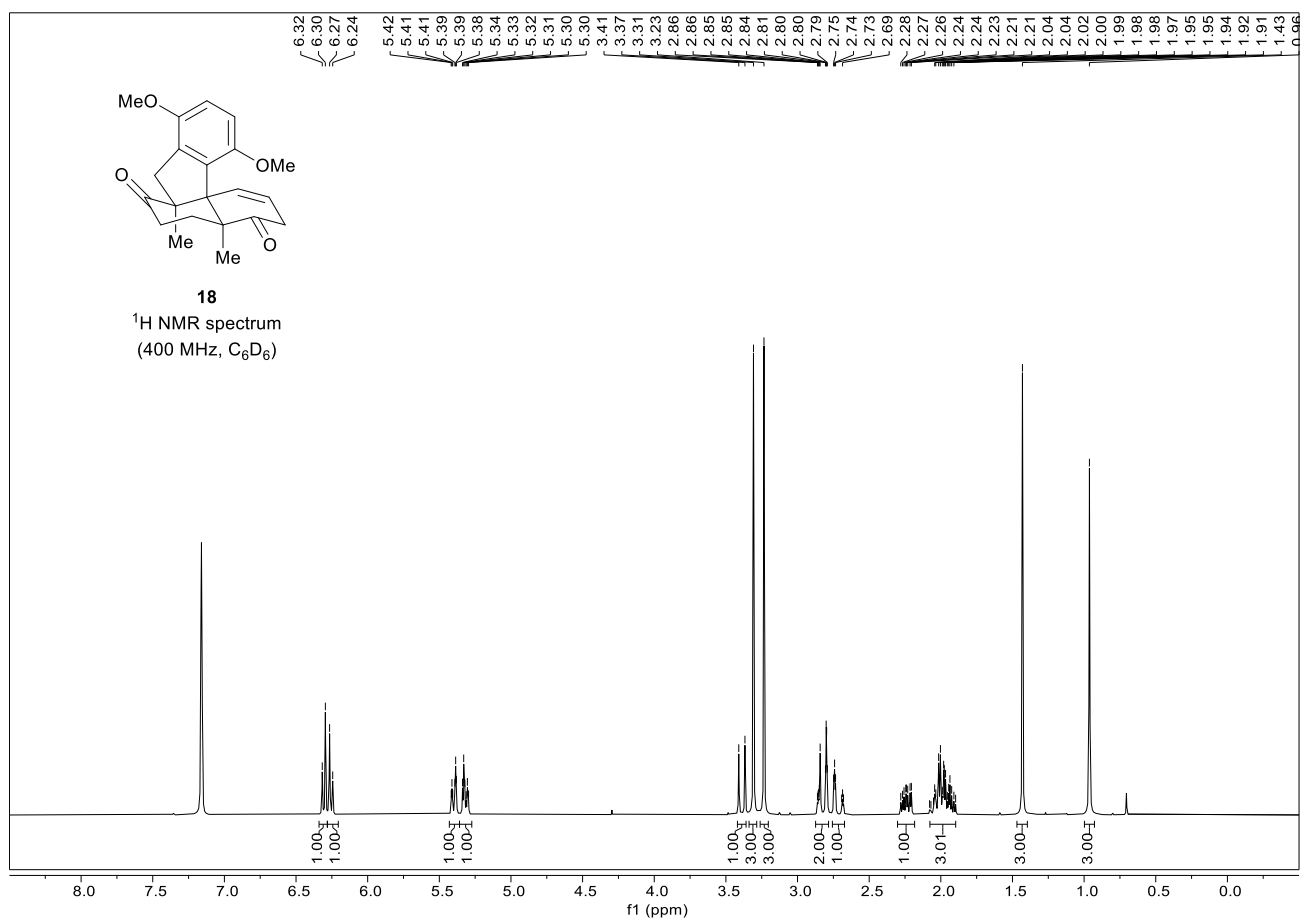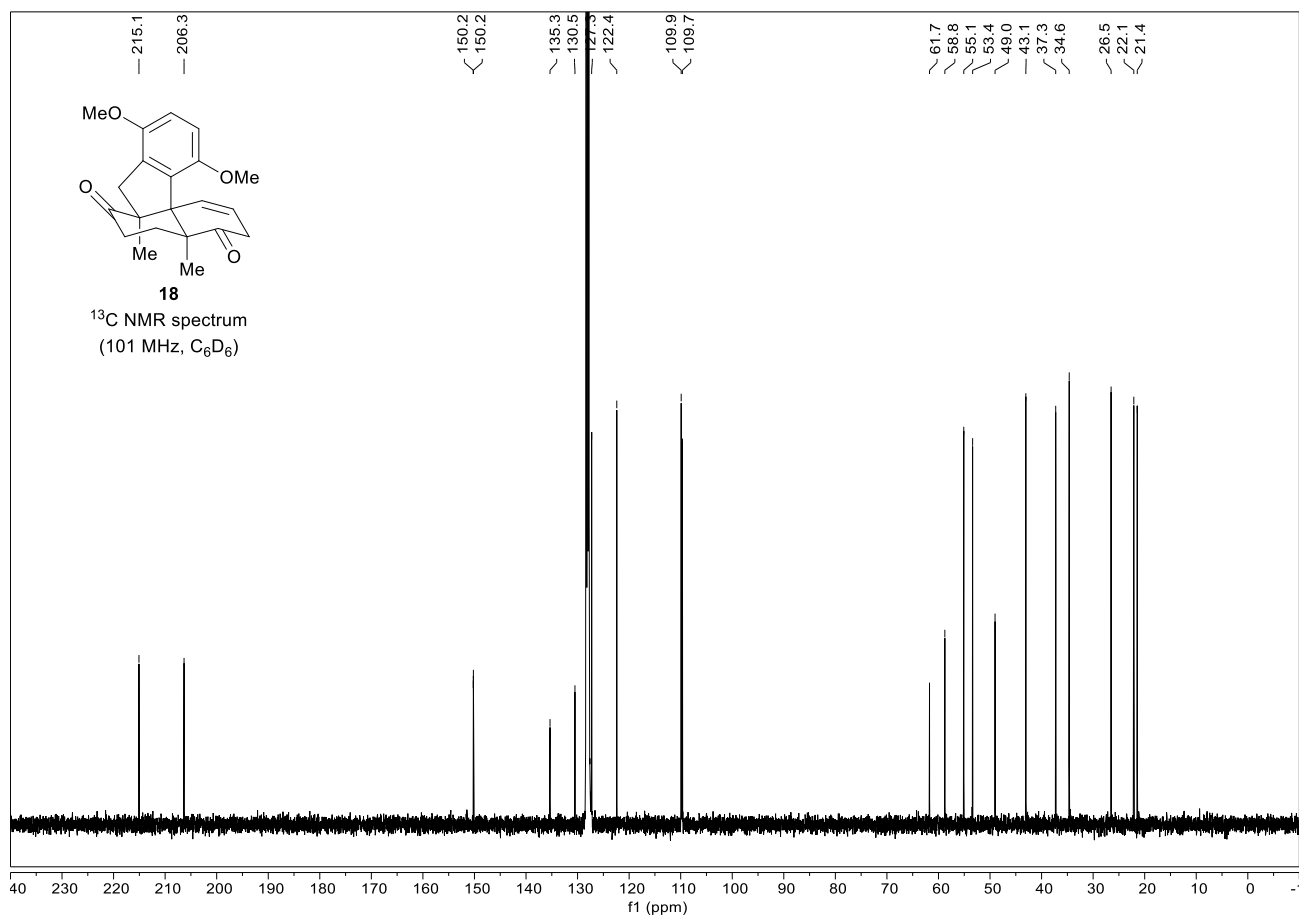

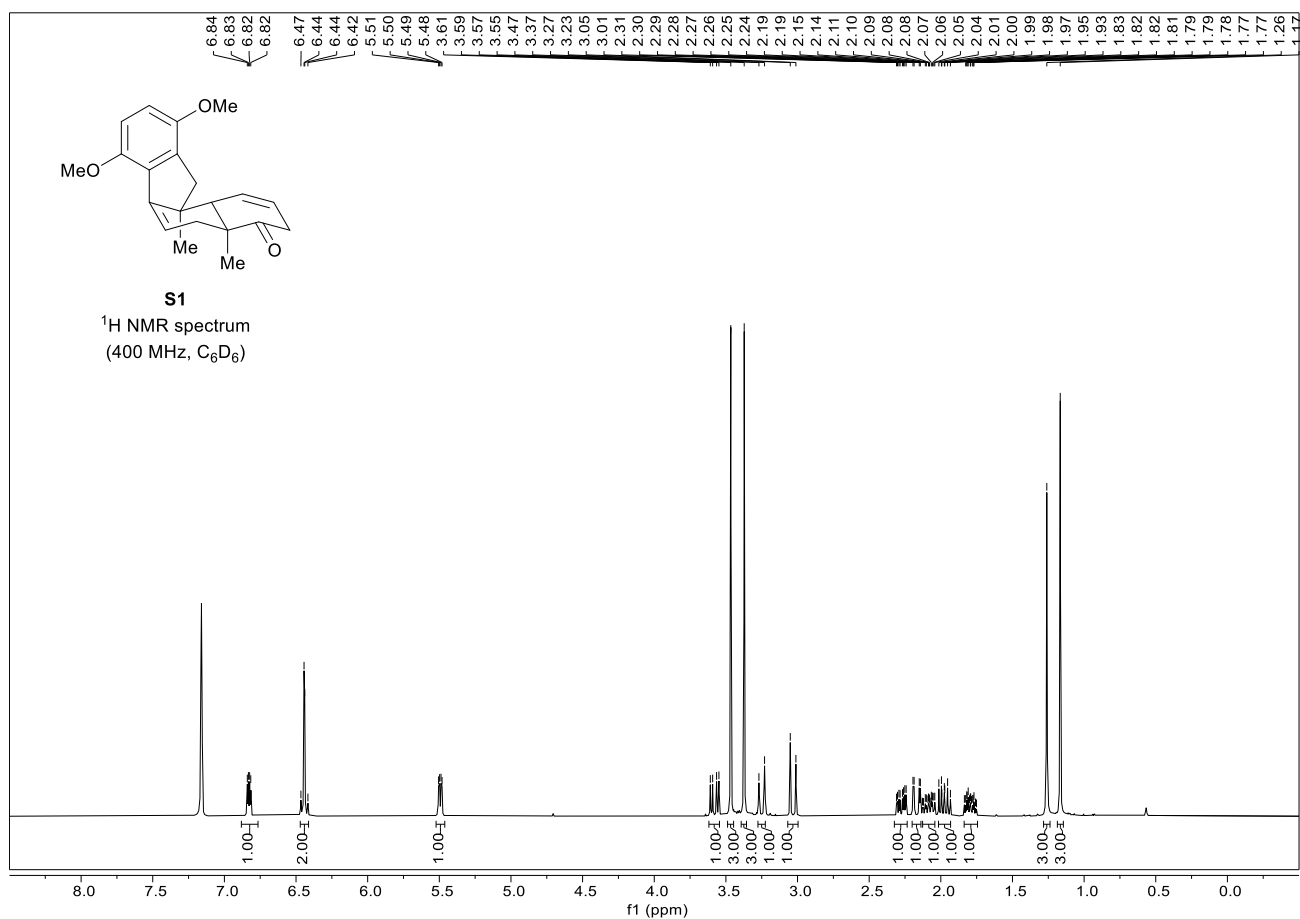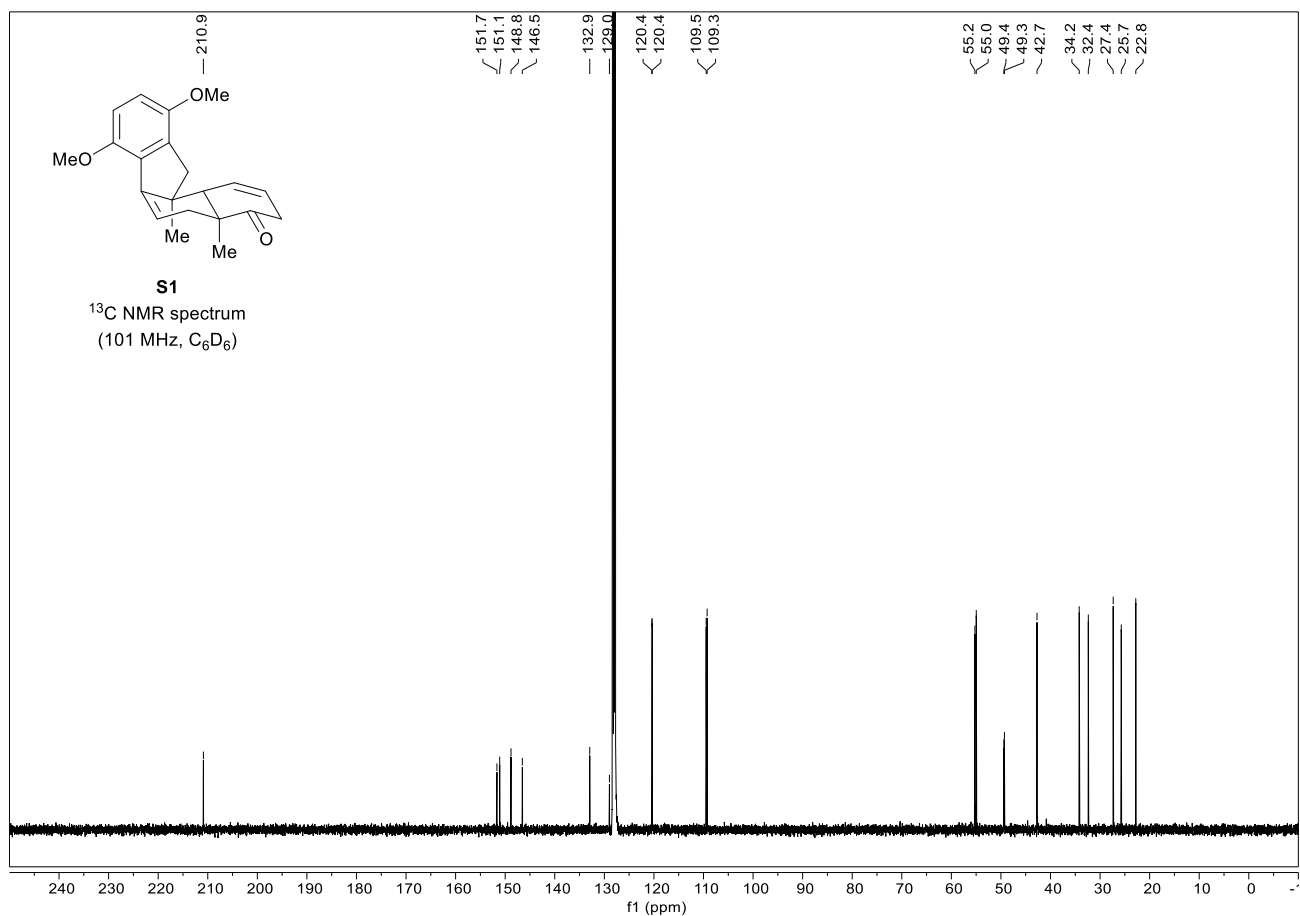

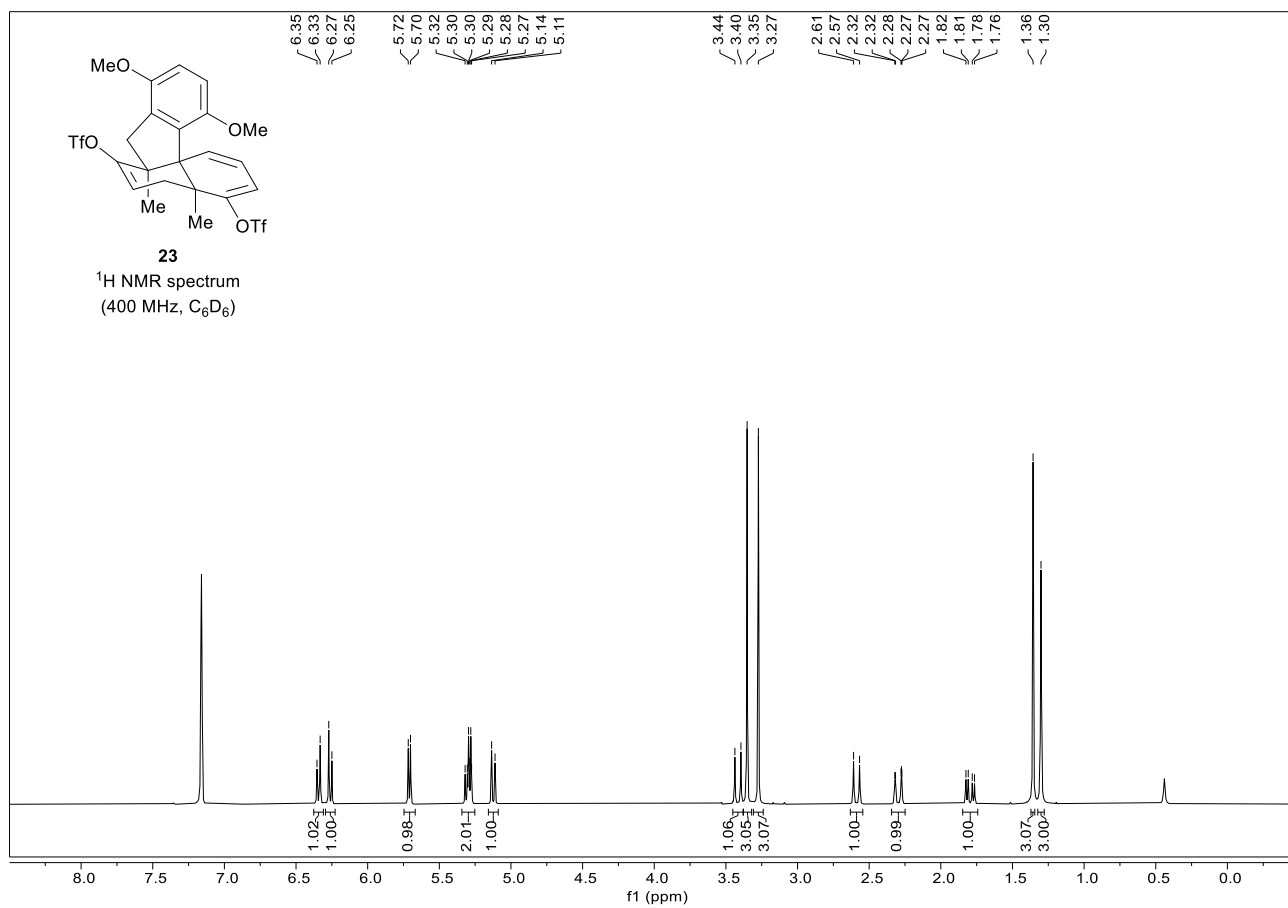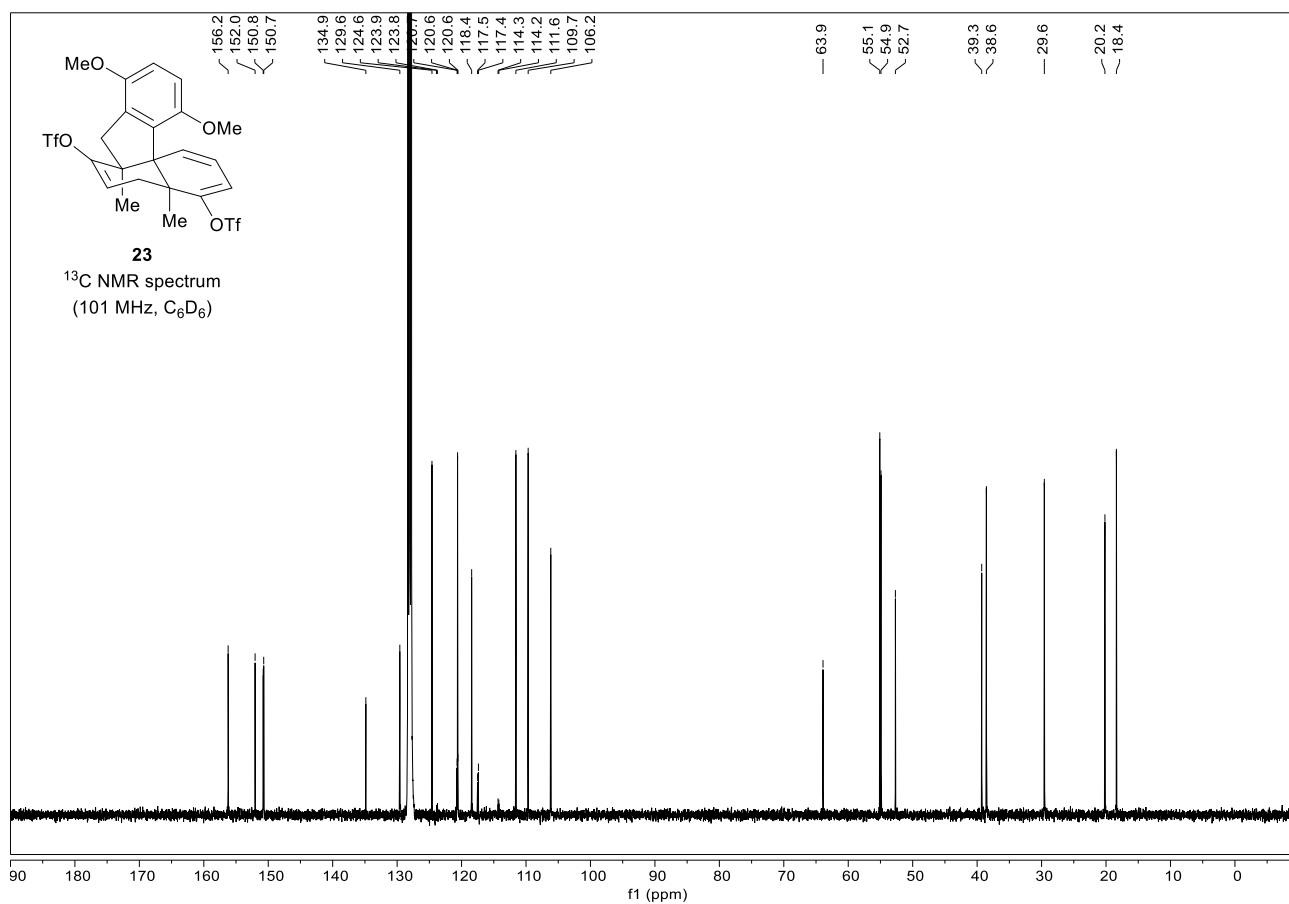

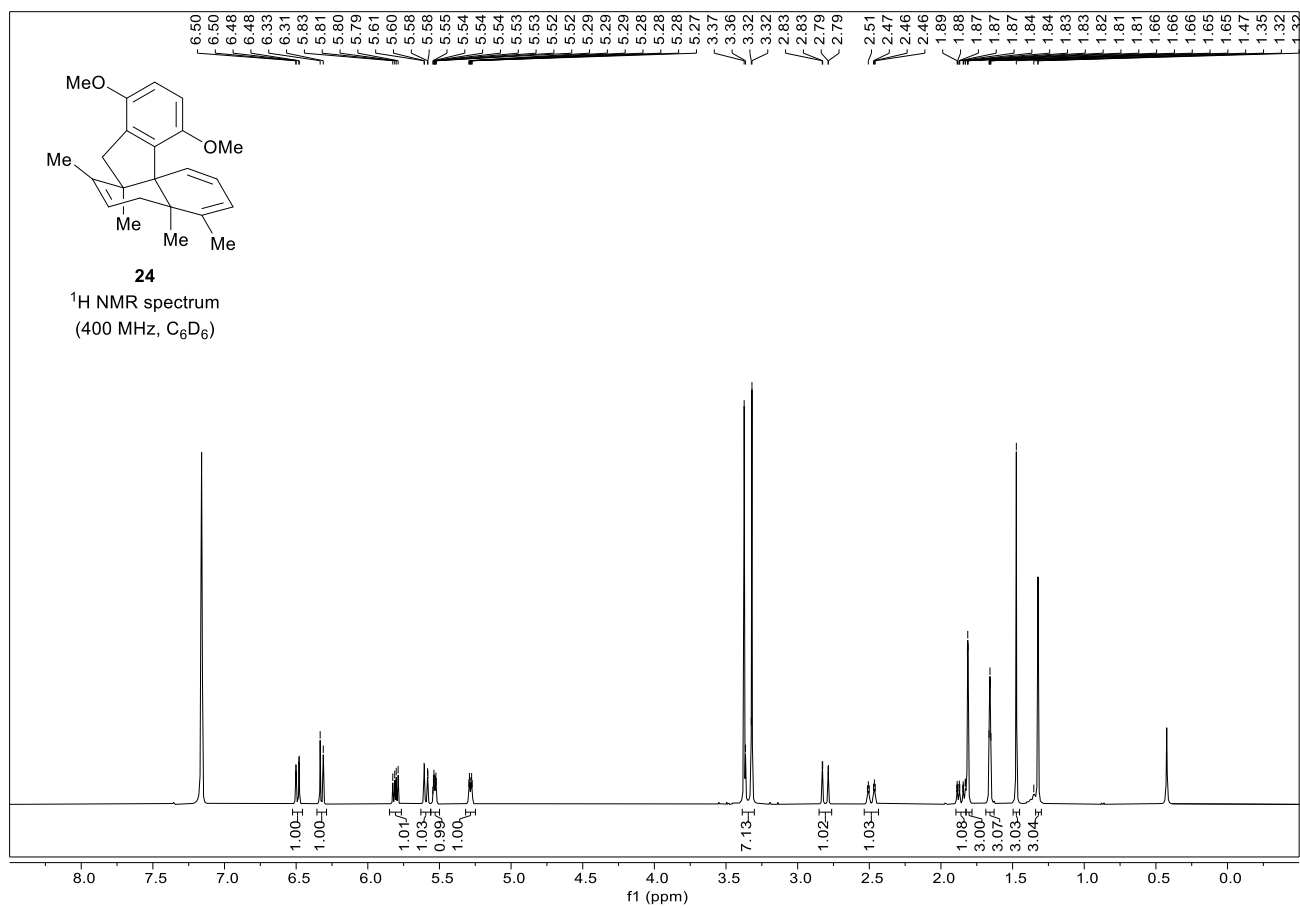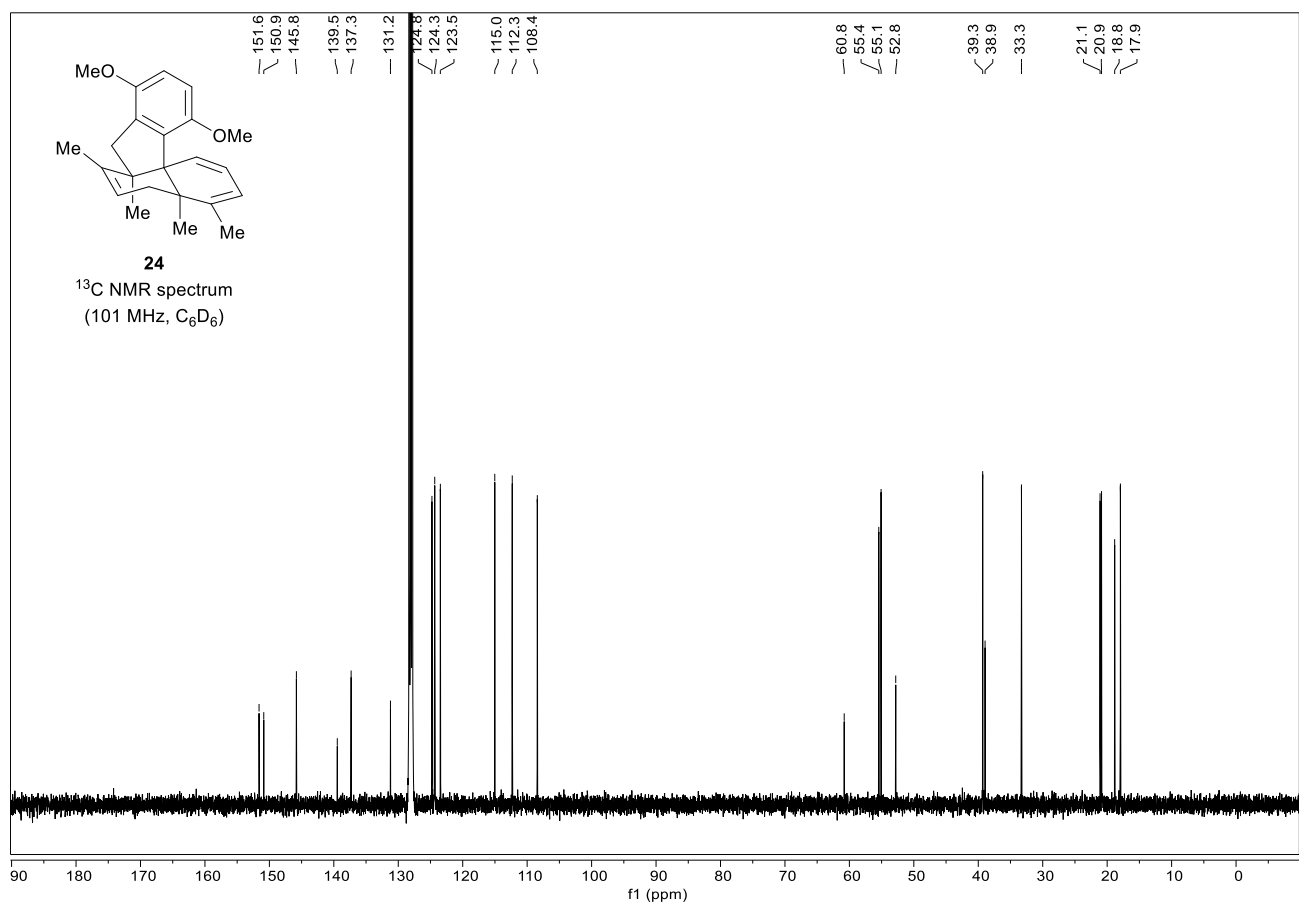

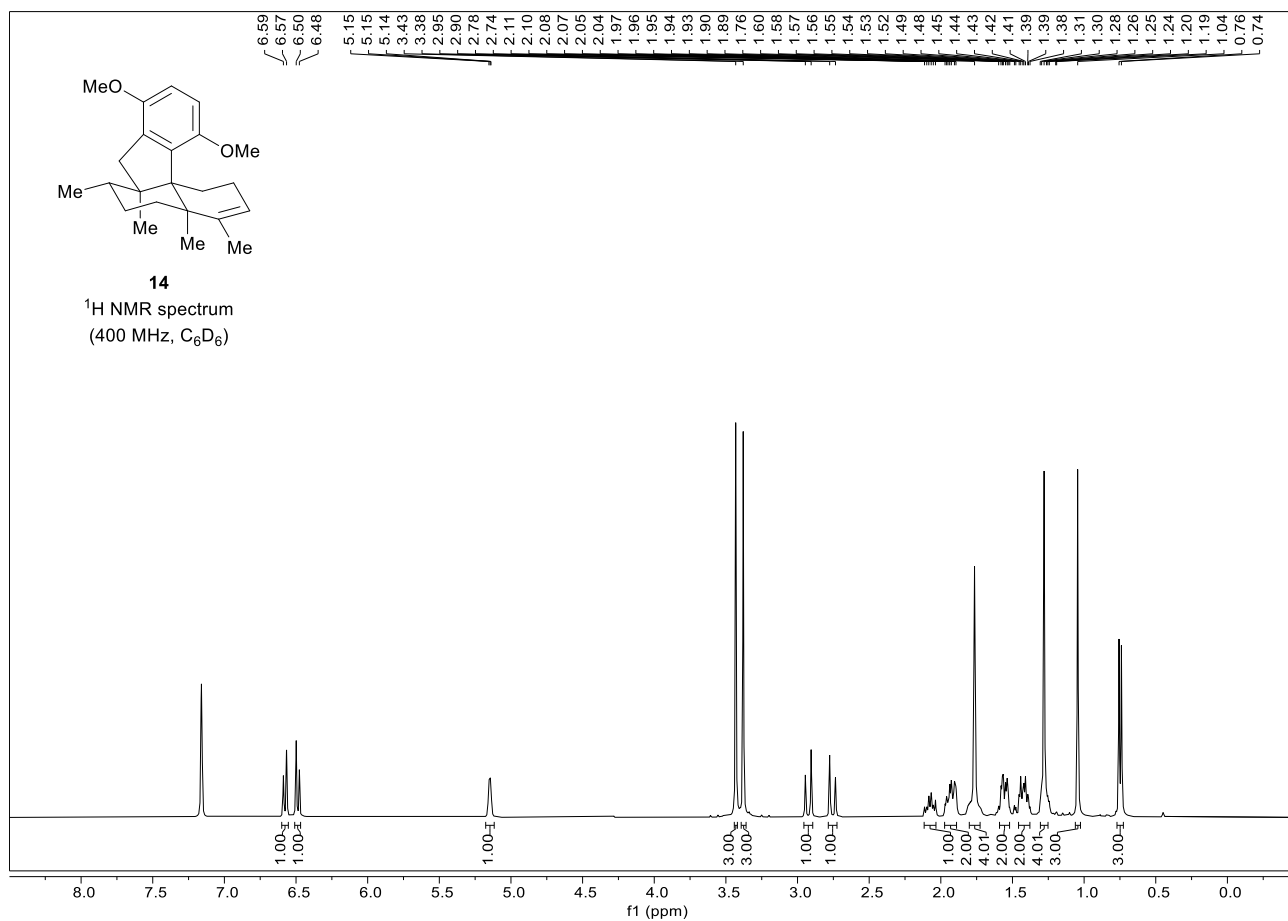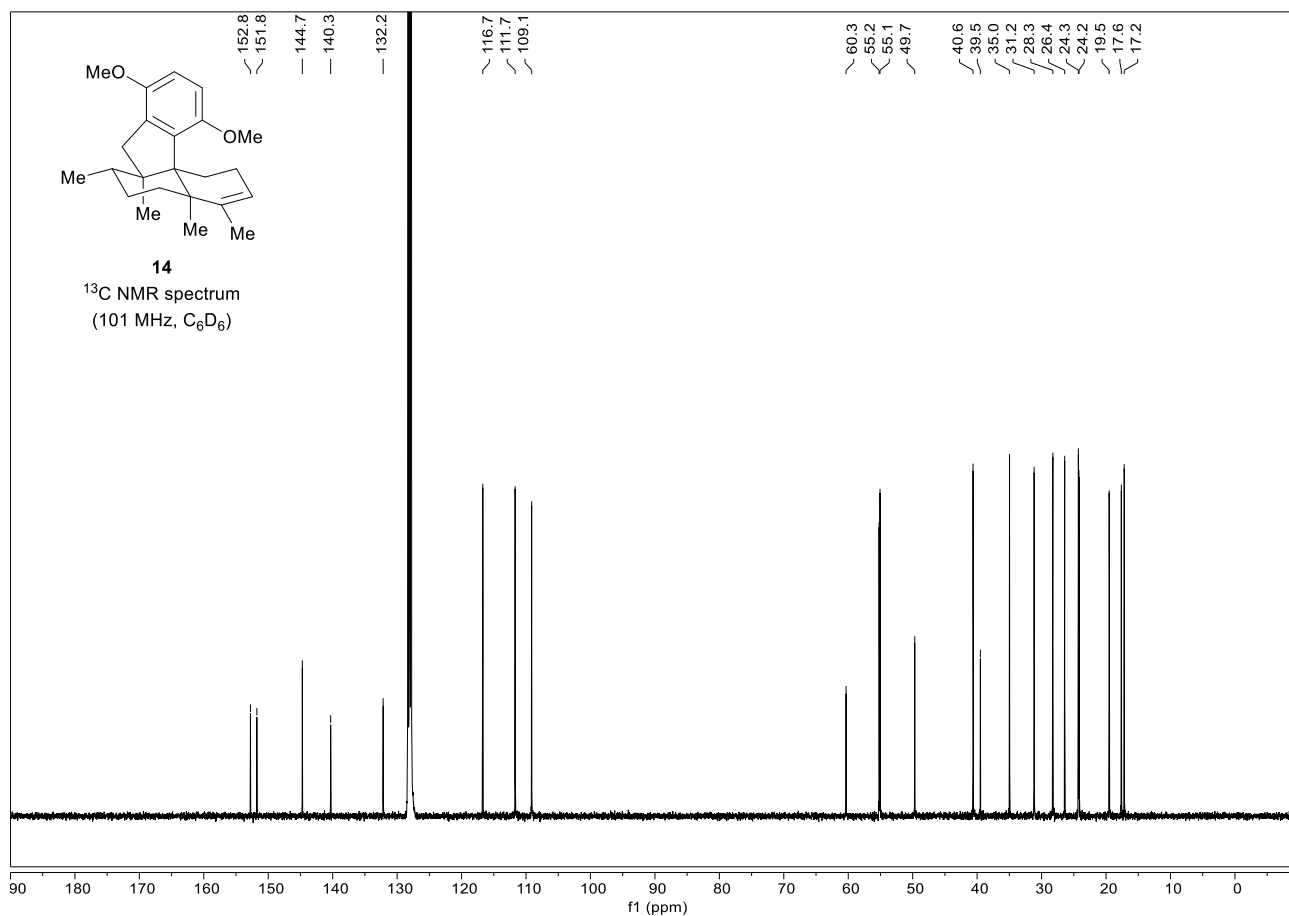





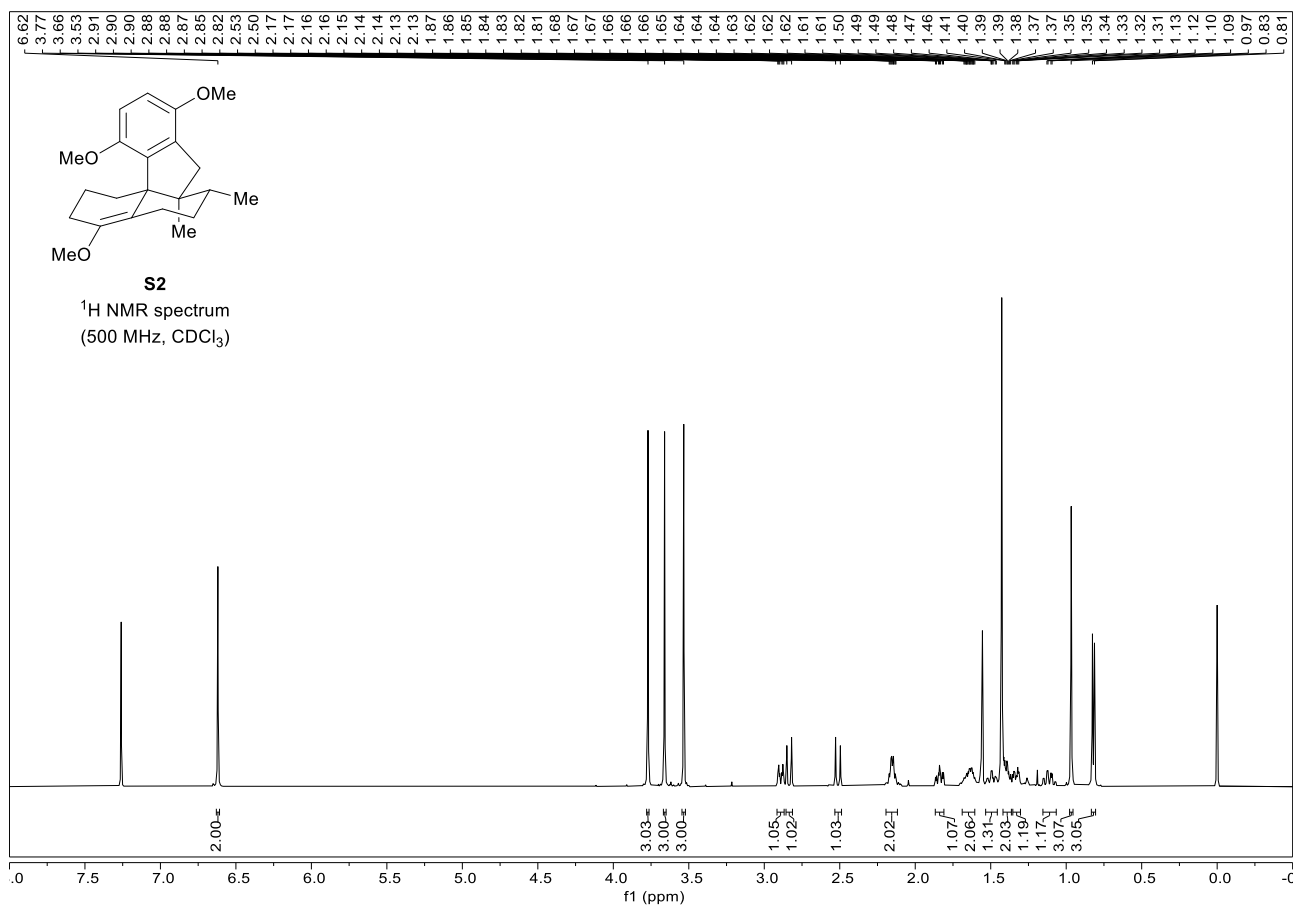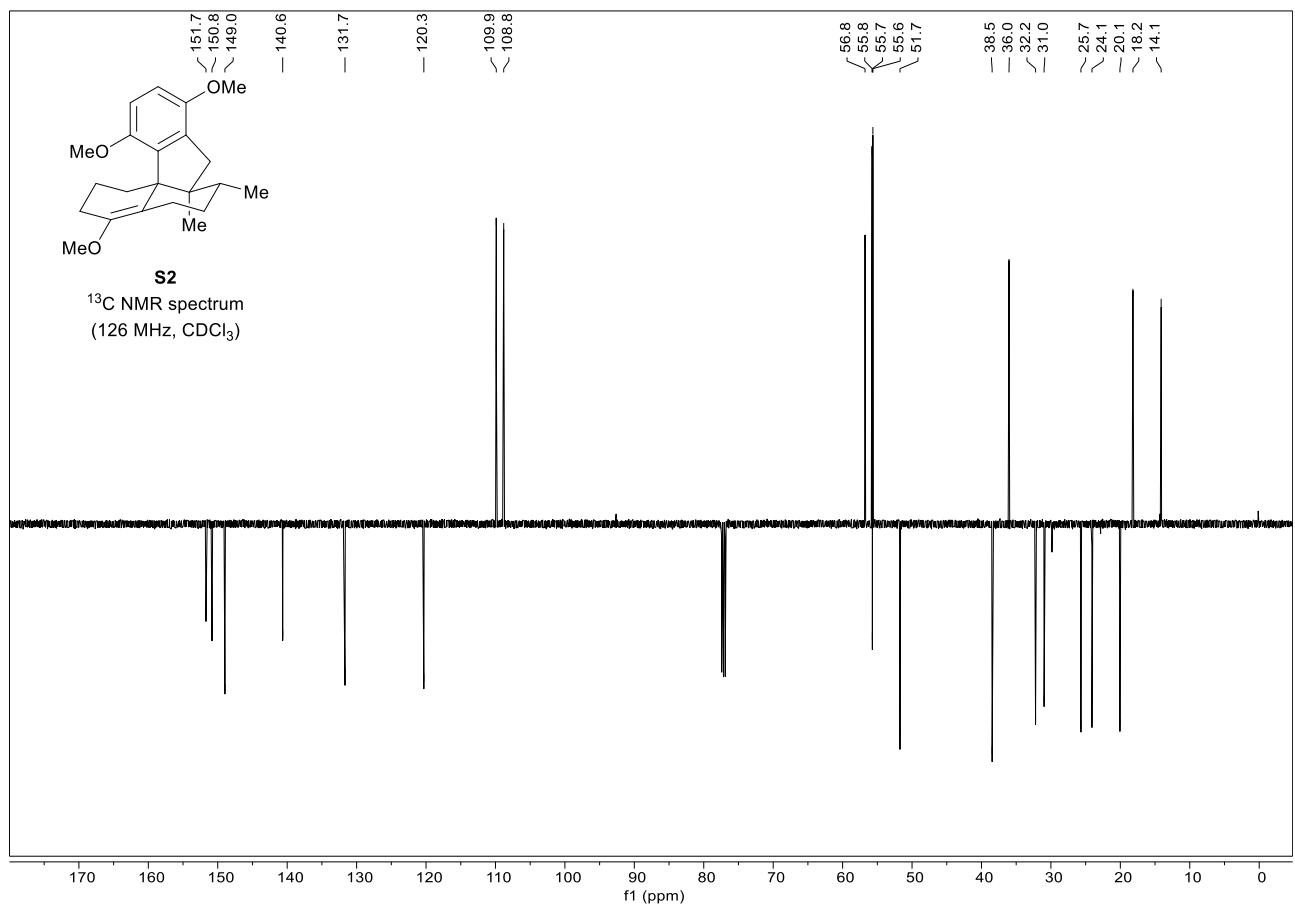

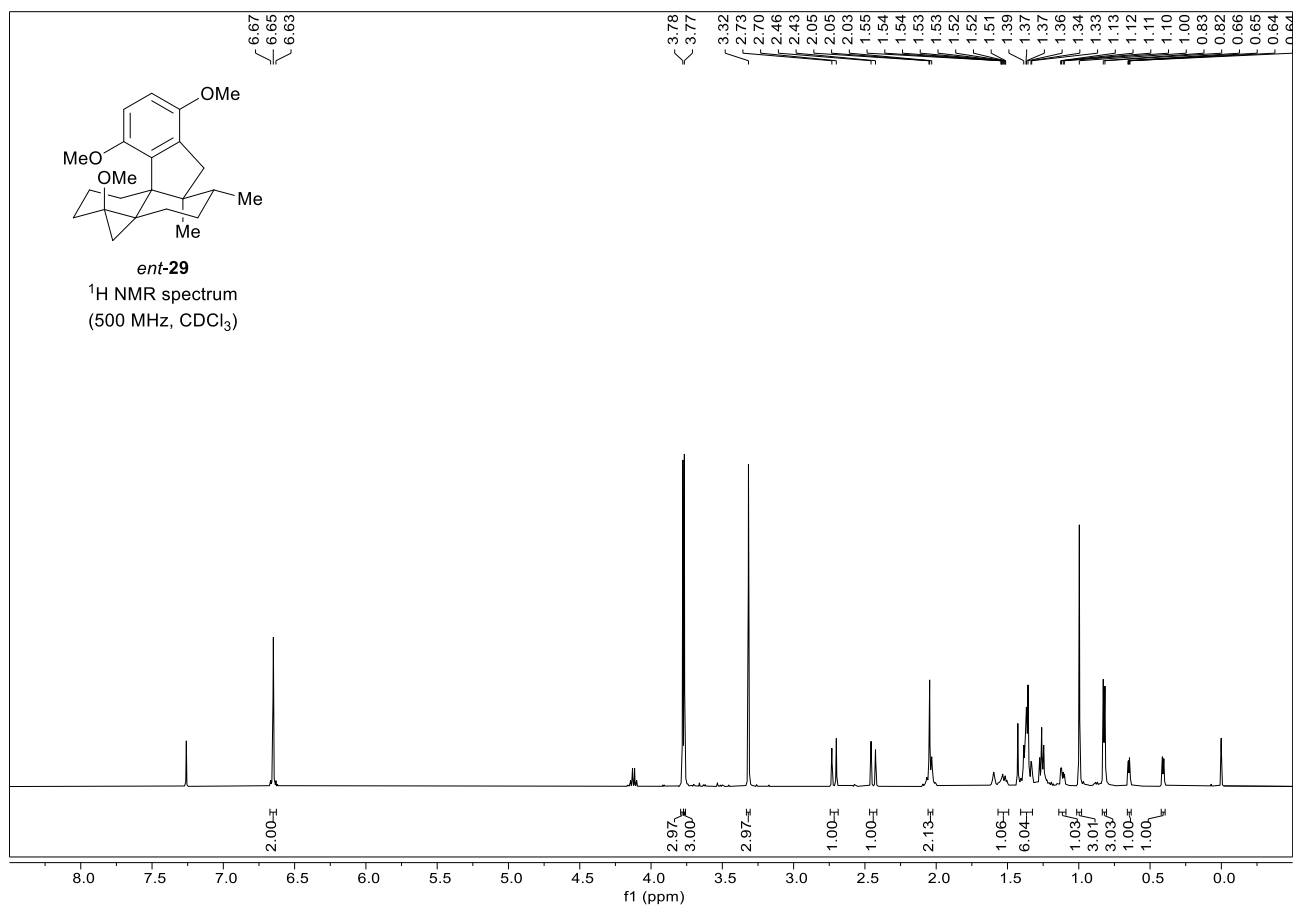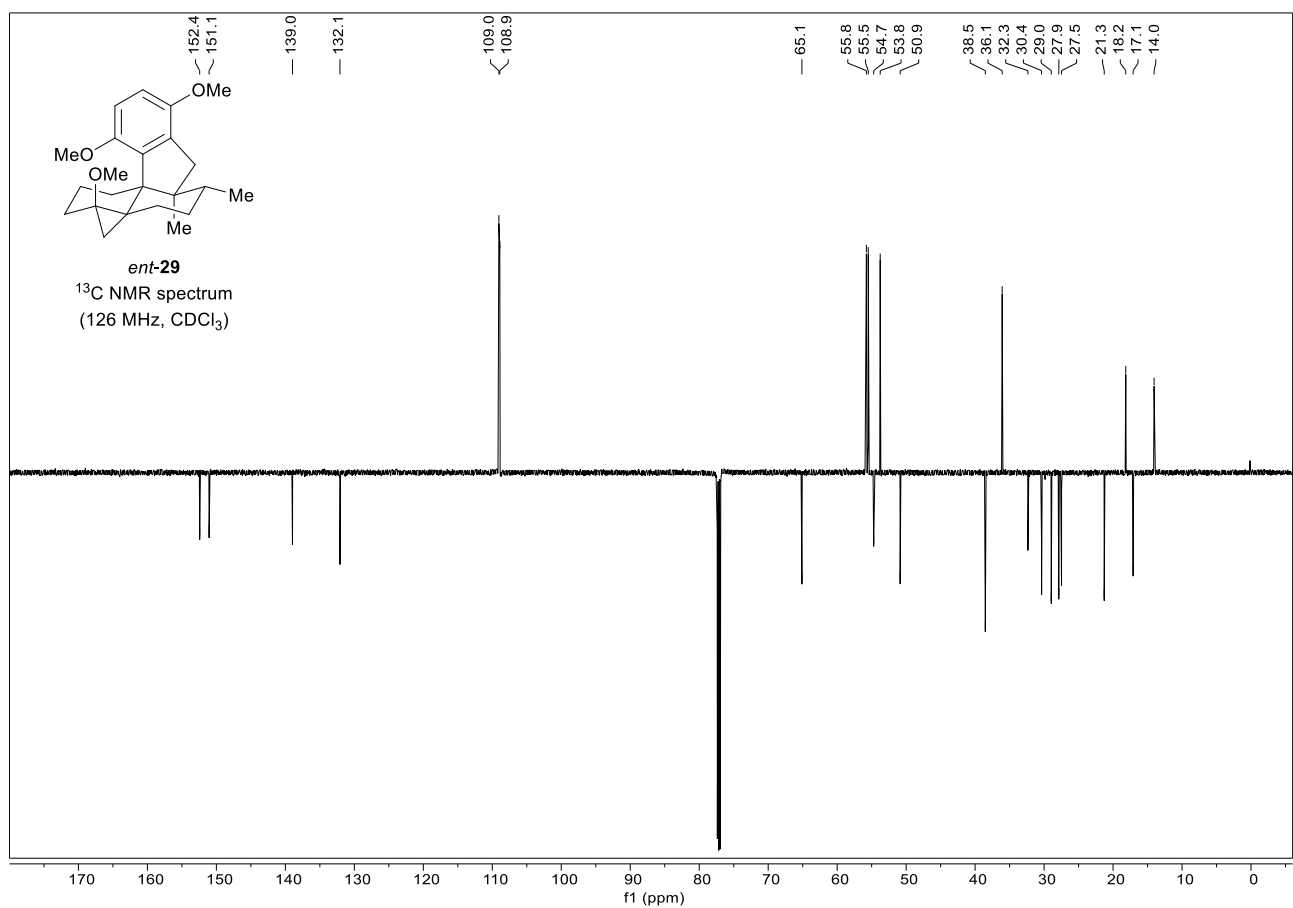

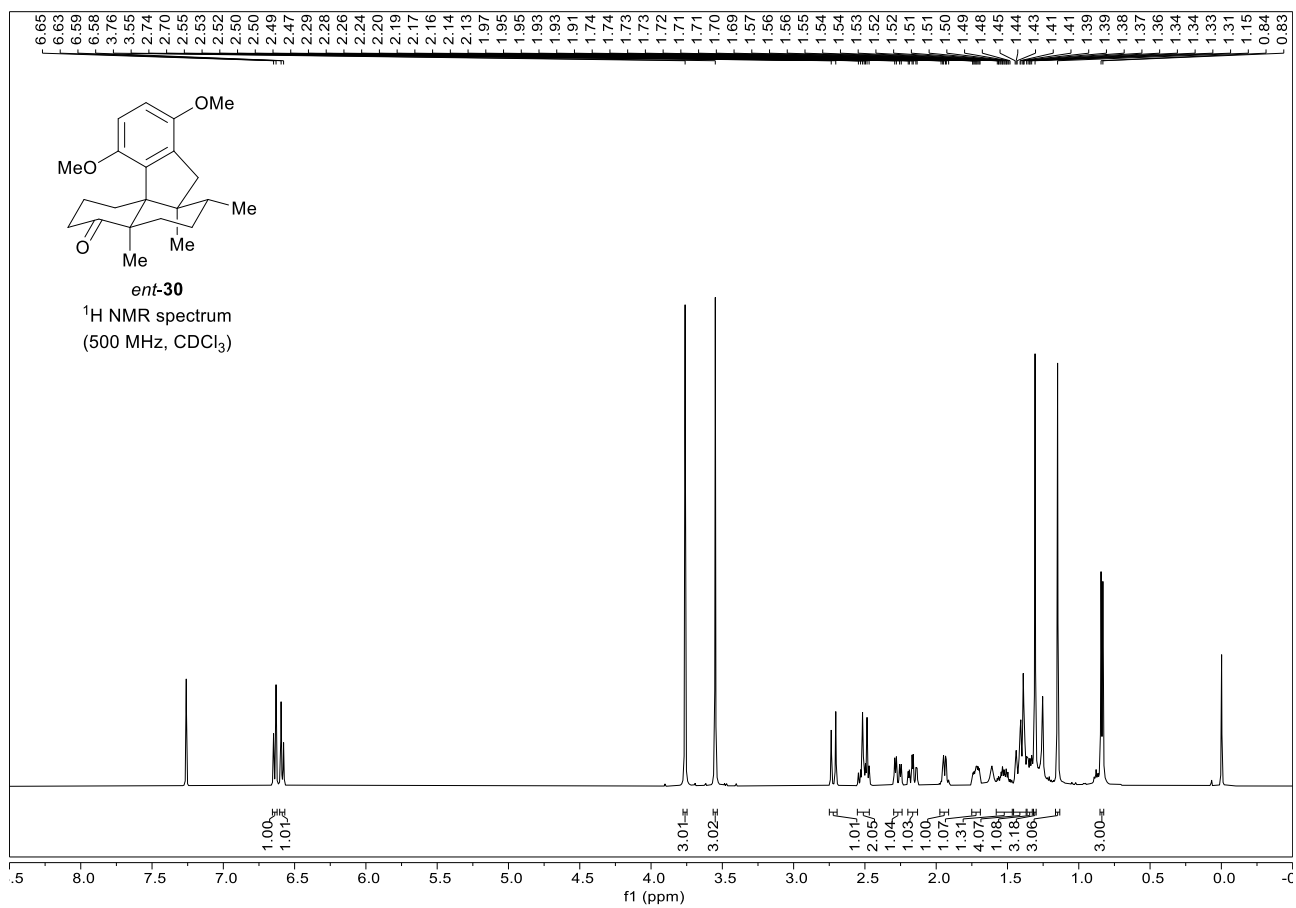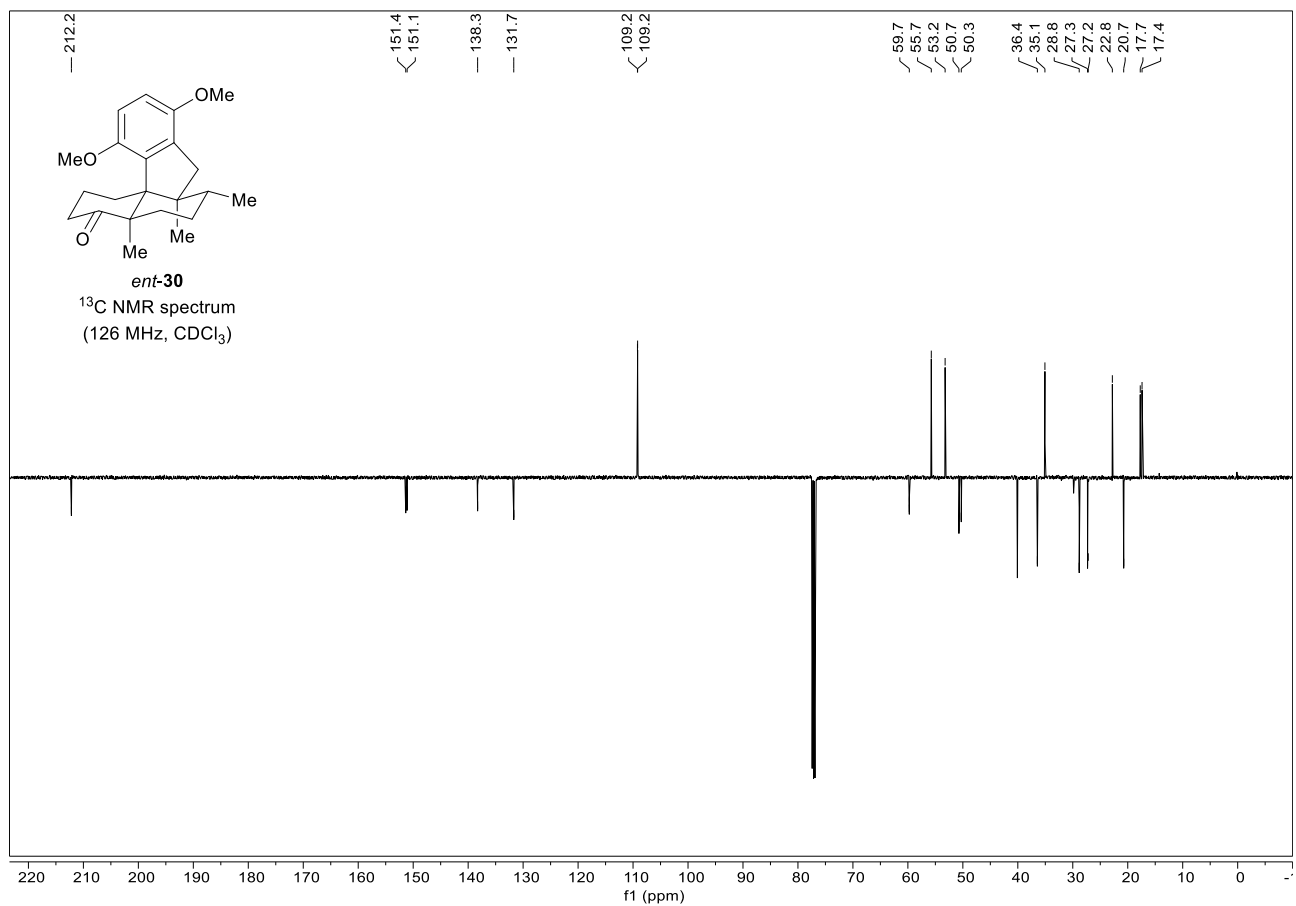



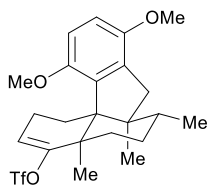

**S3**

<sup>19</sup>F NMR spectrum  
(471 MHz, CDCl<sub>3</sub>)

---75.10

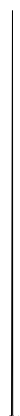

-40 -45 -50 -55 -60 -65 -70 -75 -80 -85 -90 -95 -100 -105 -110 -115 -120 -125 -130  
f1 (ppm)

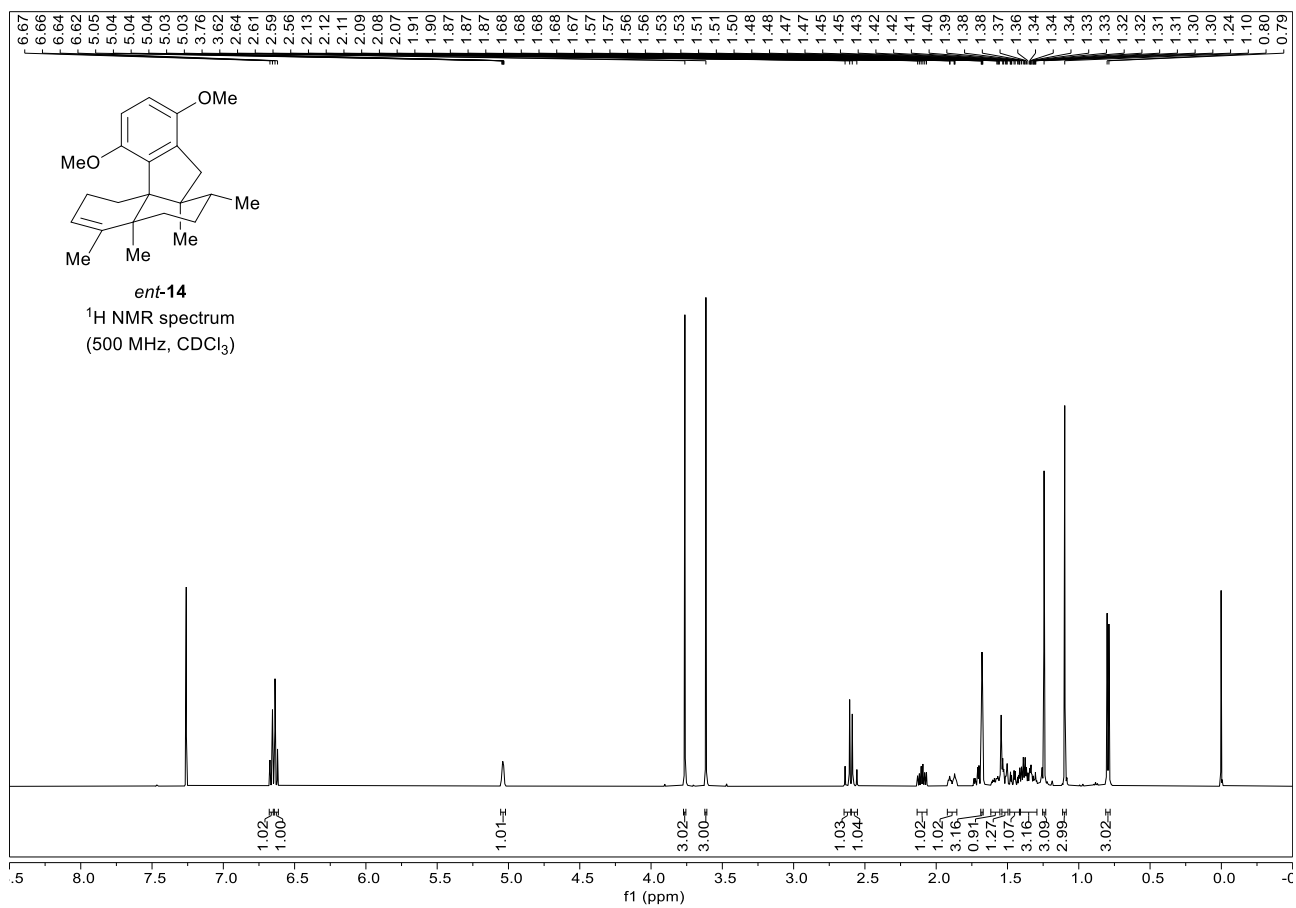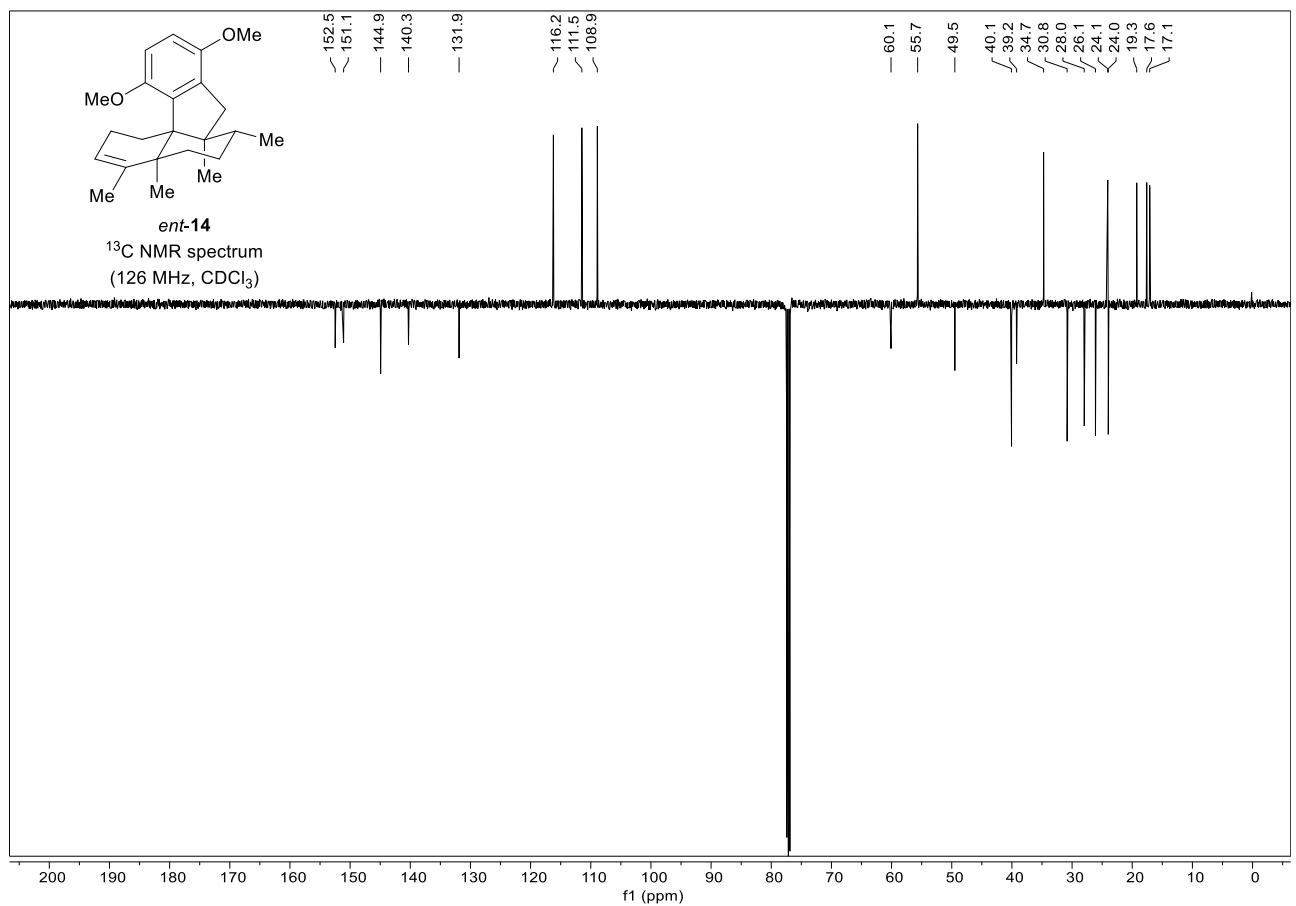

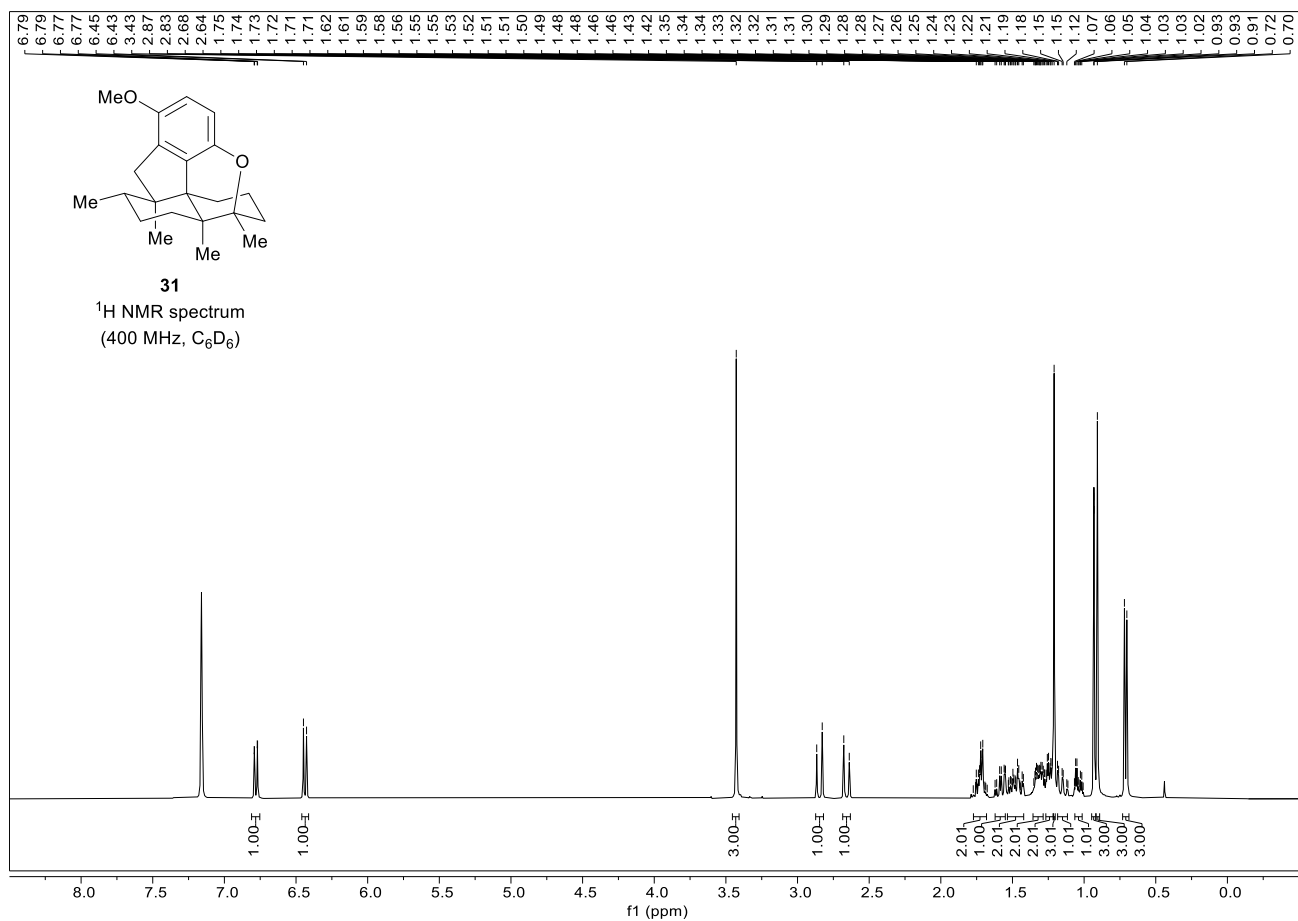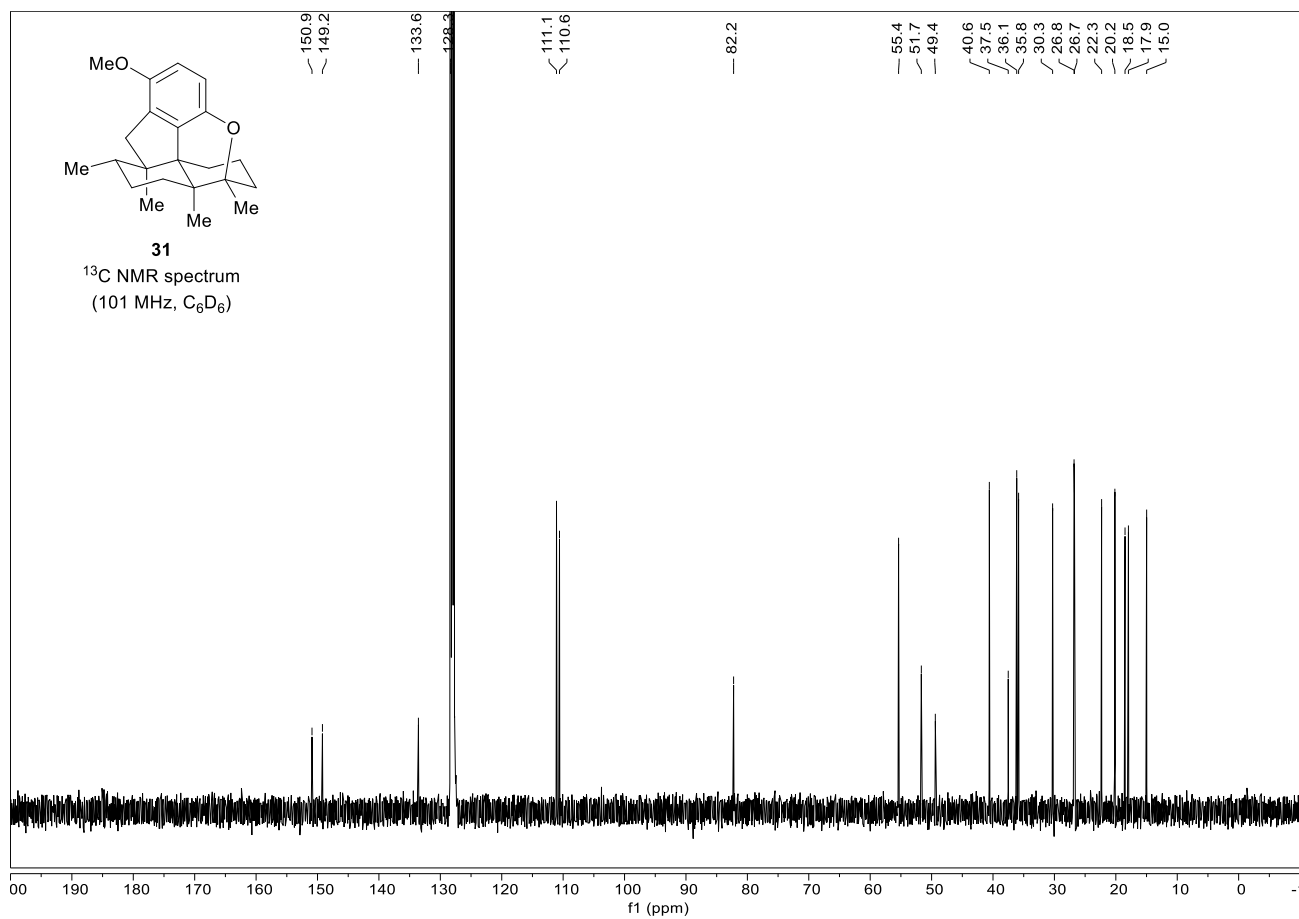

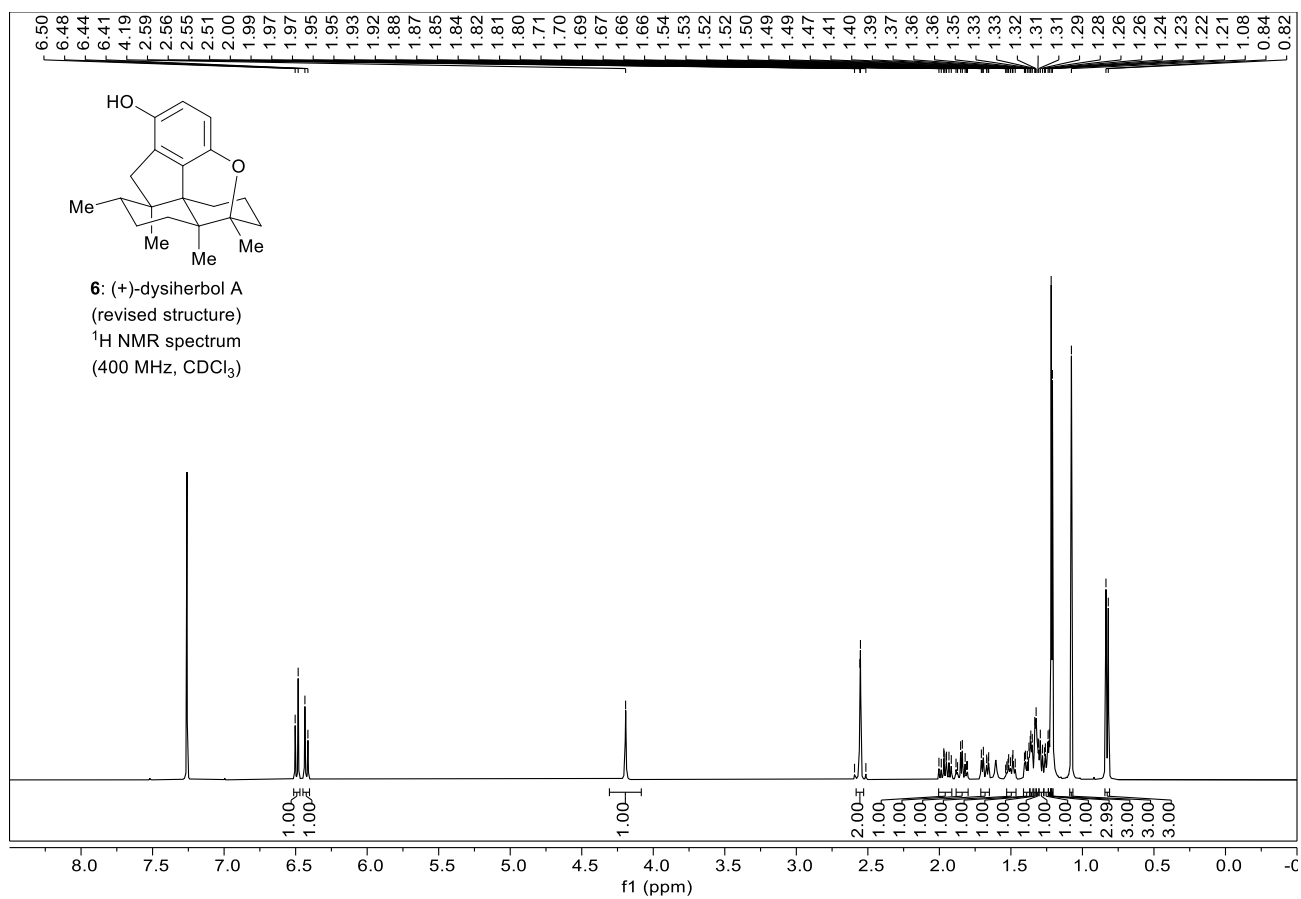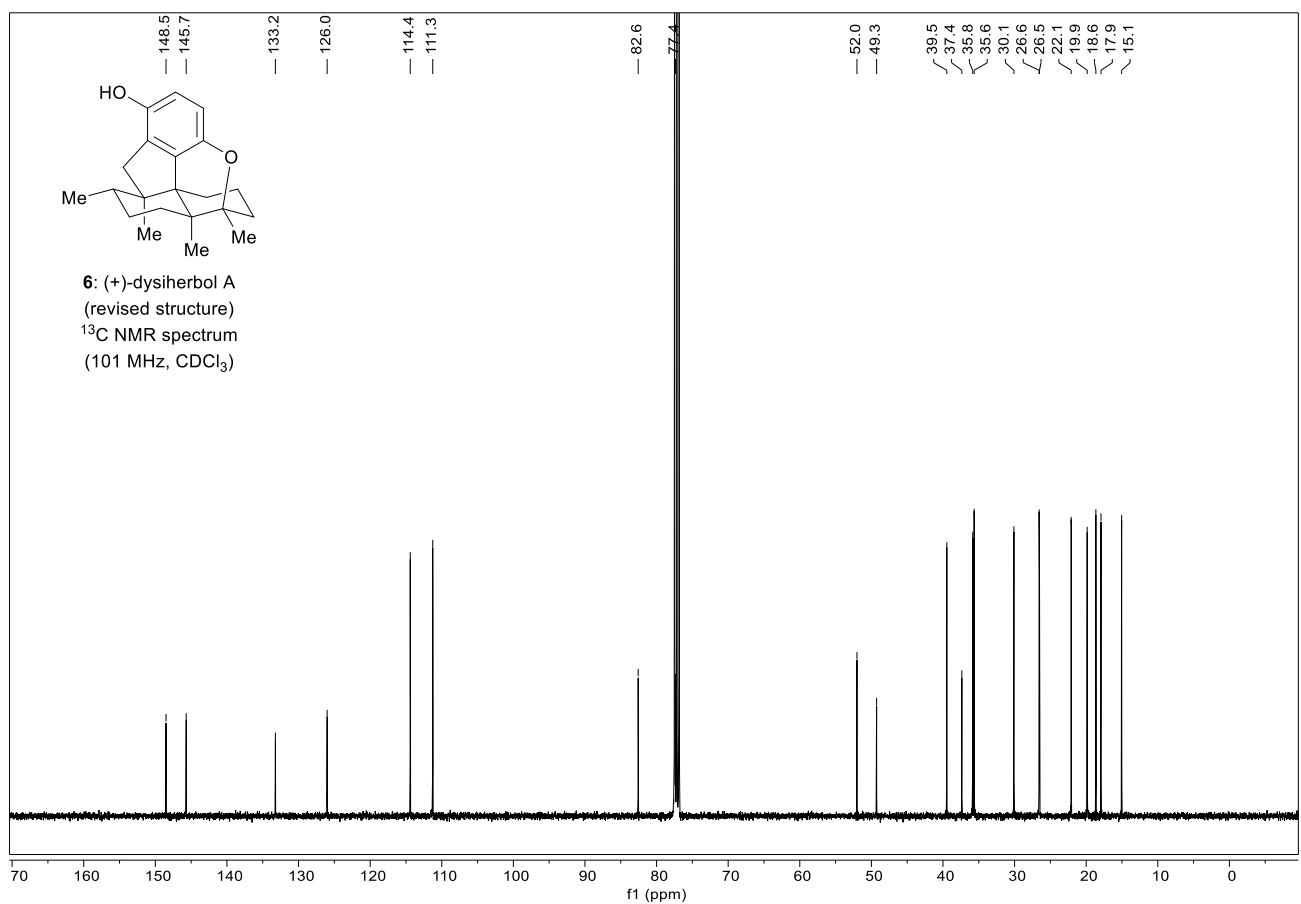



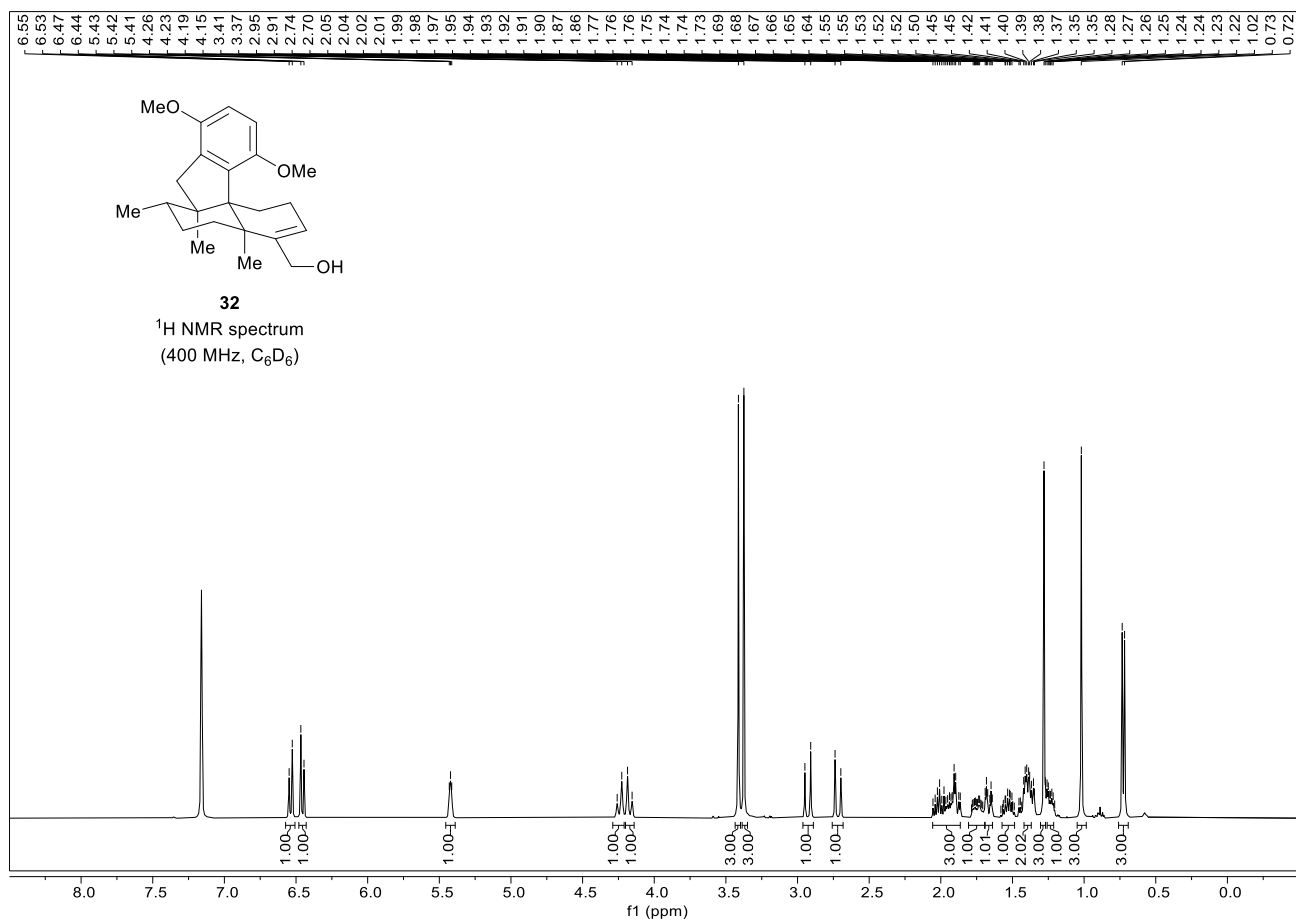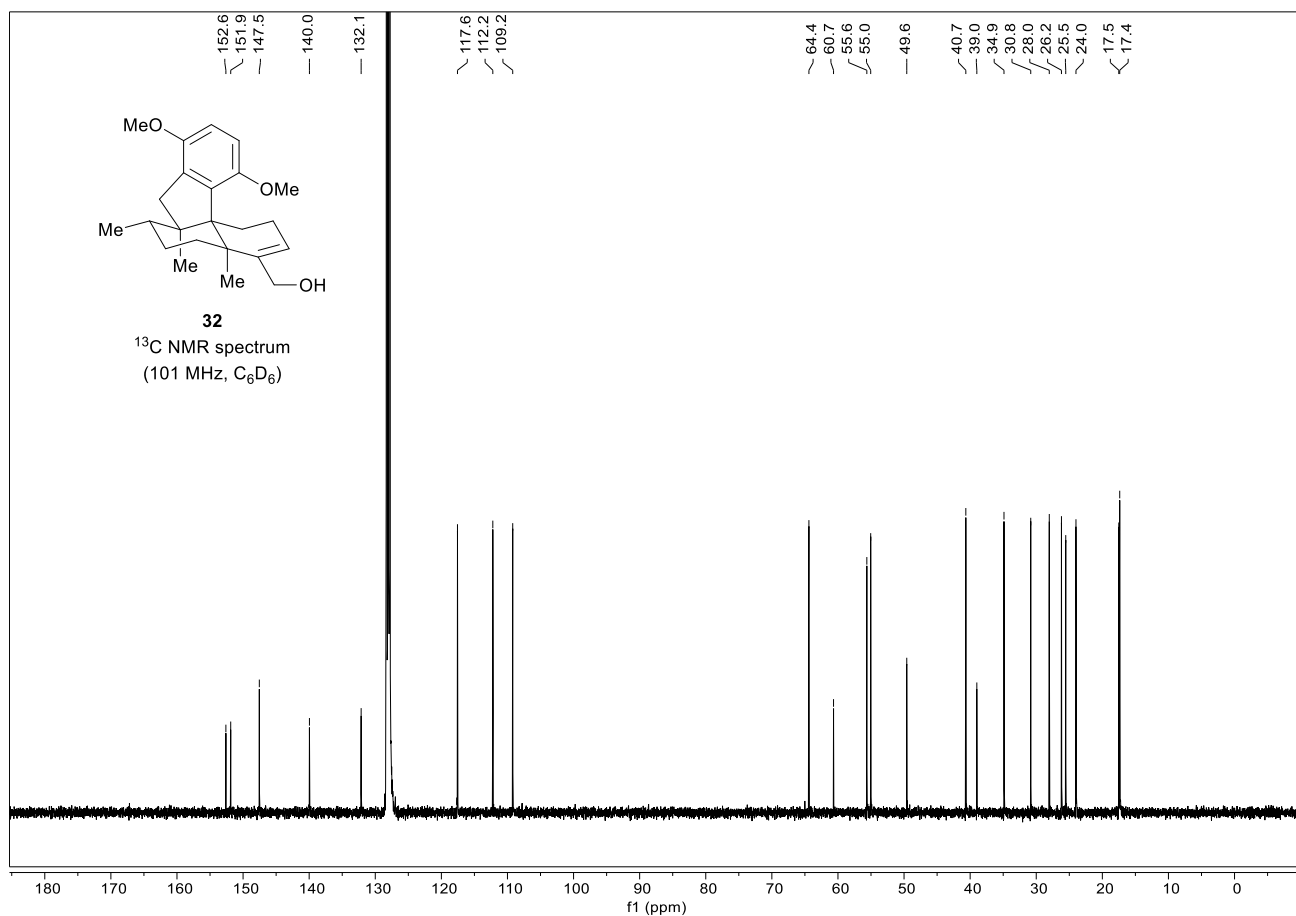

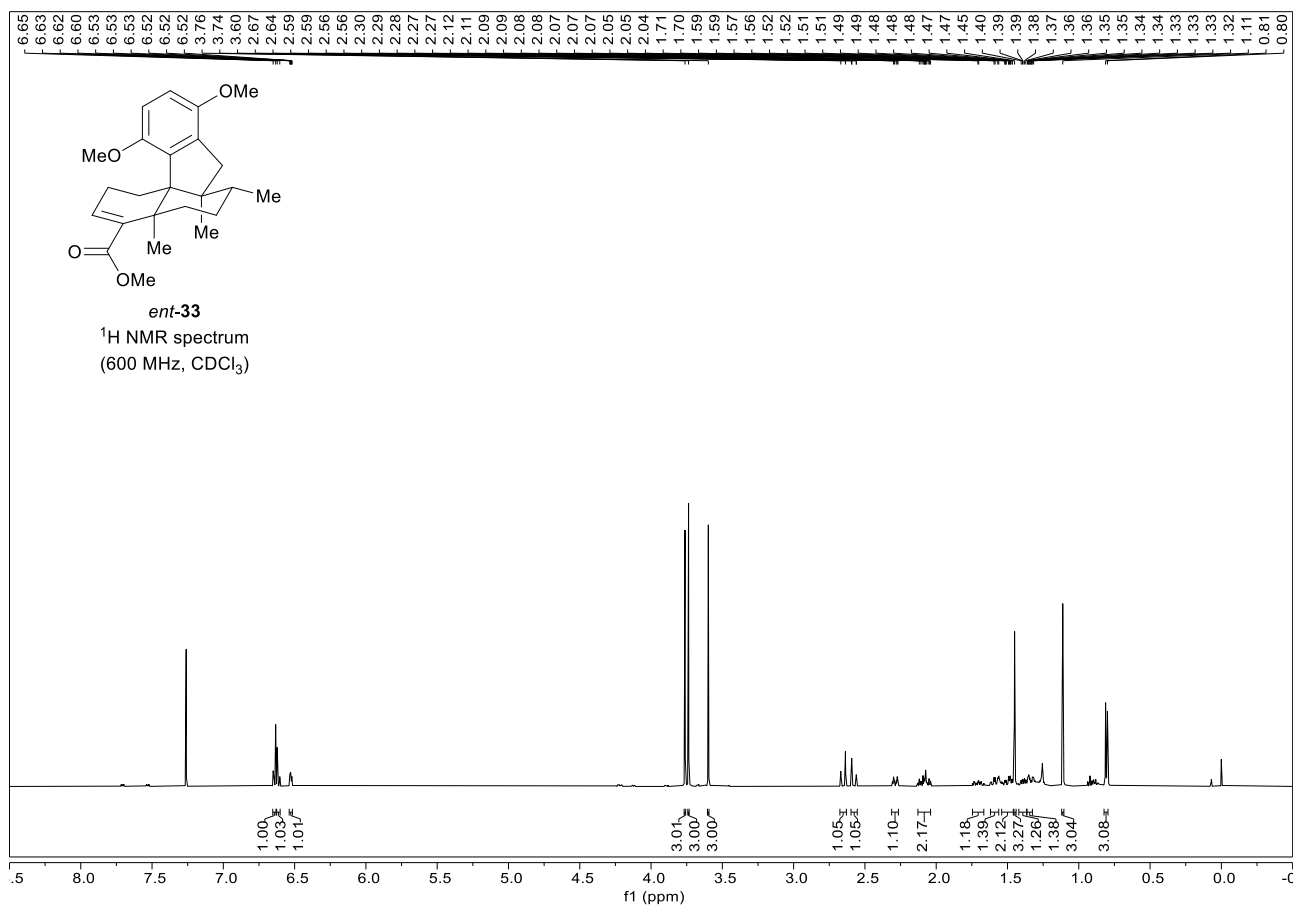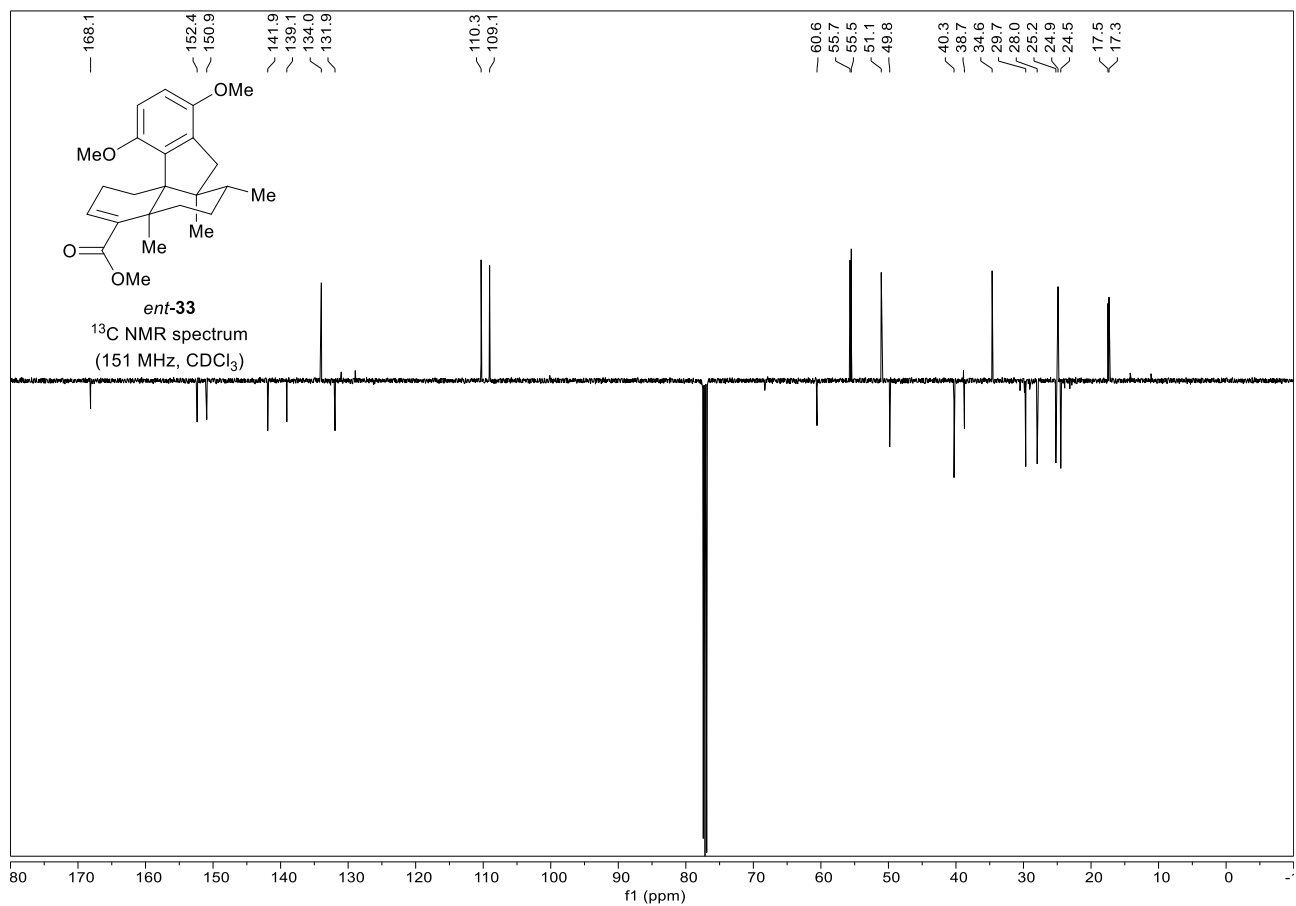

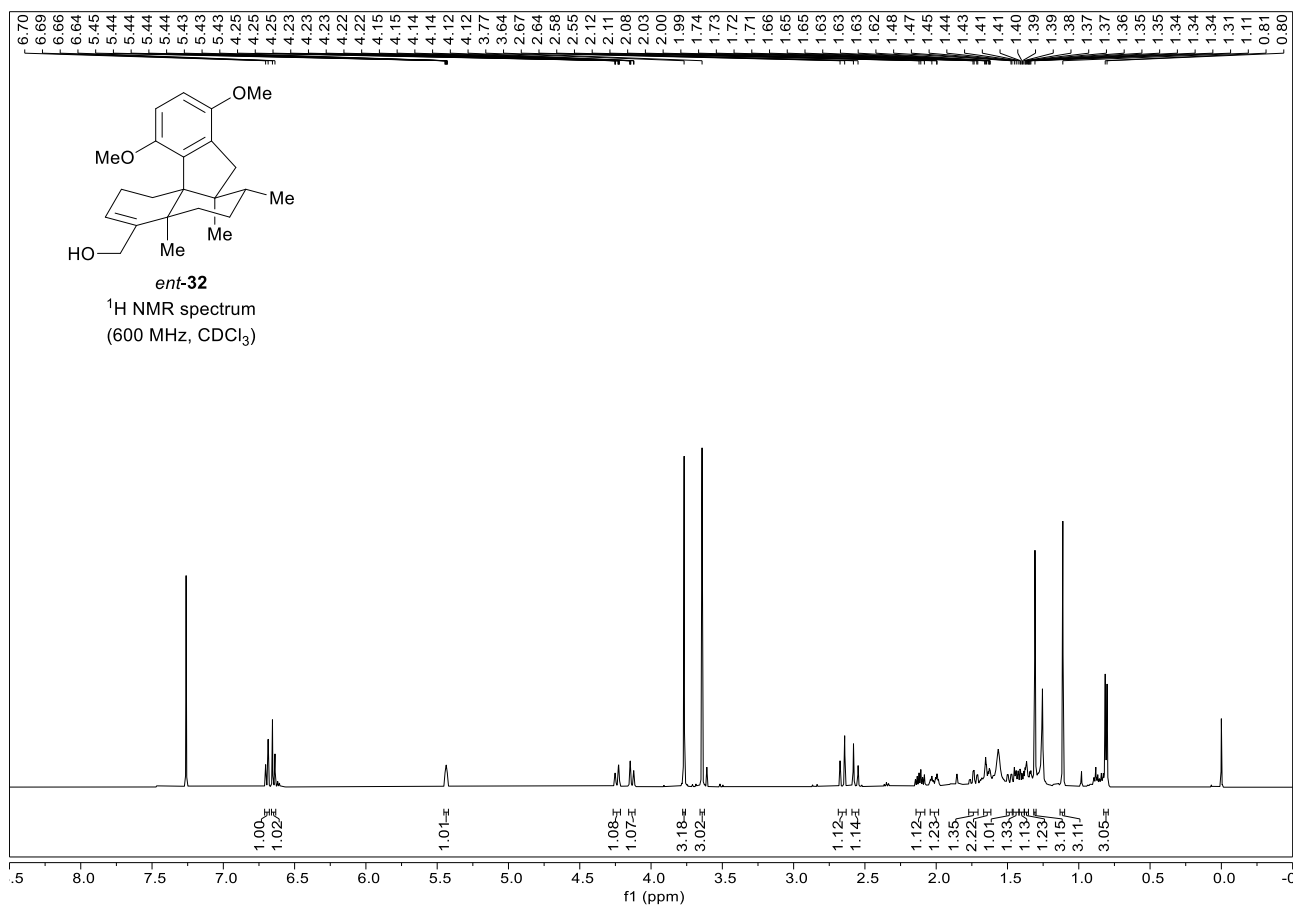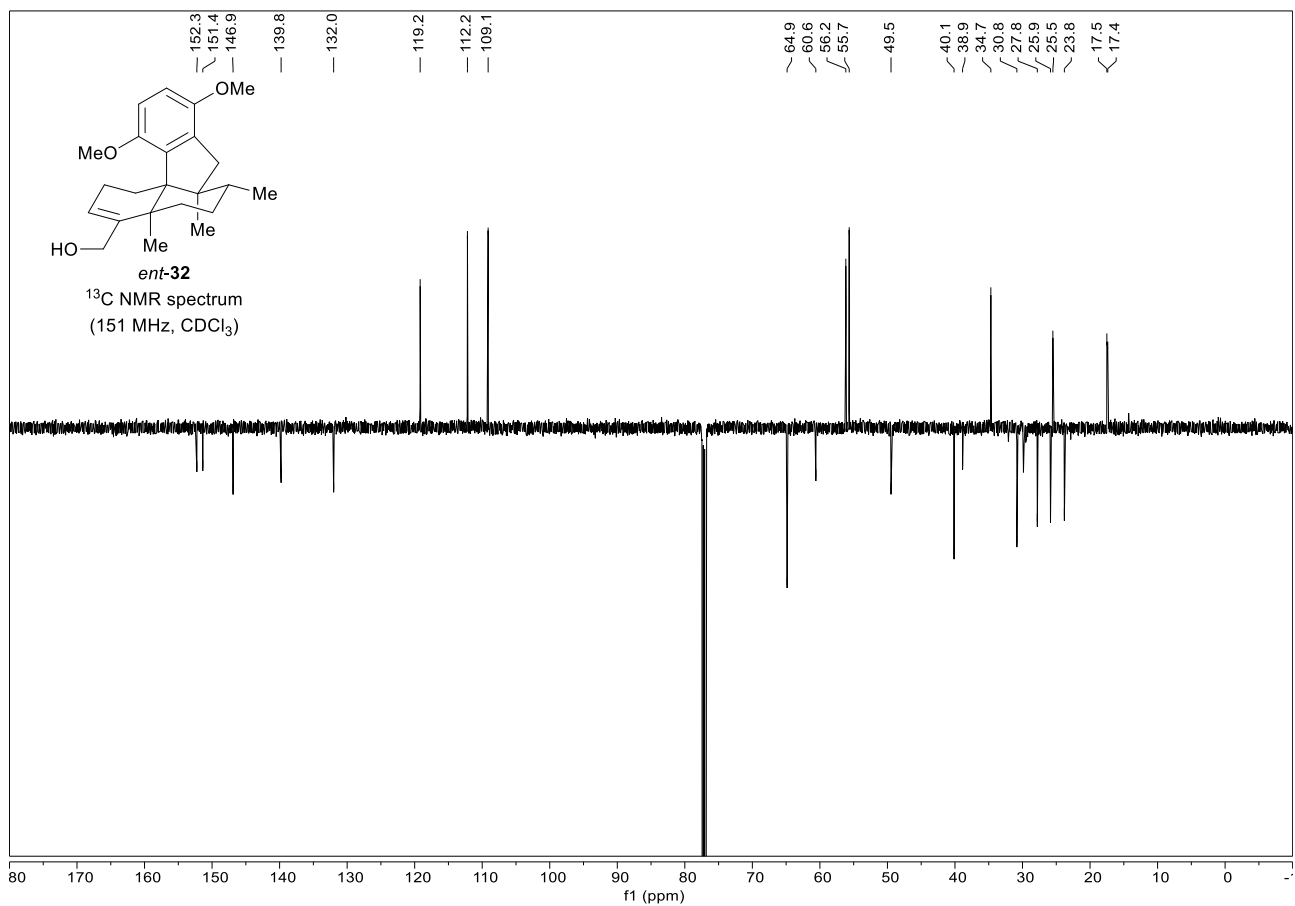

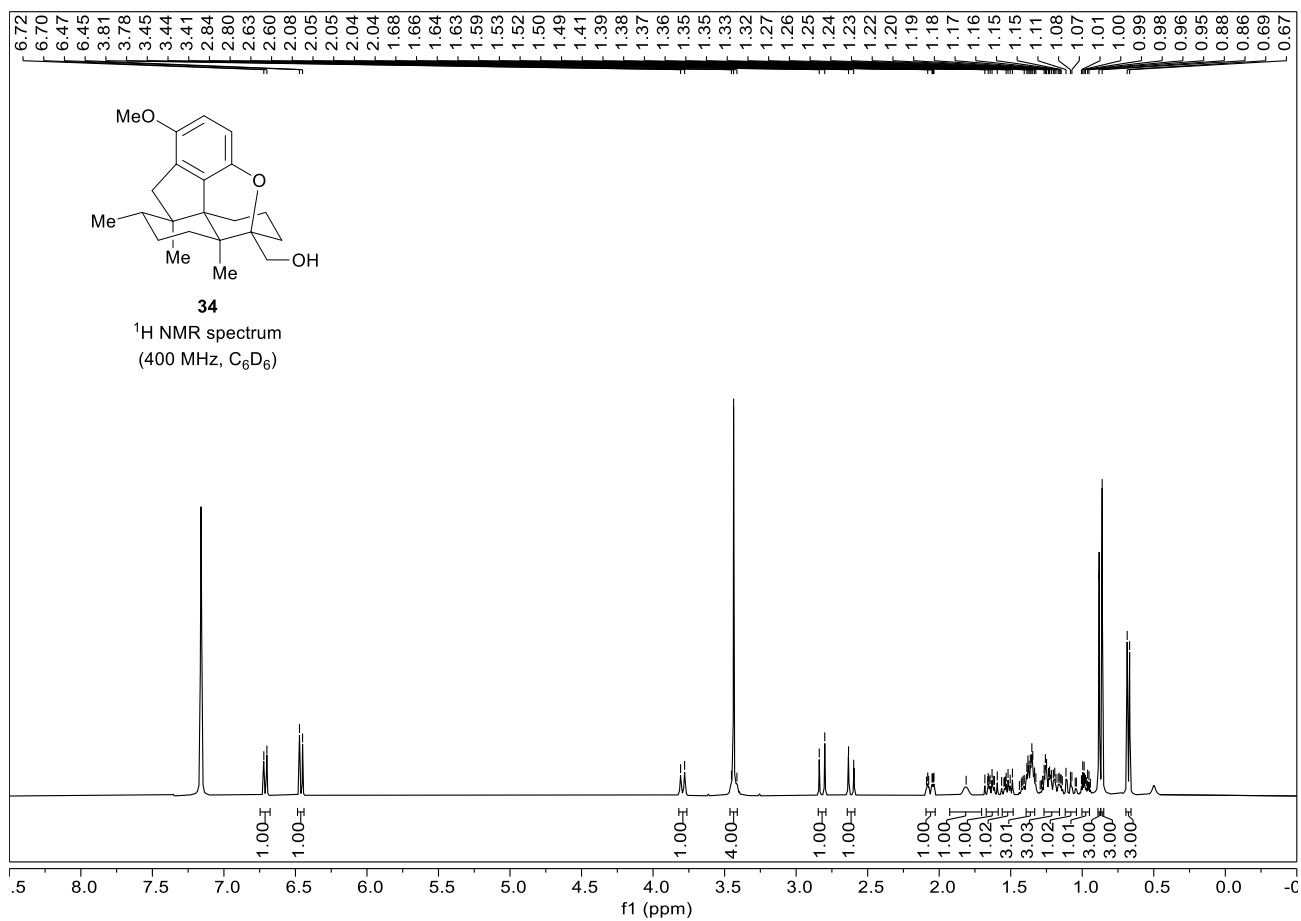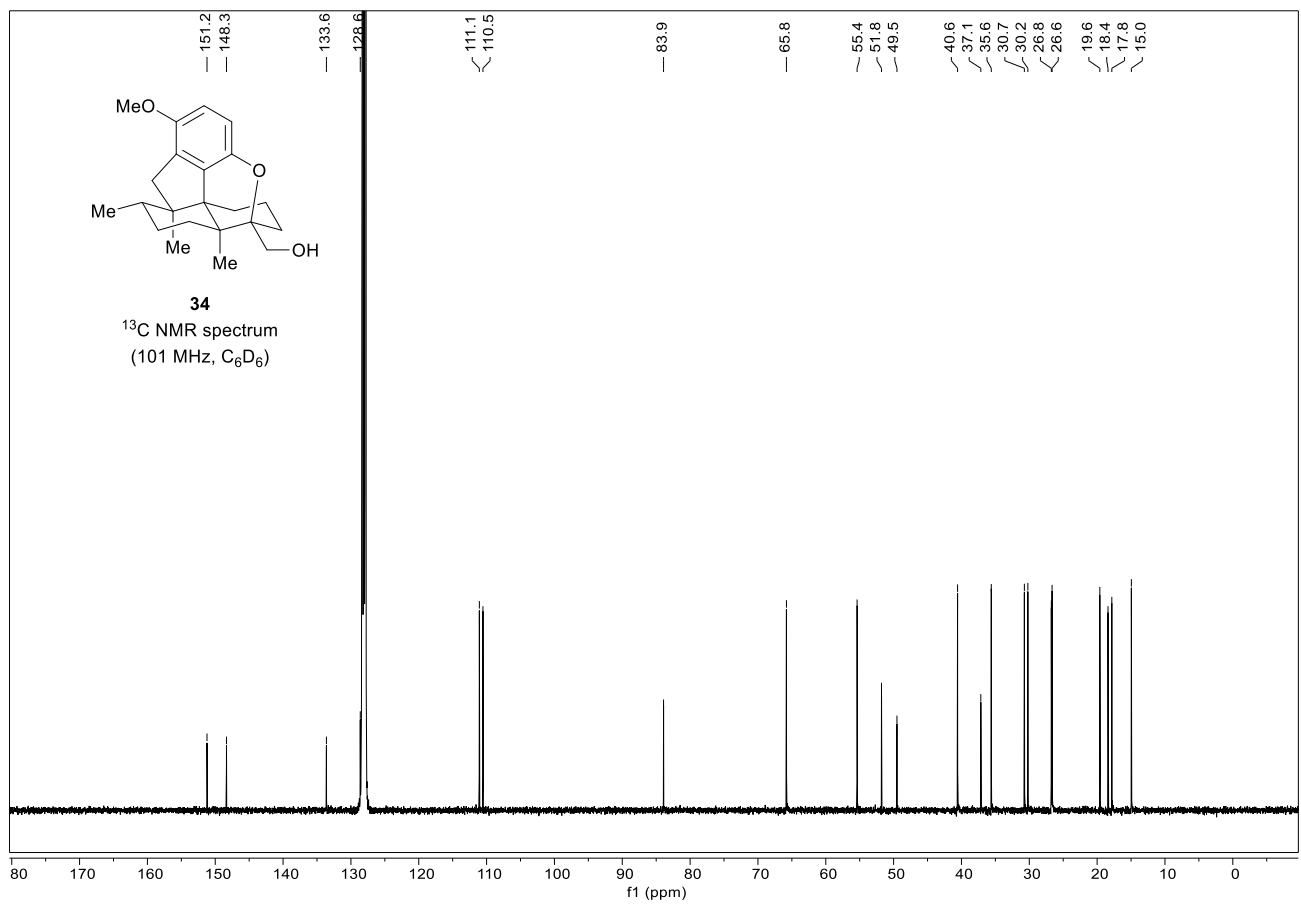

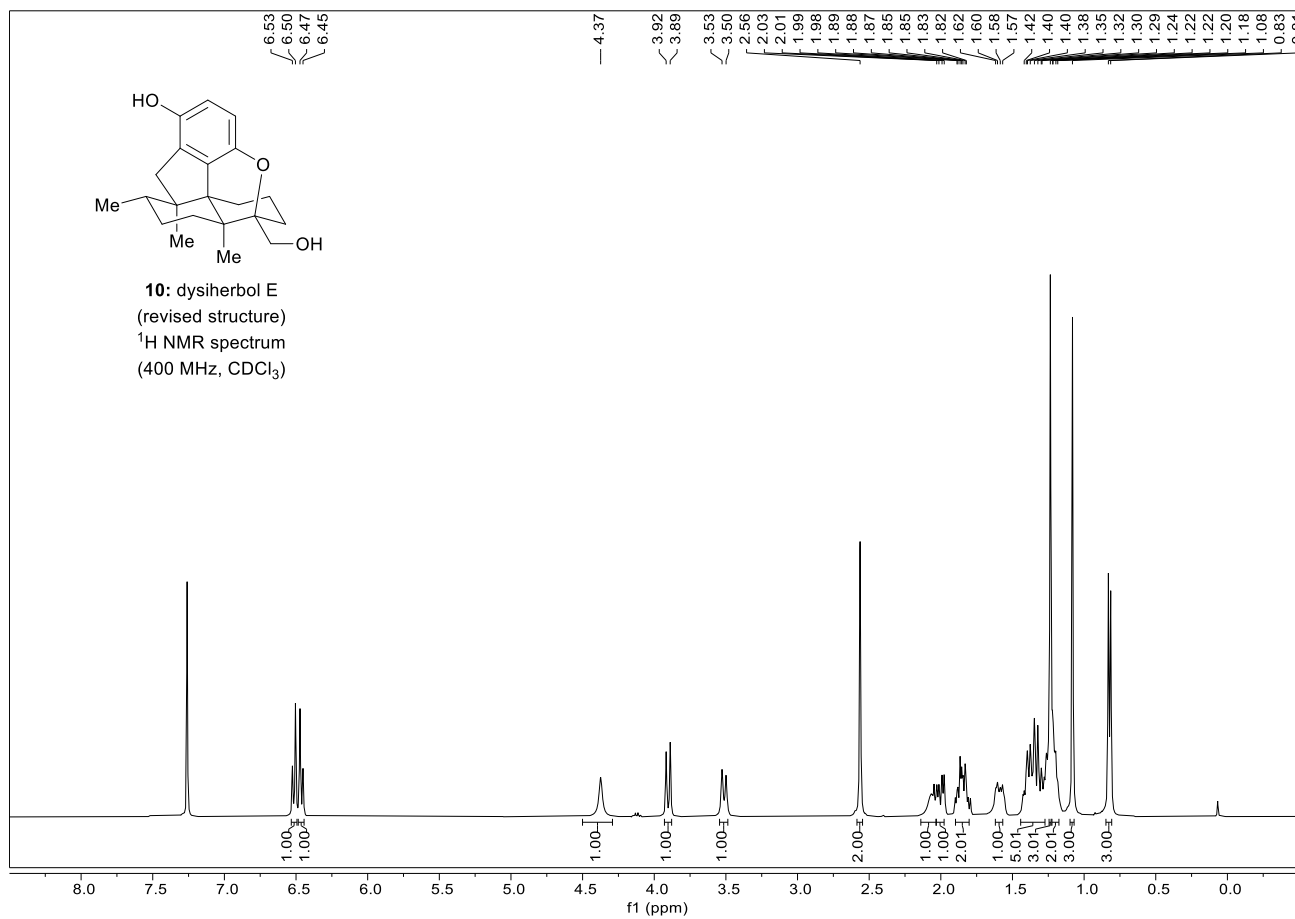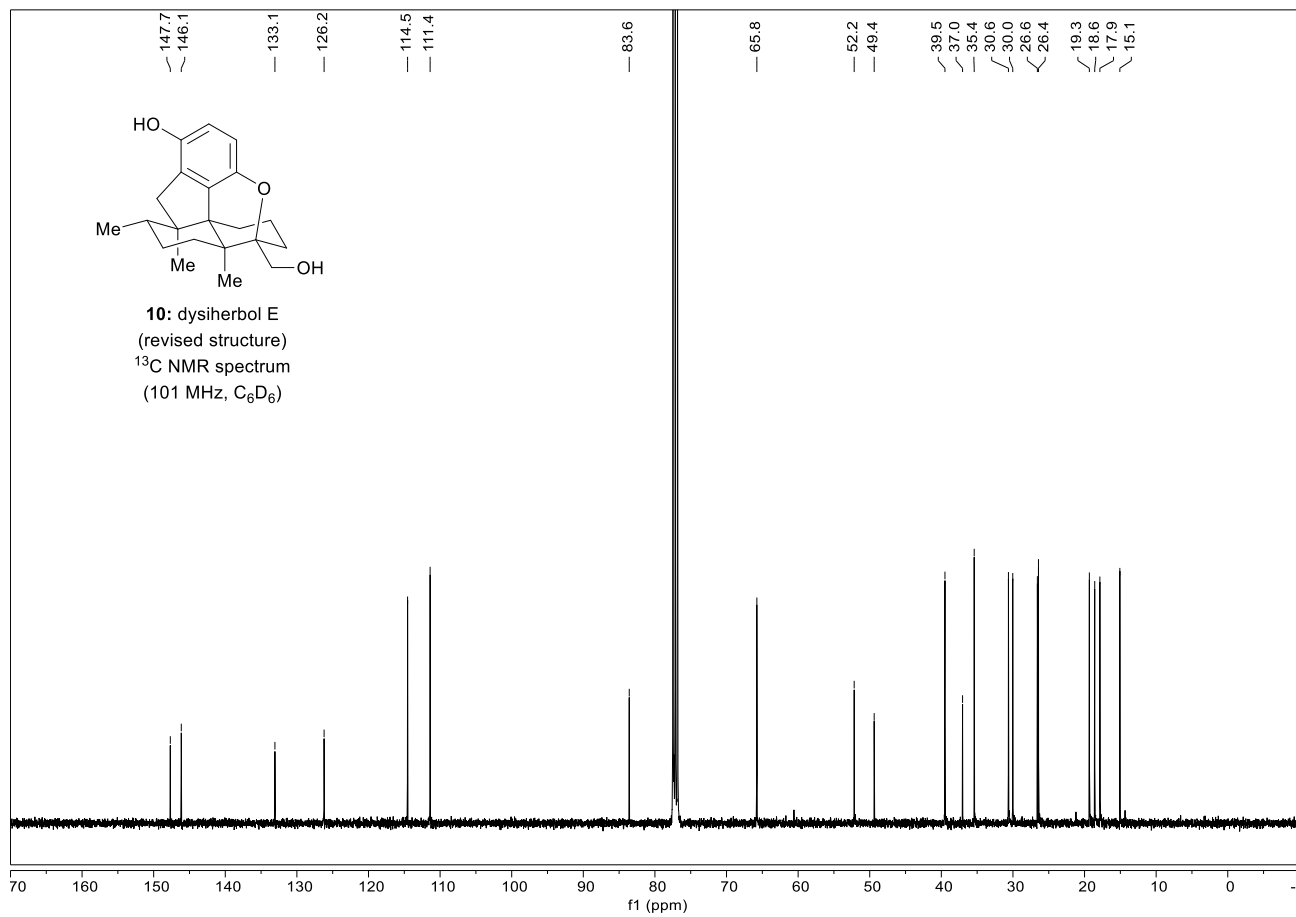

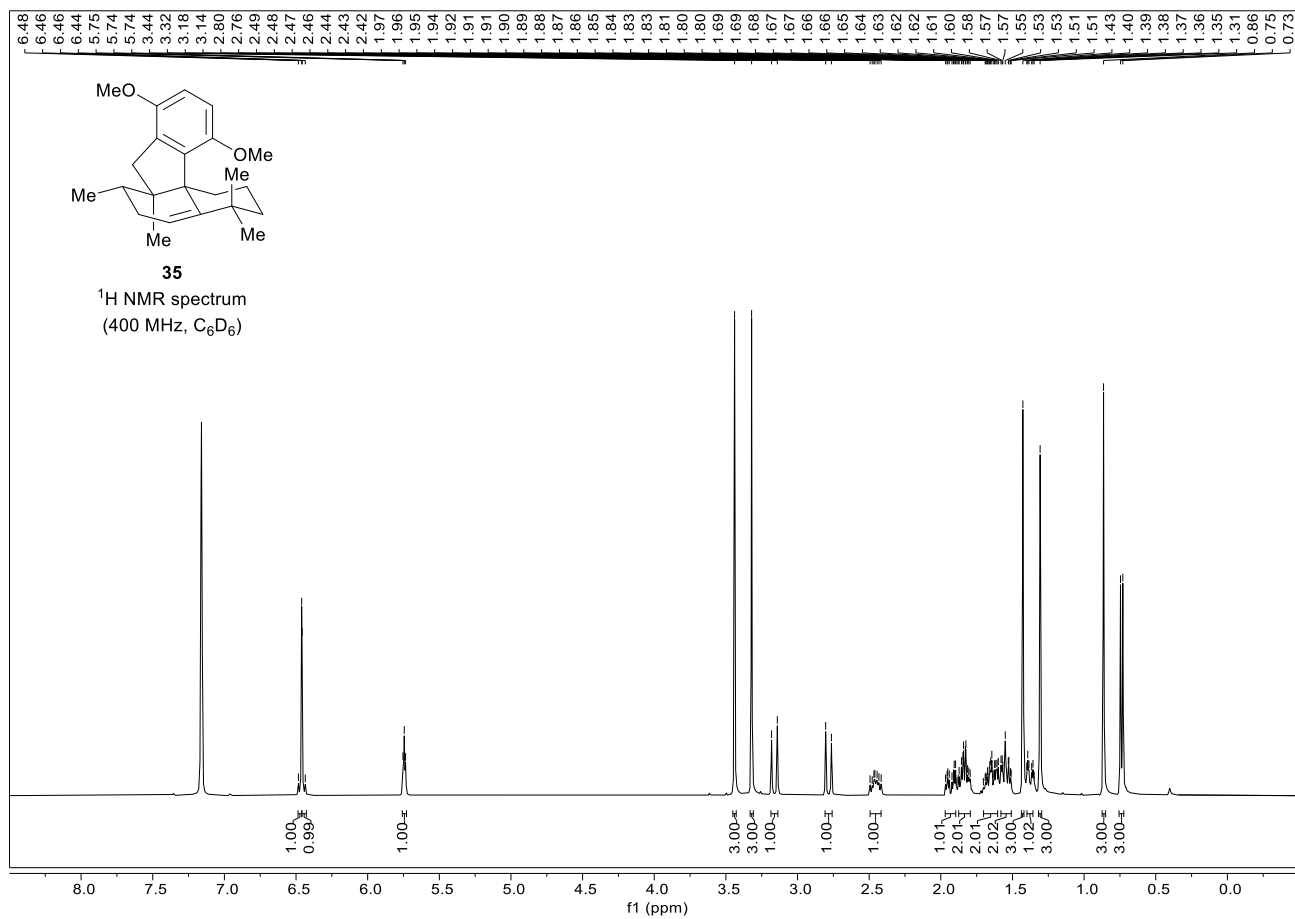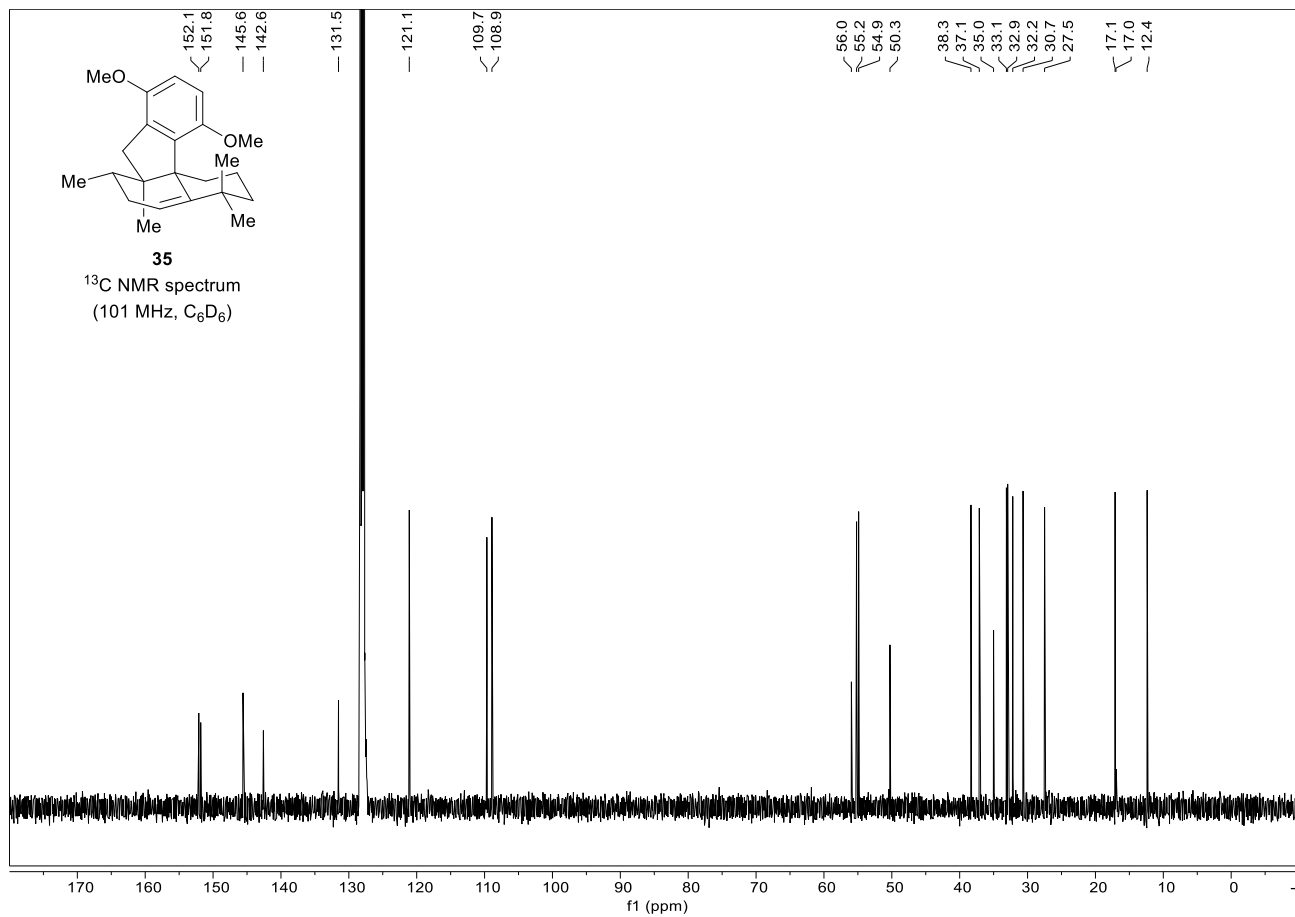

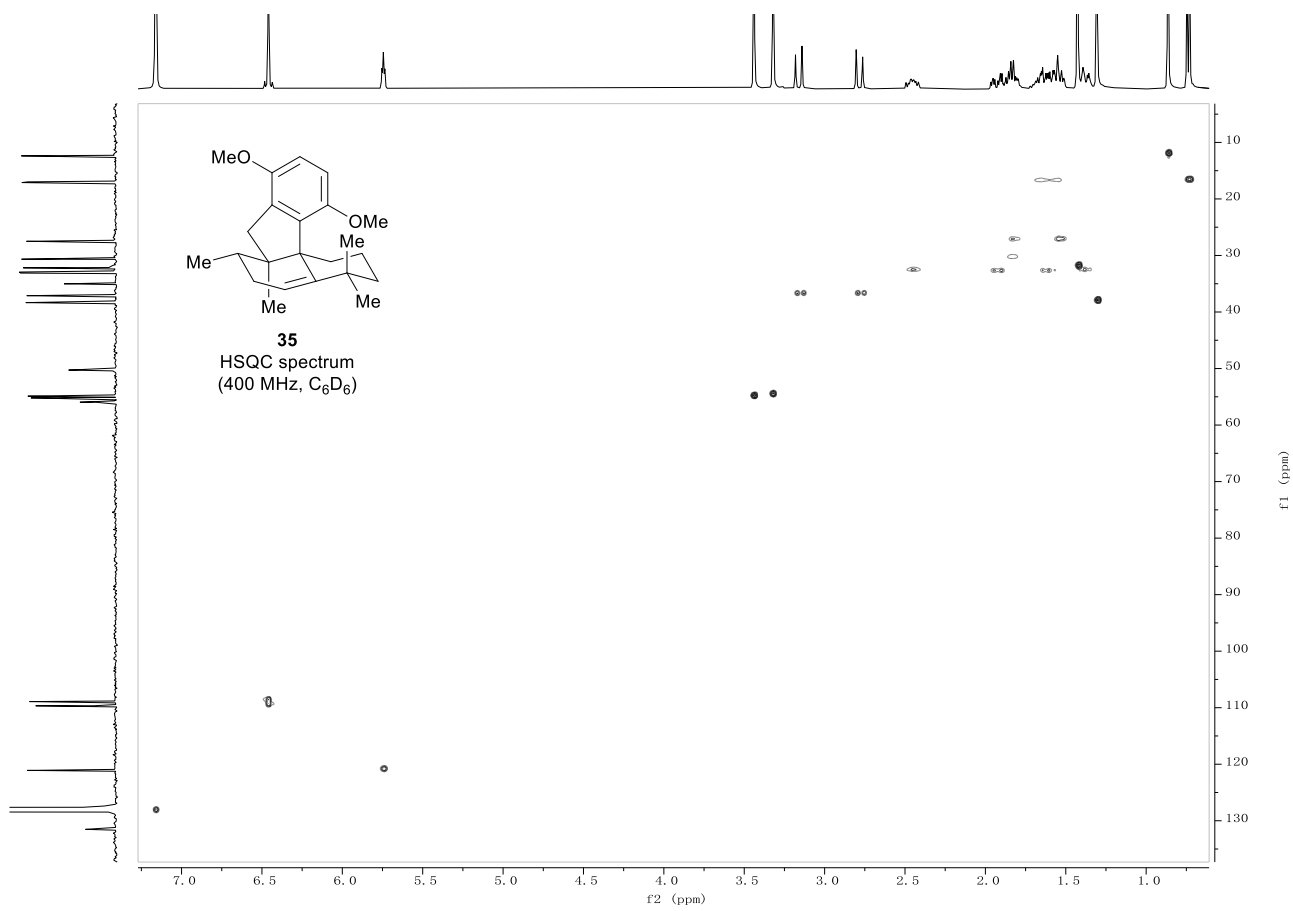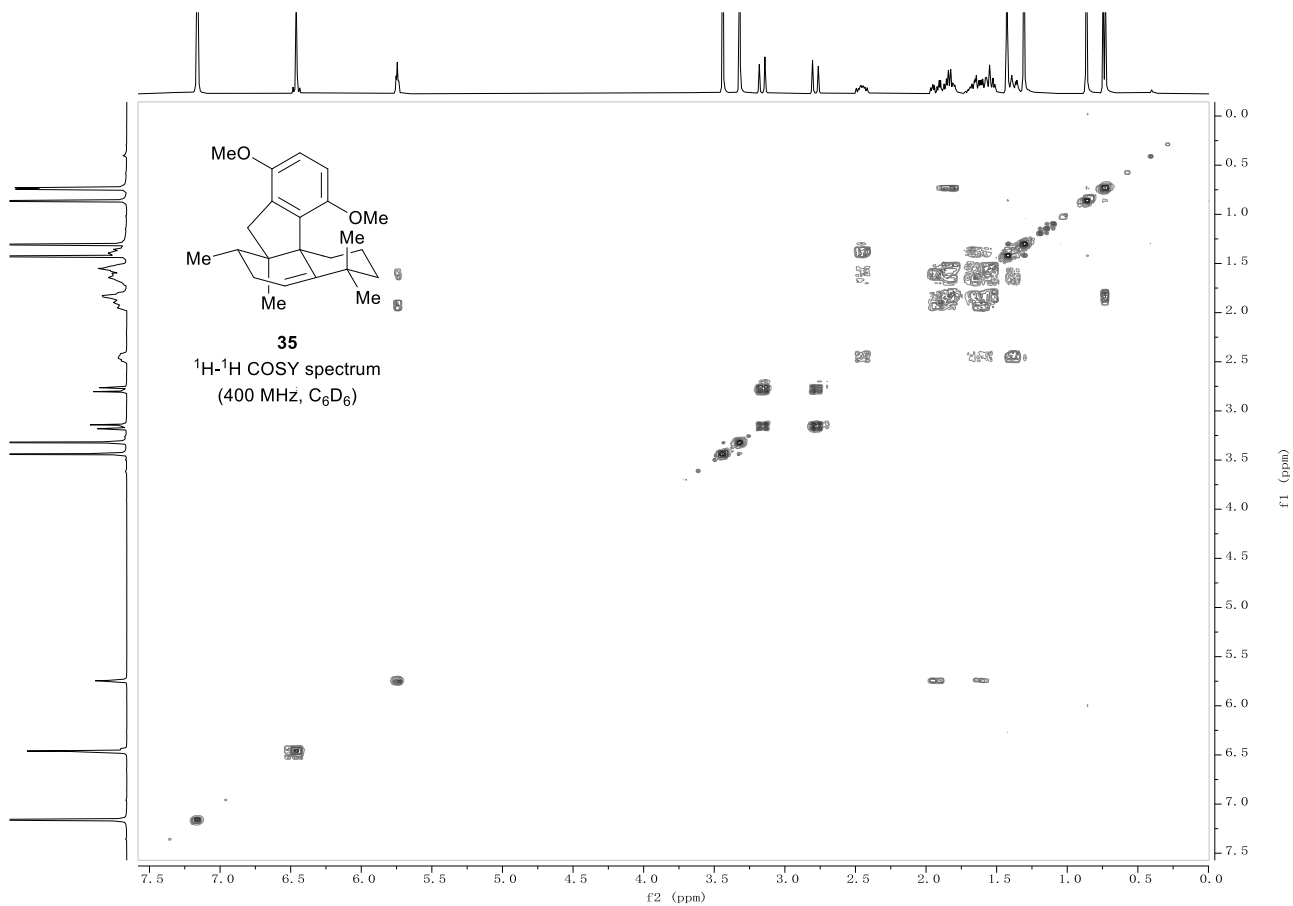

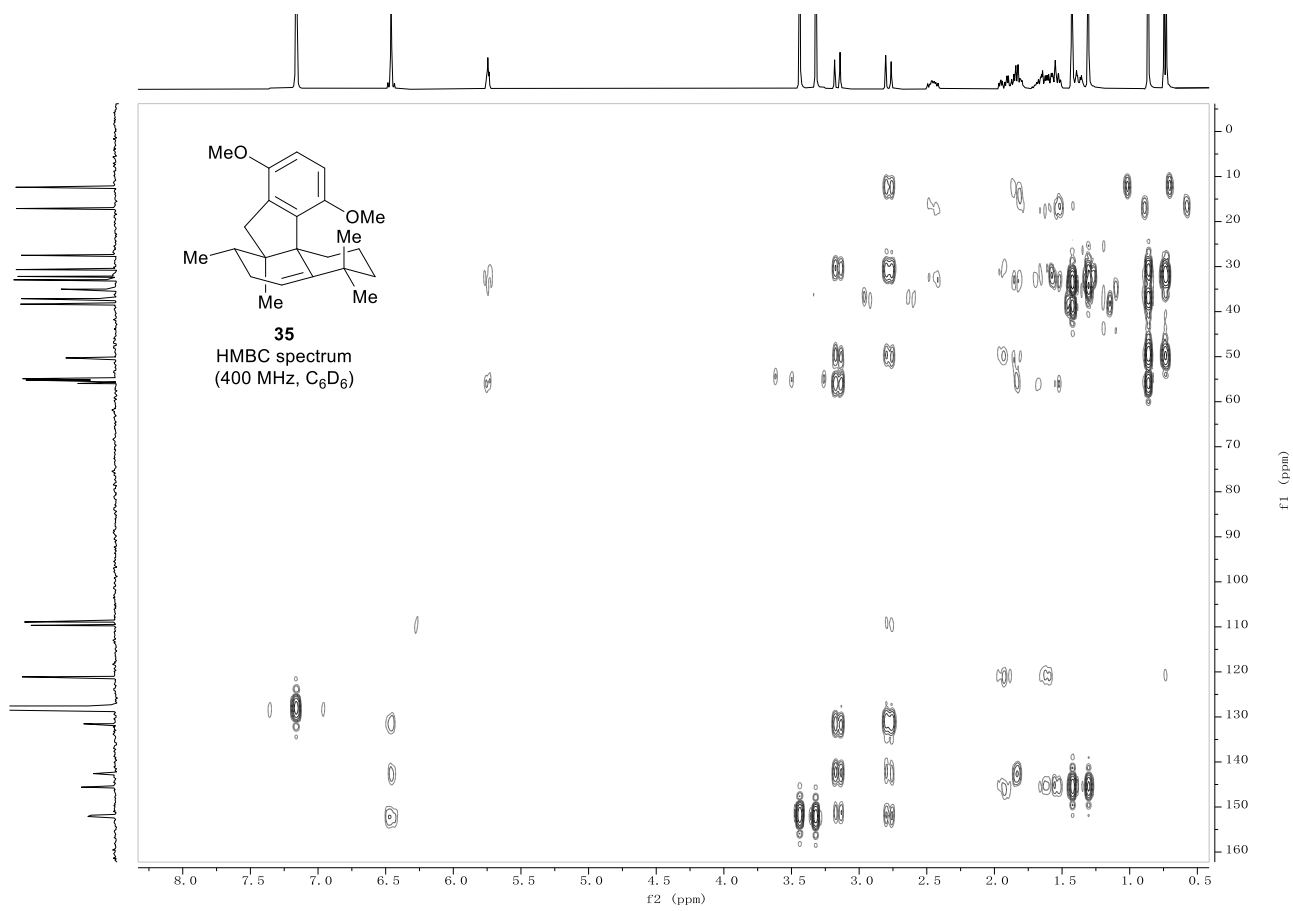



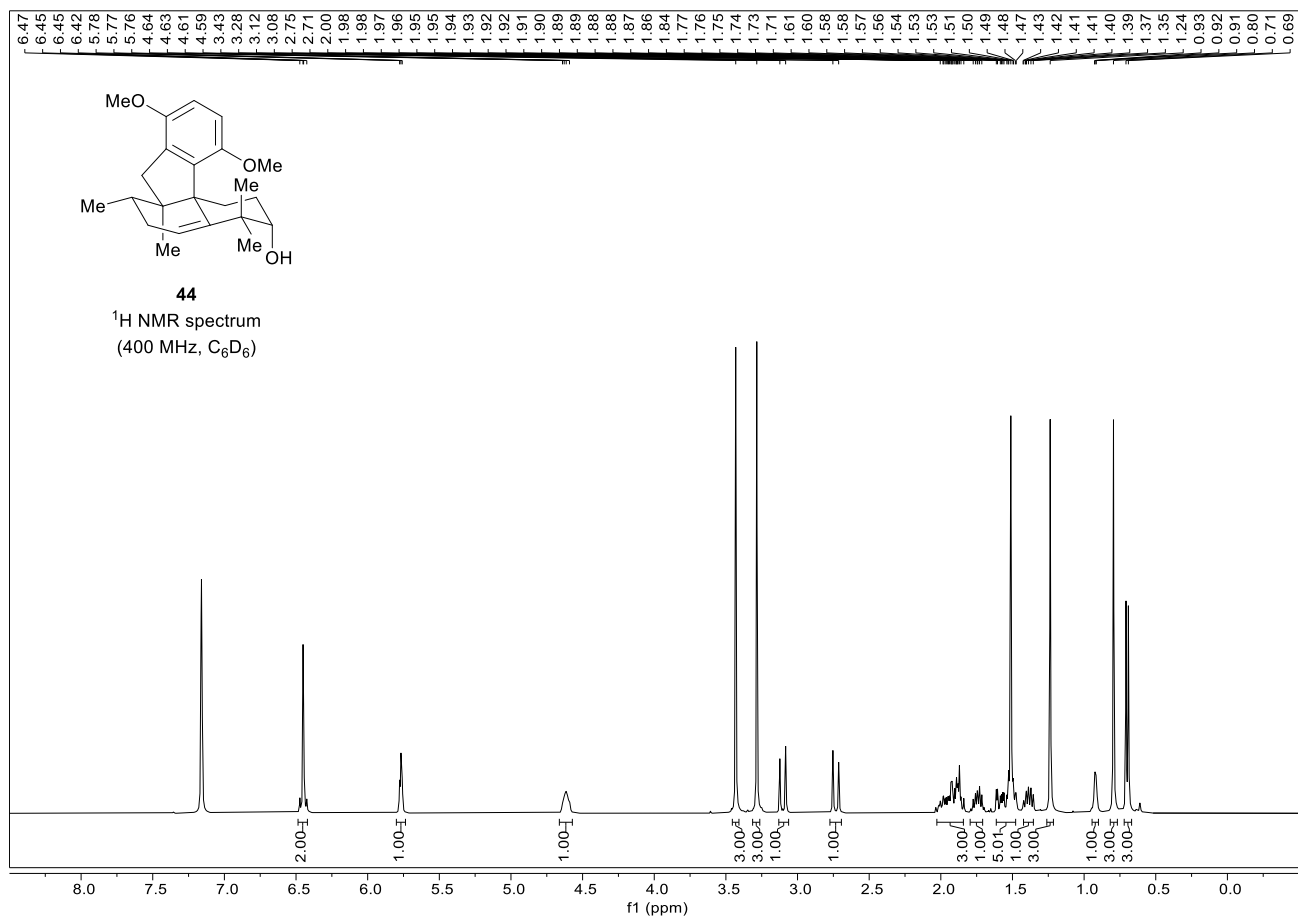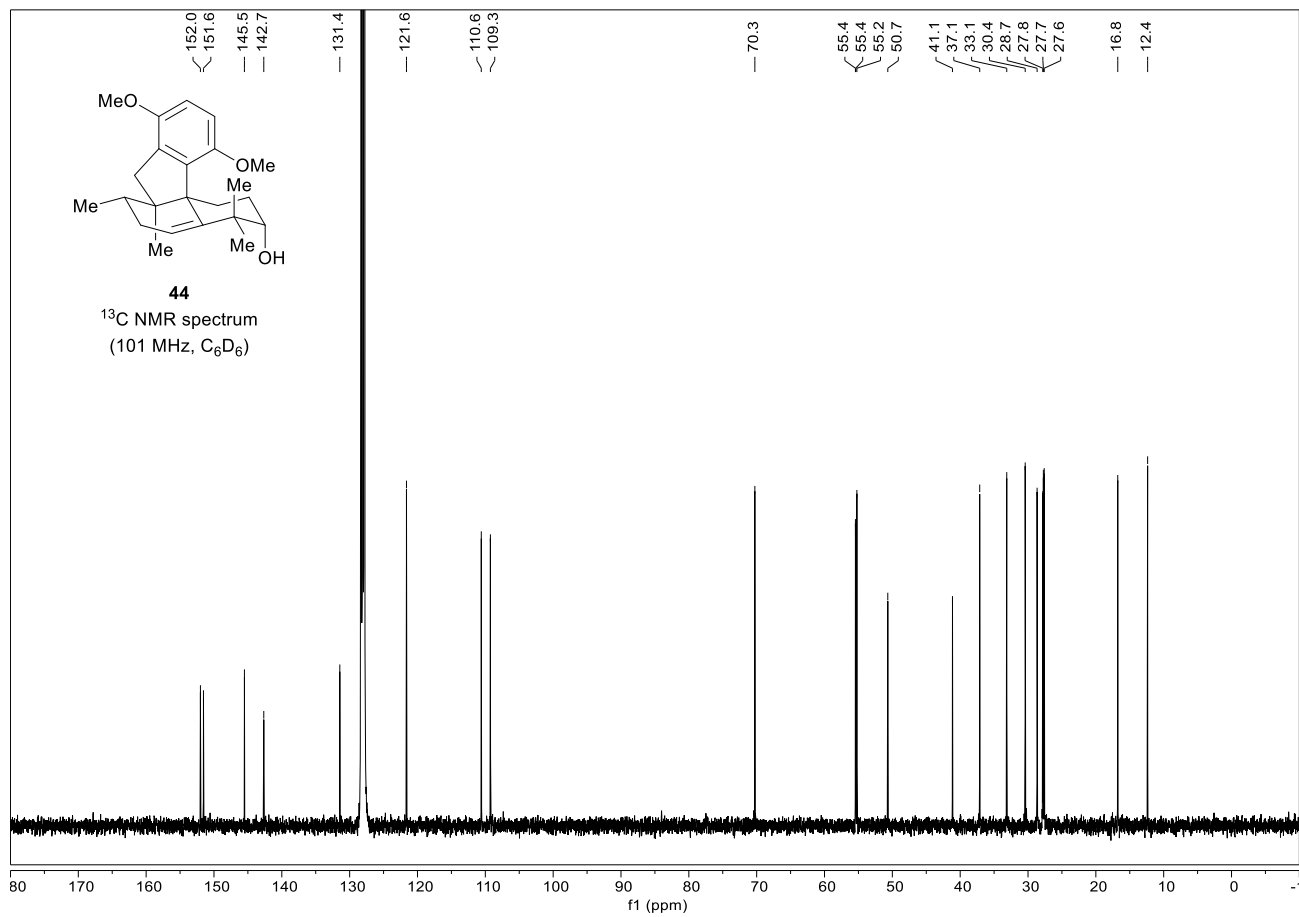

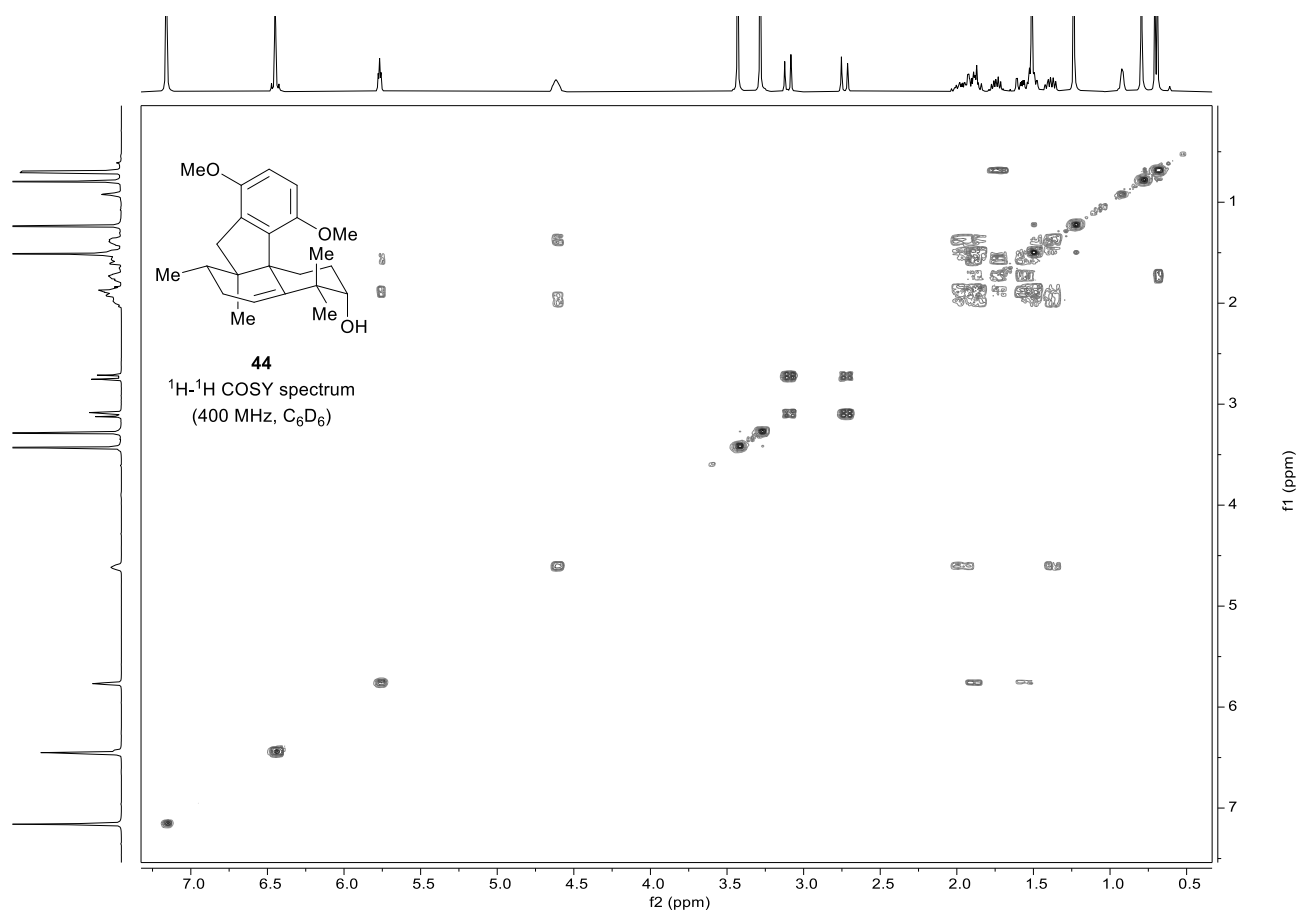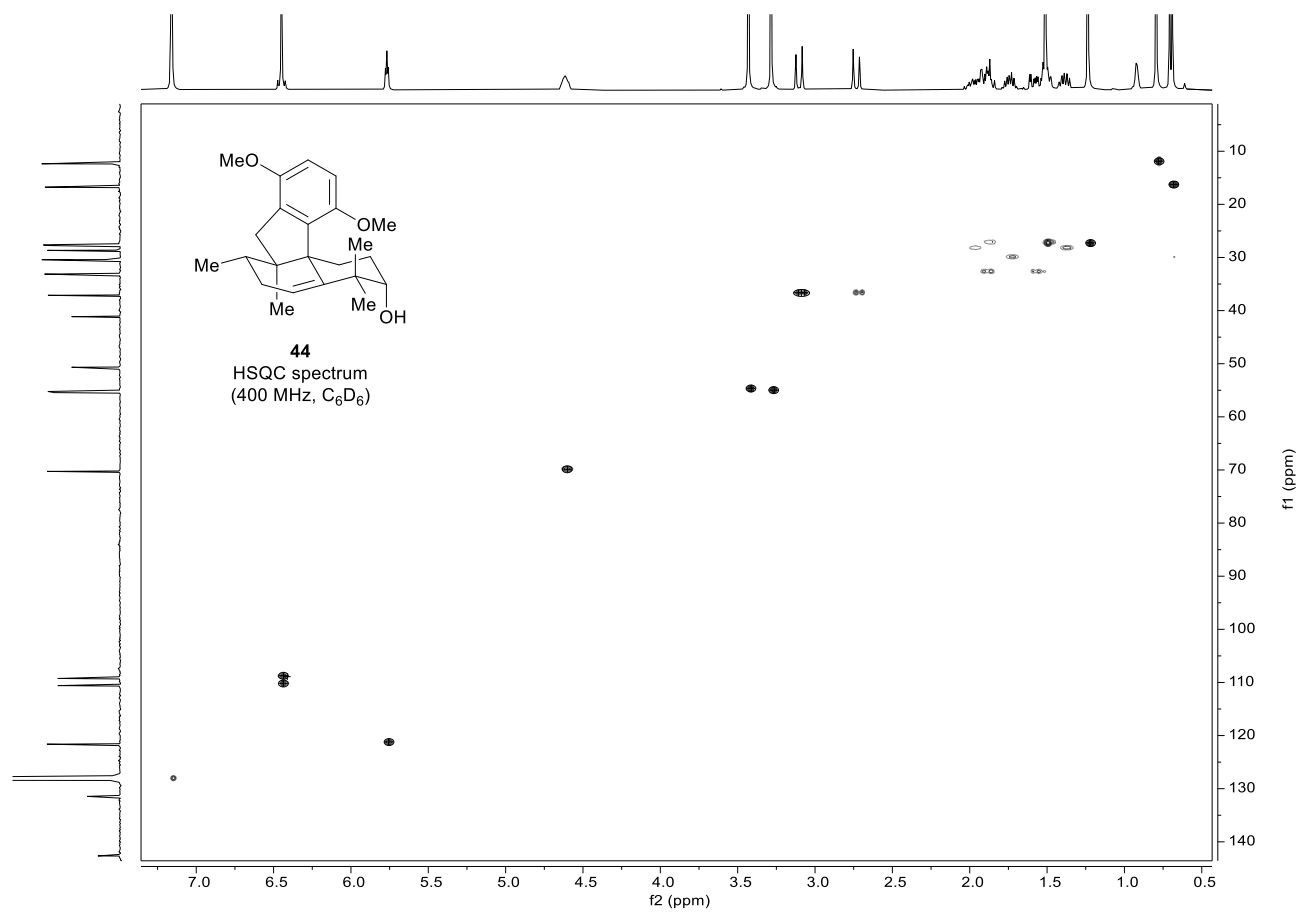

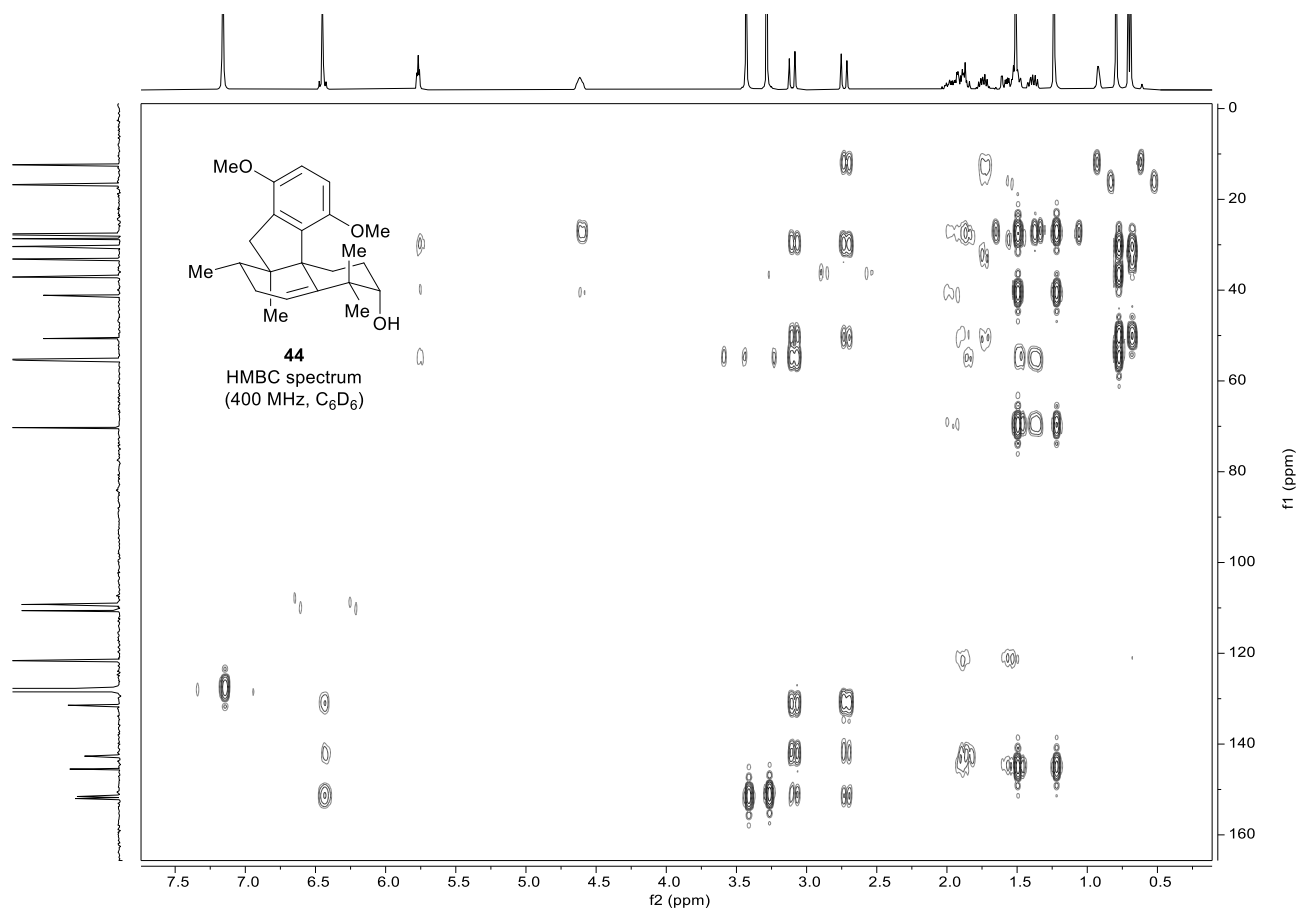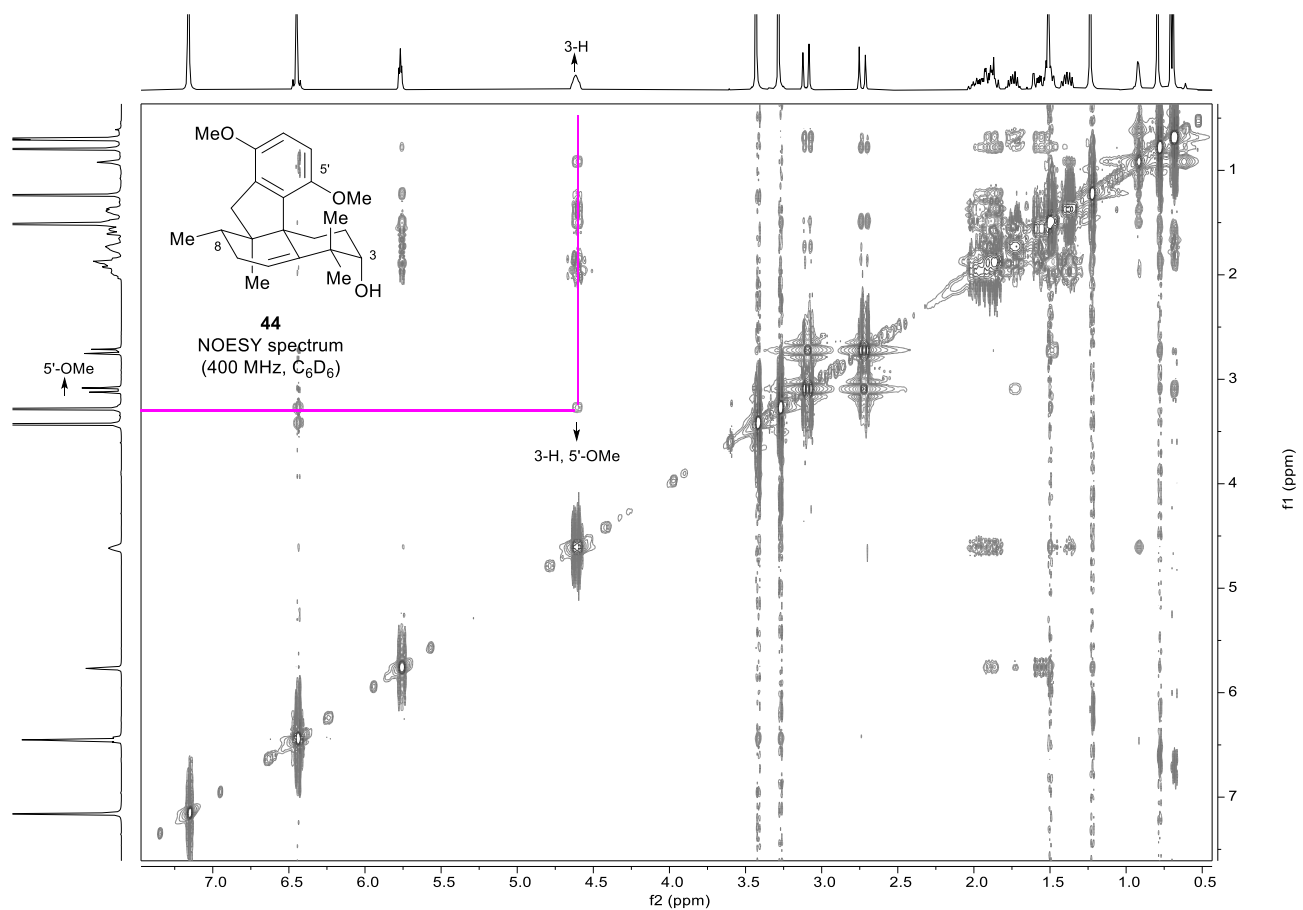

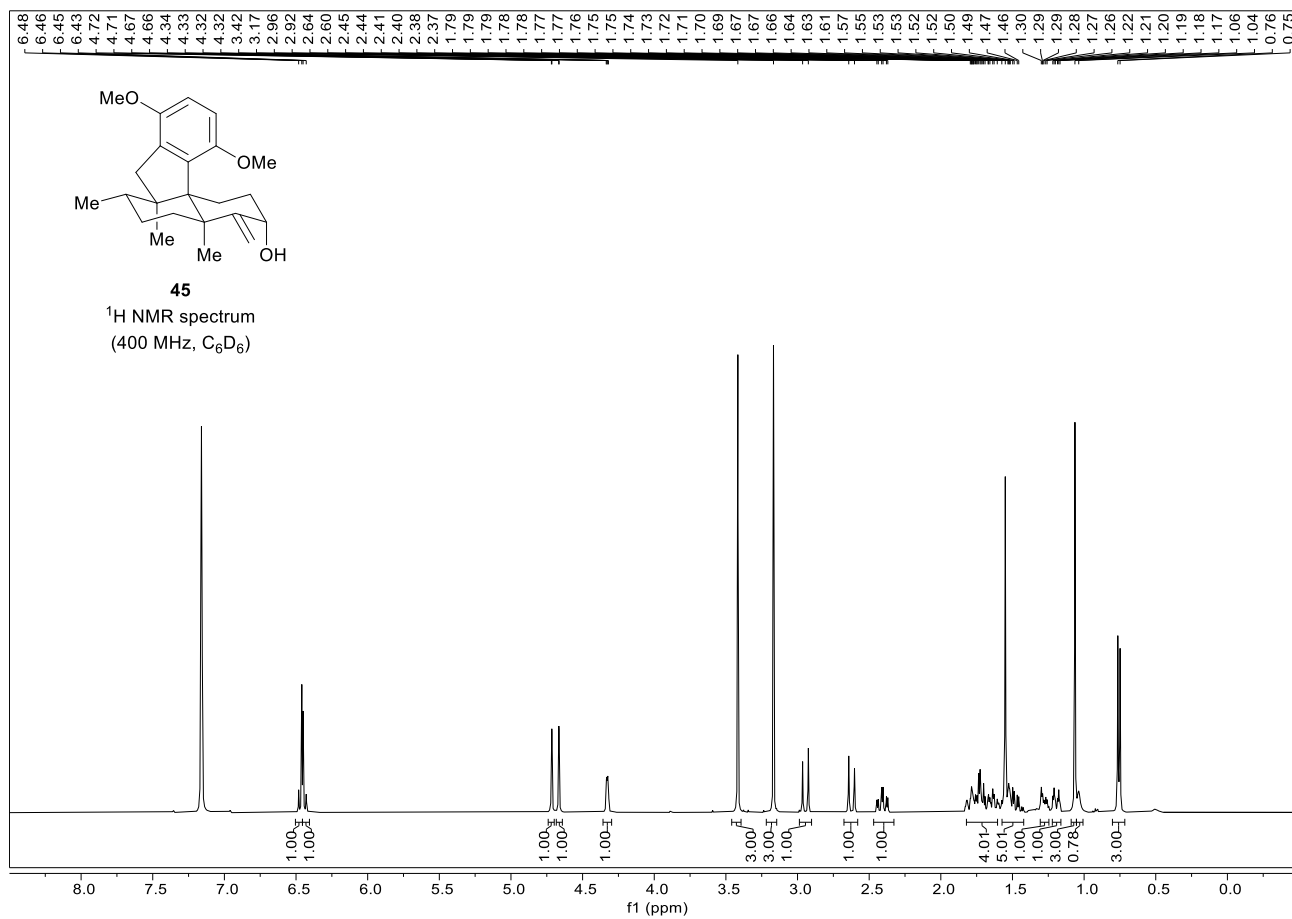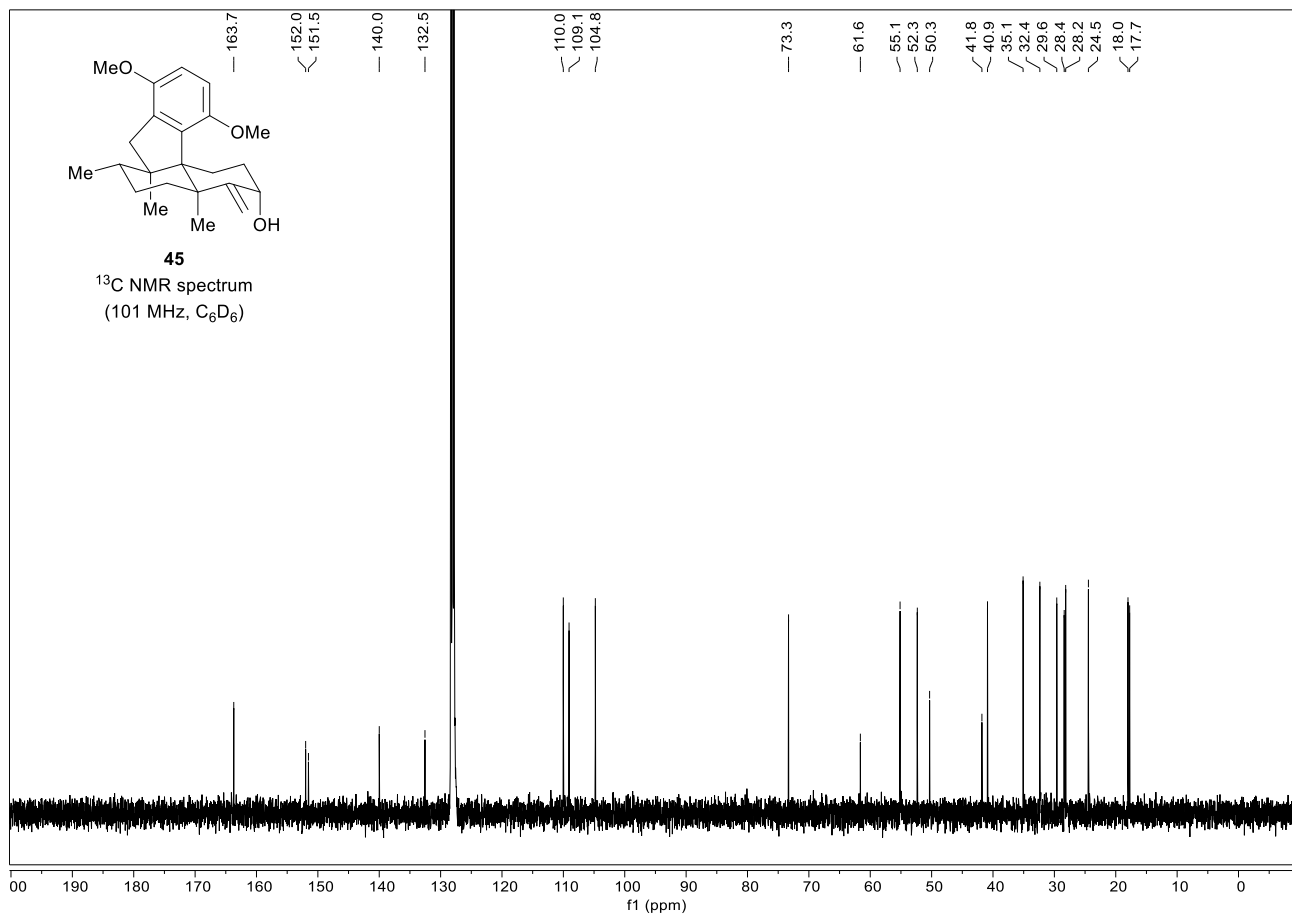

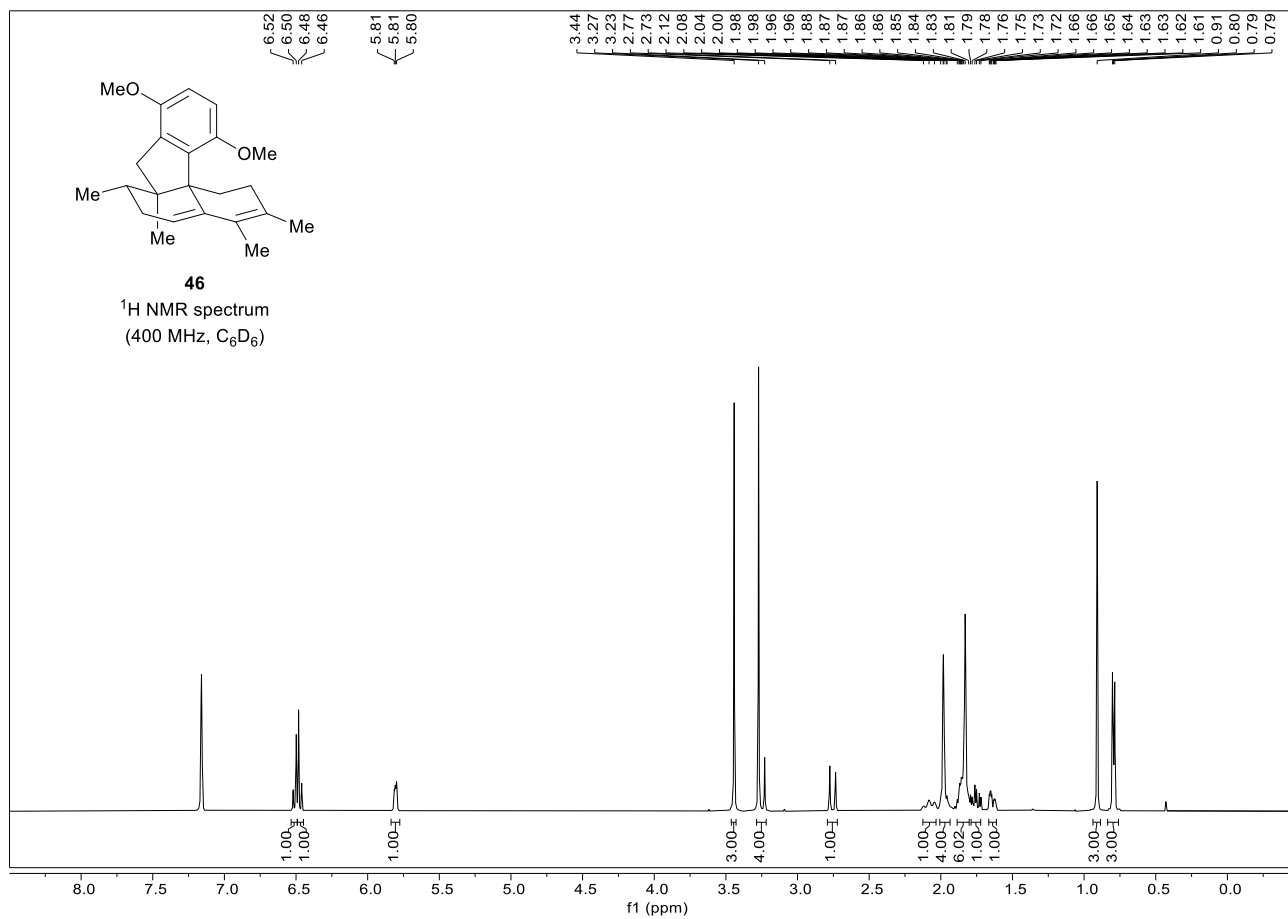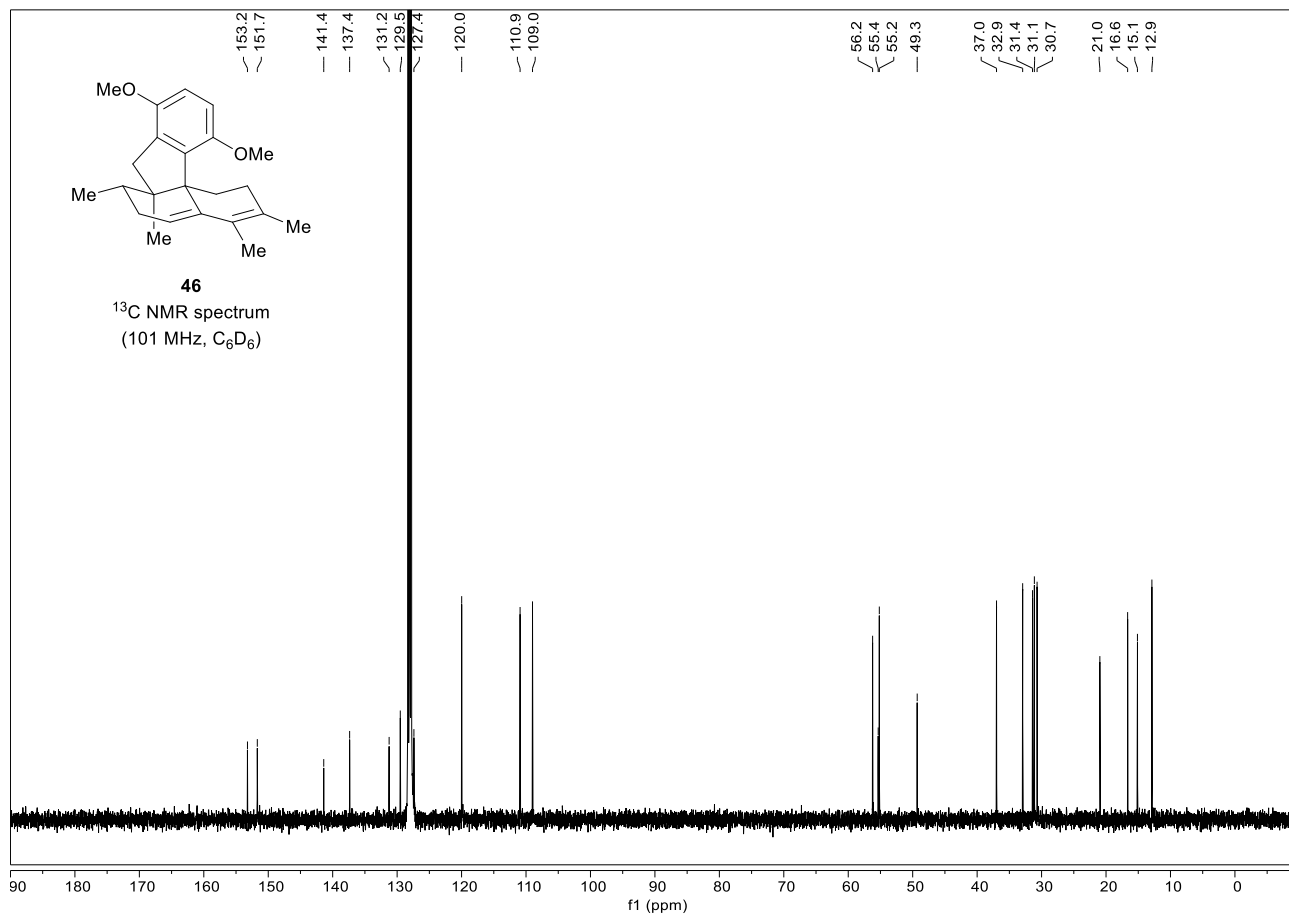

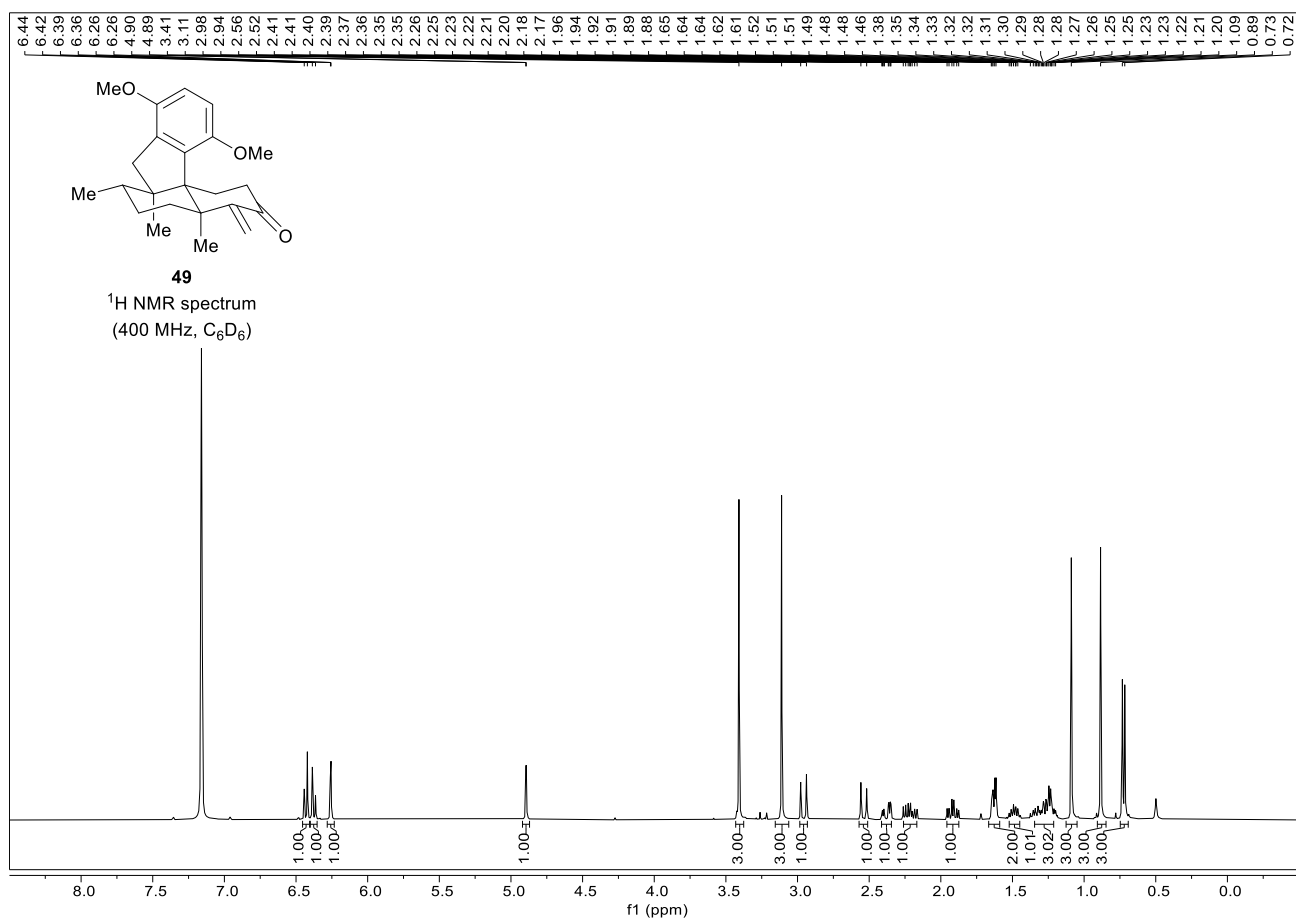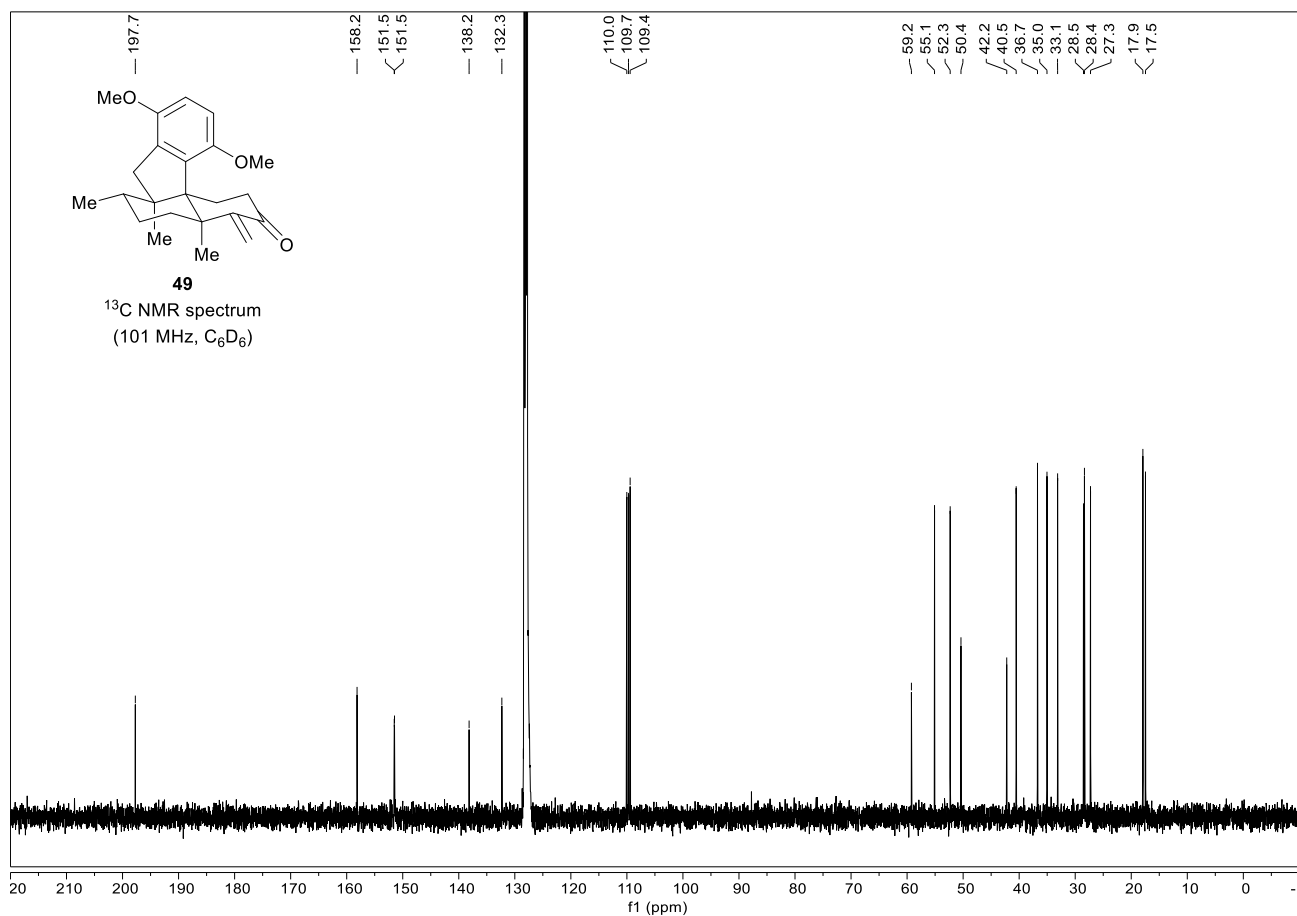

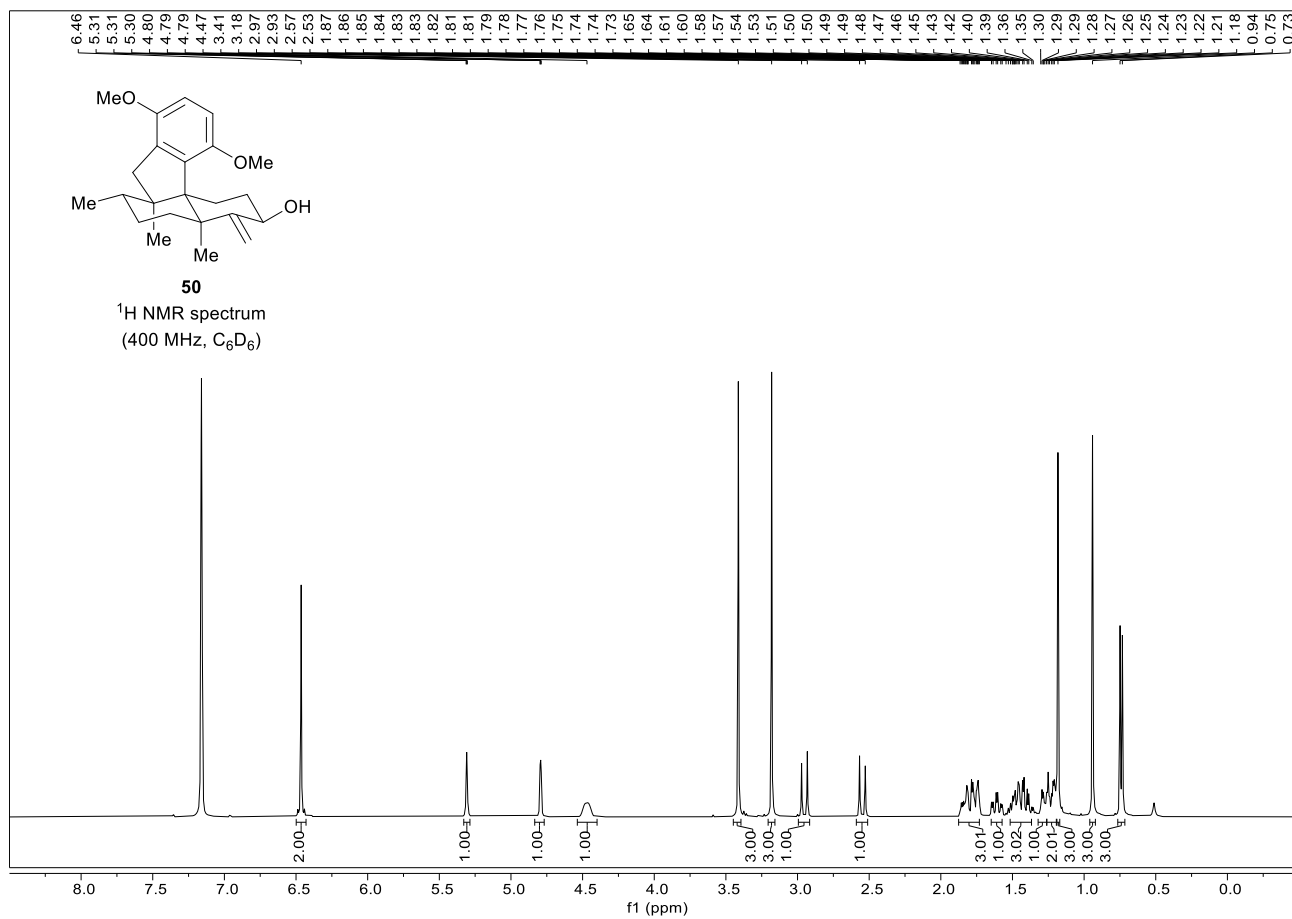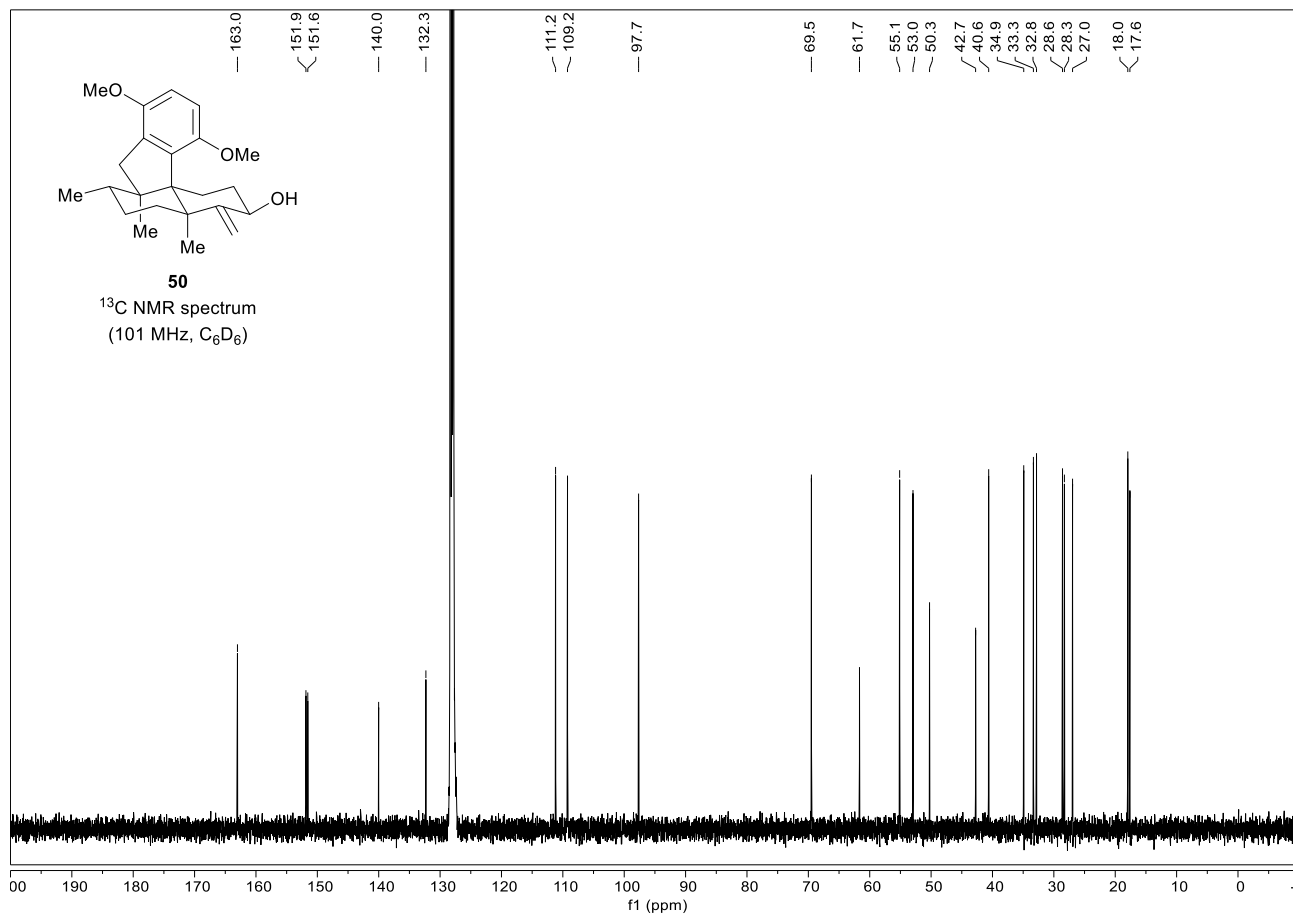

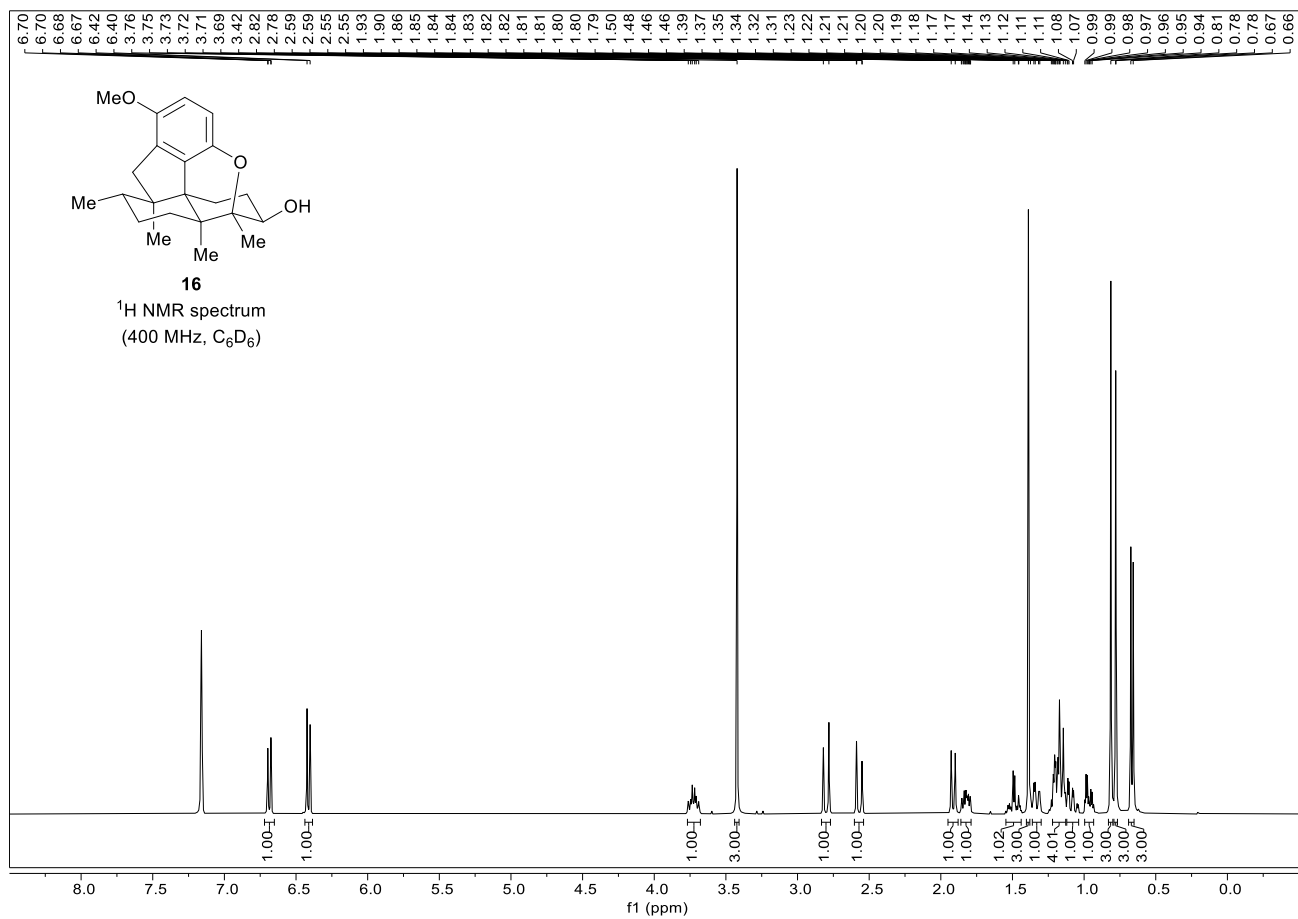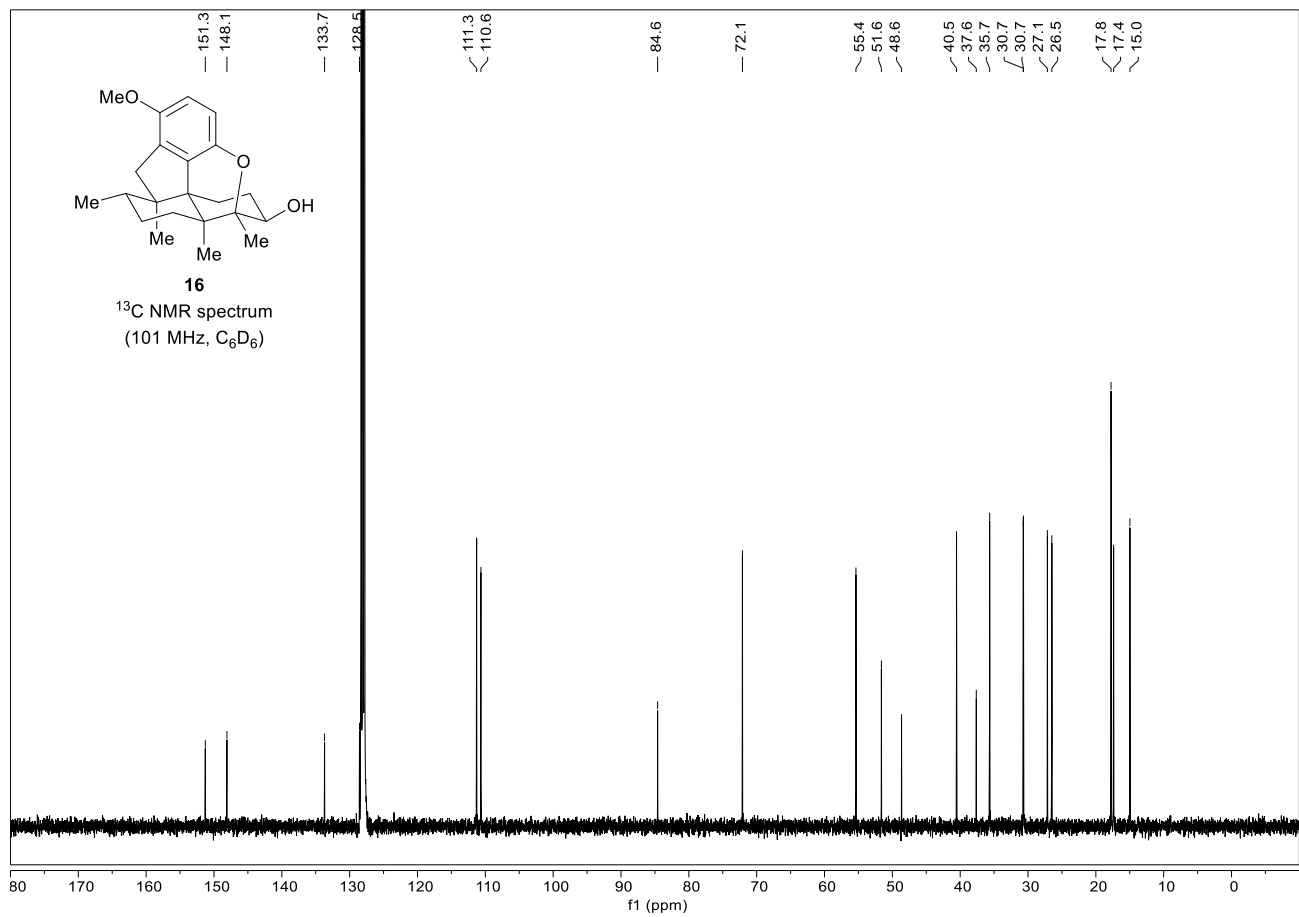





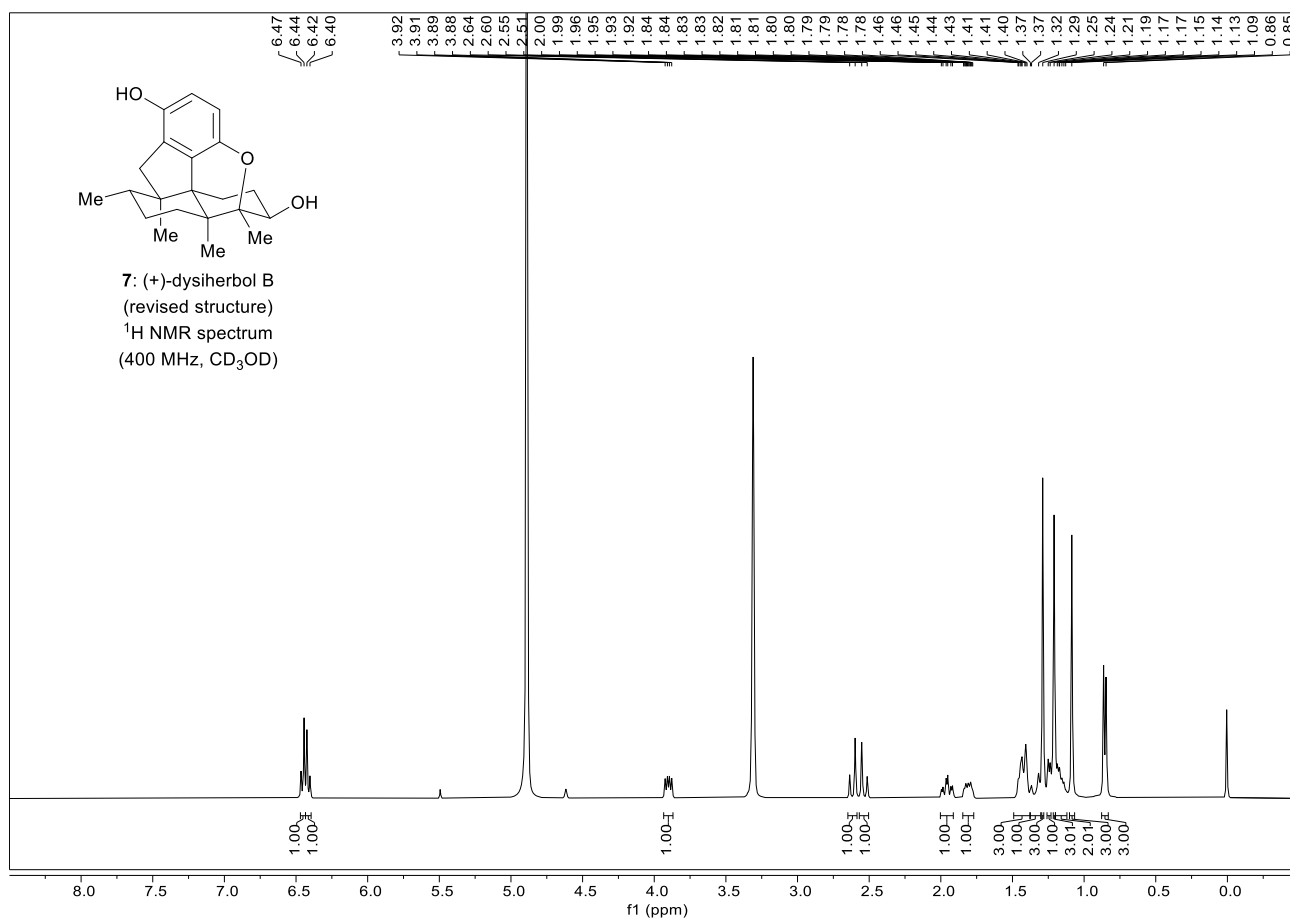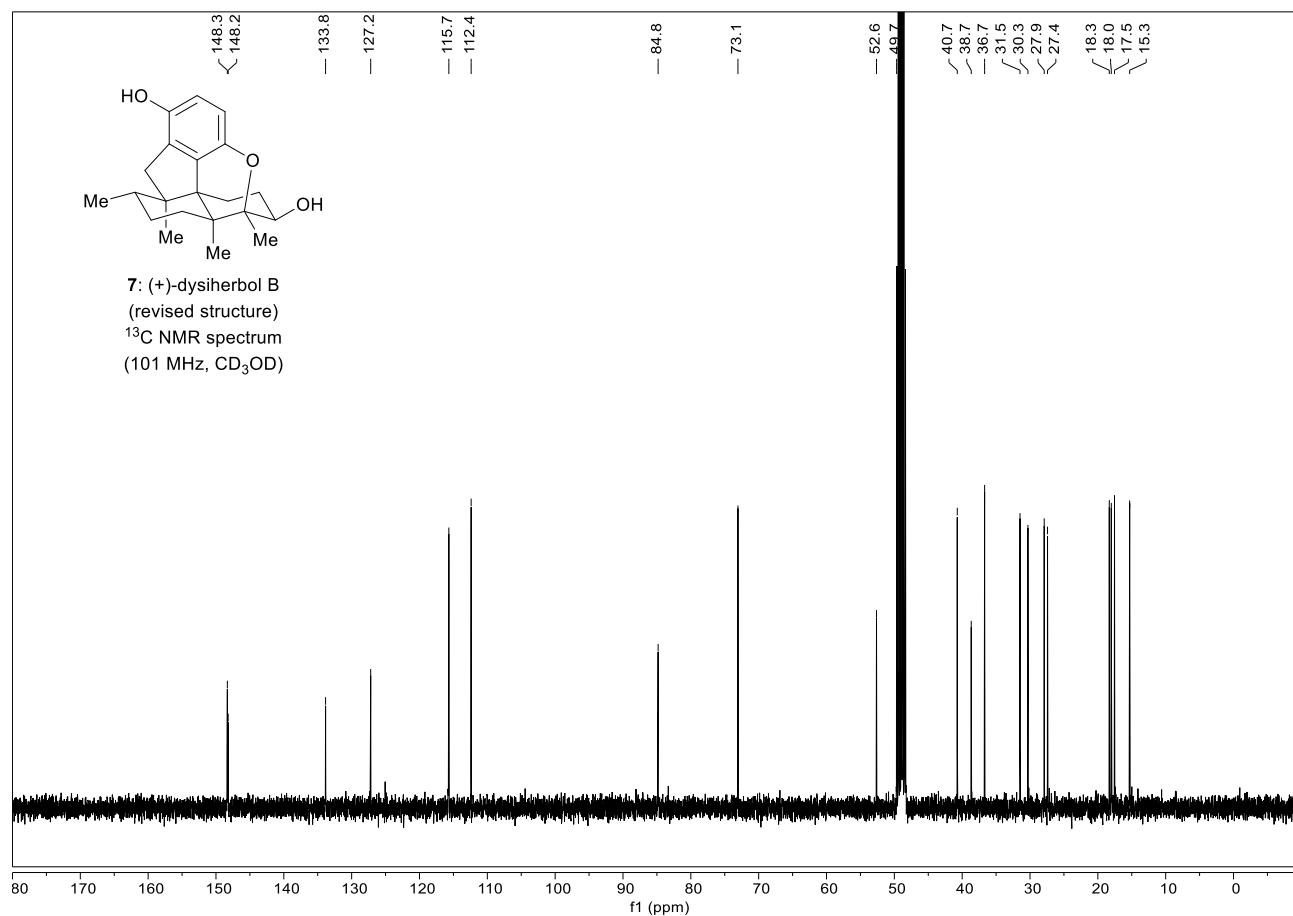

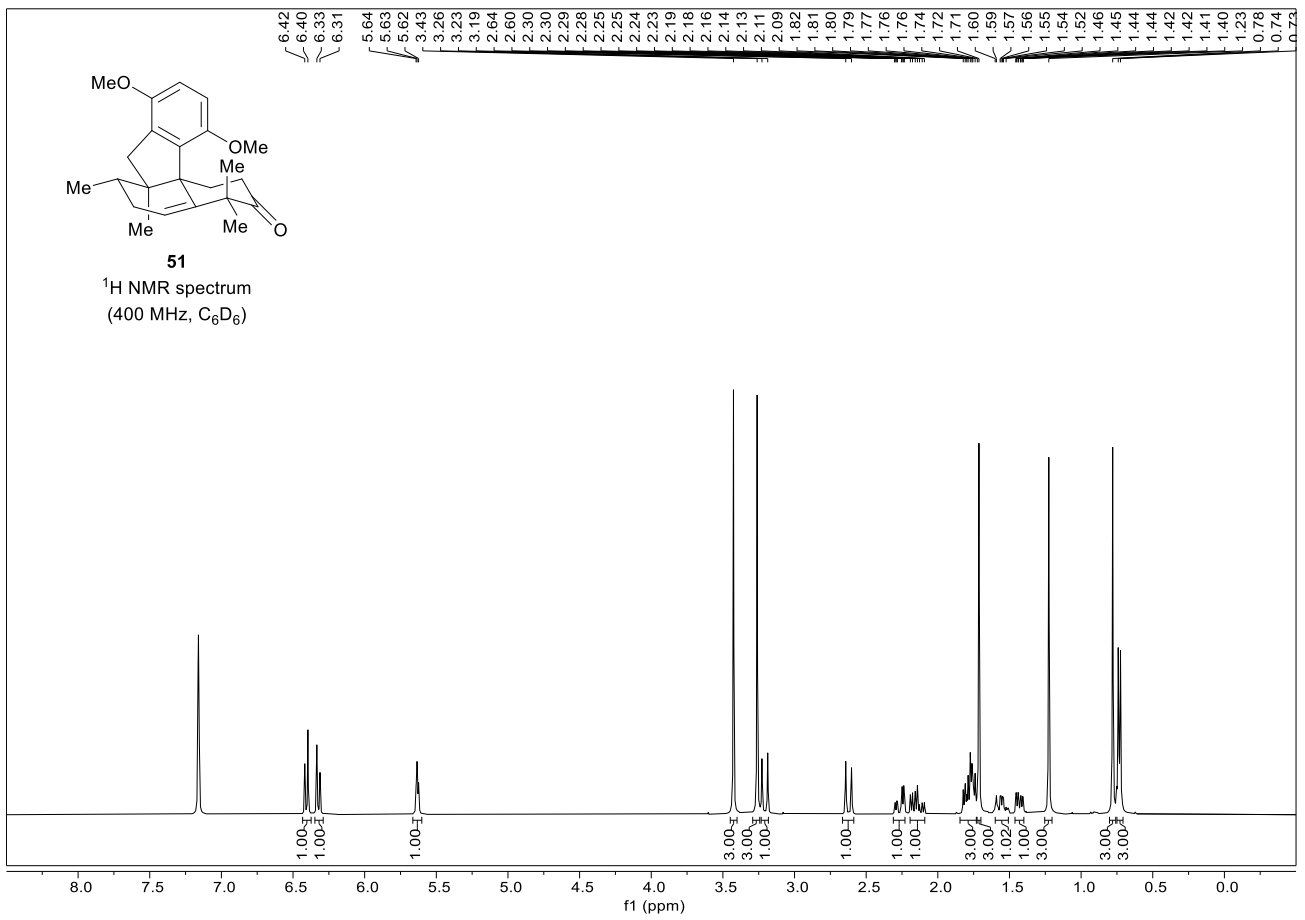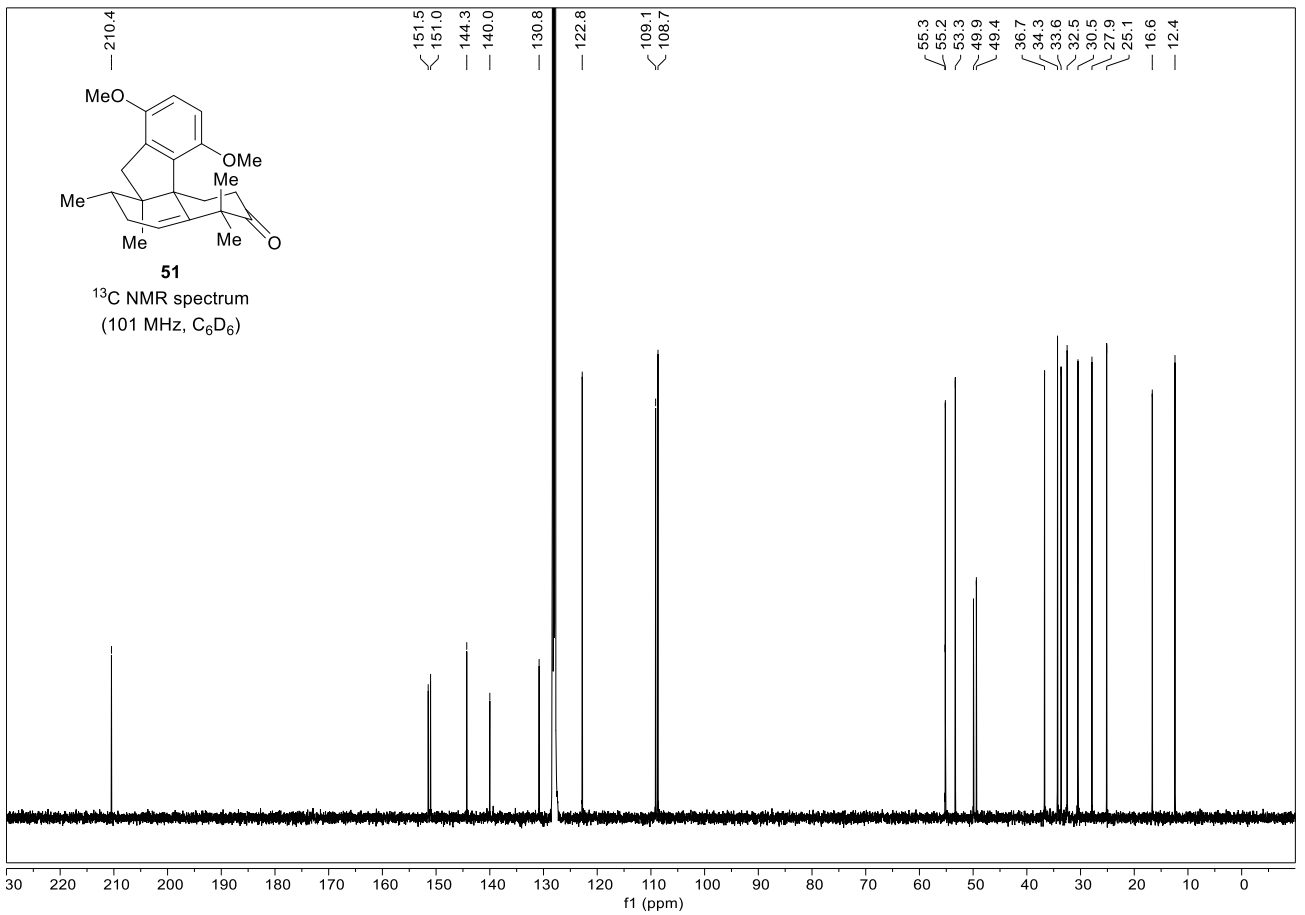

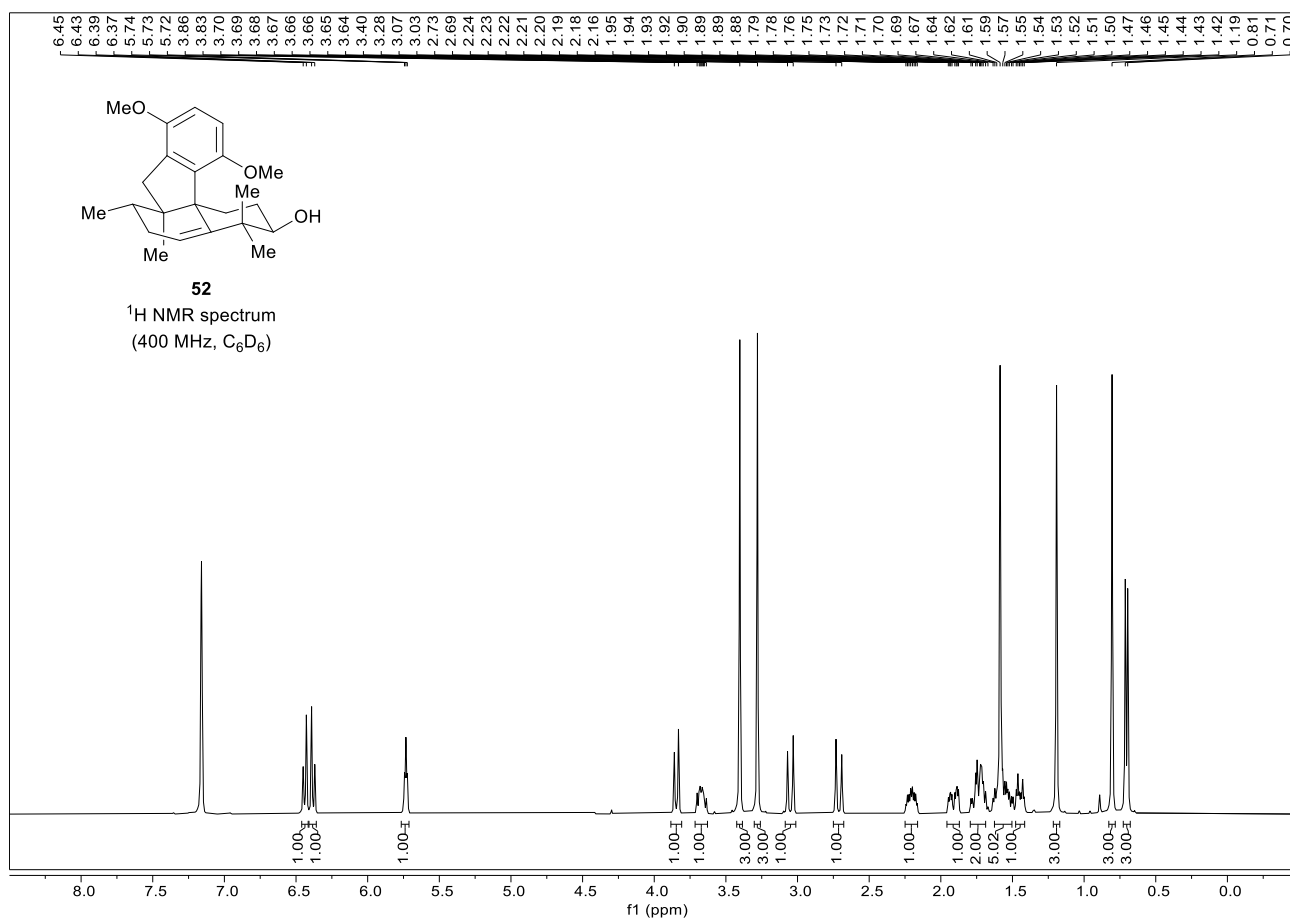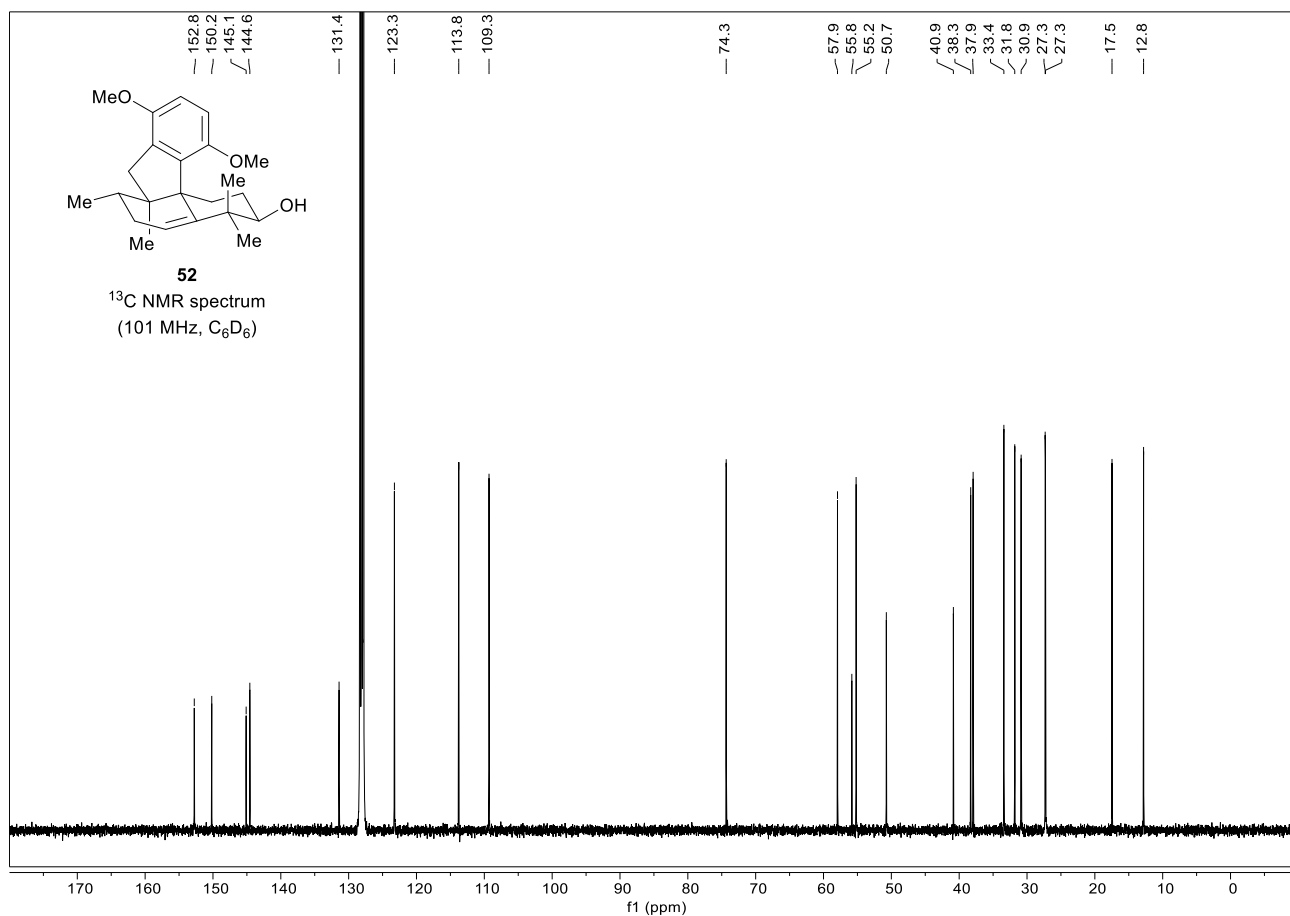

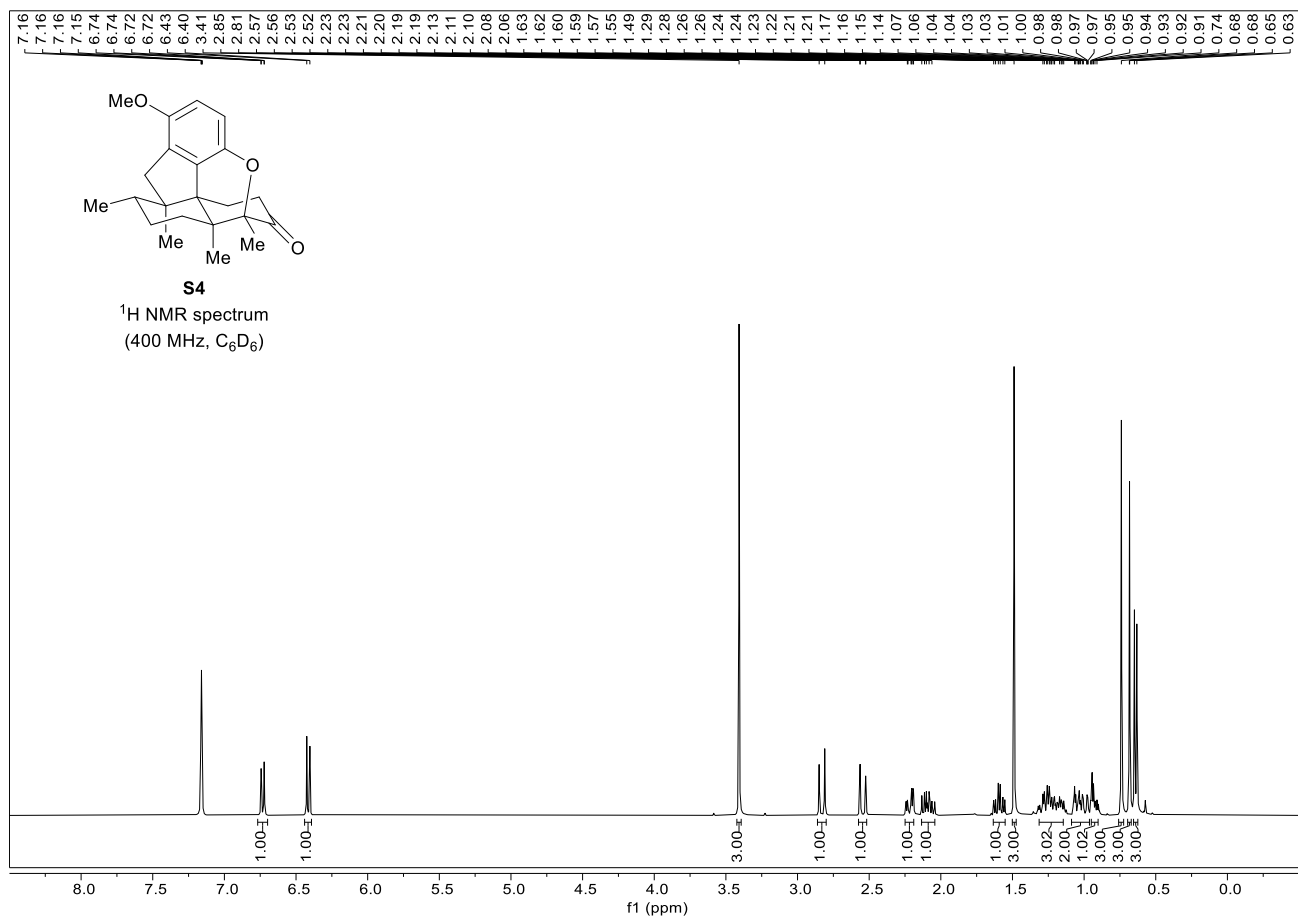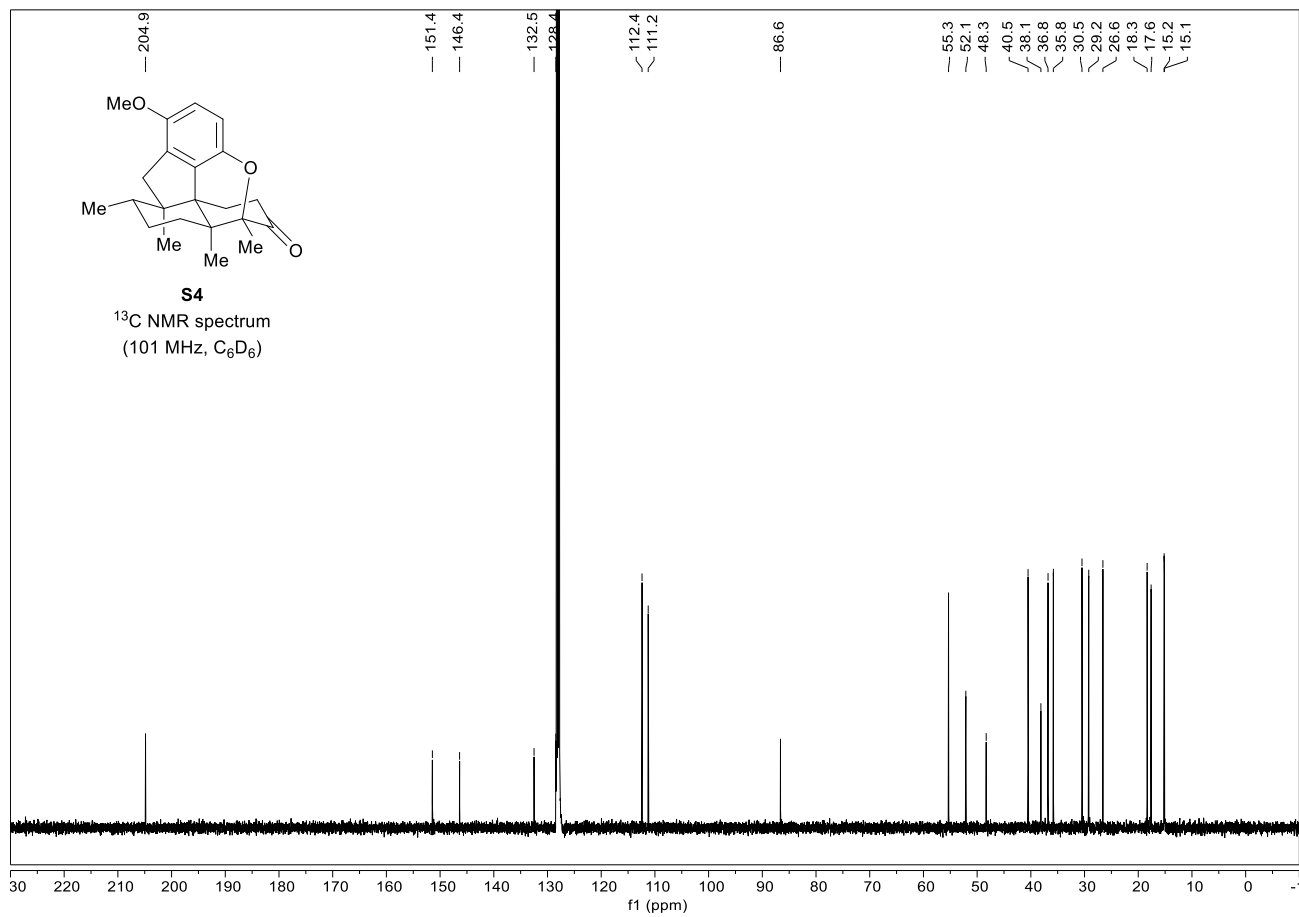





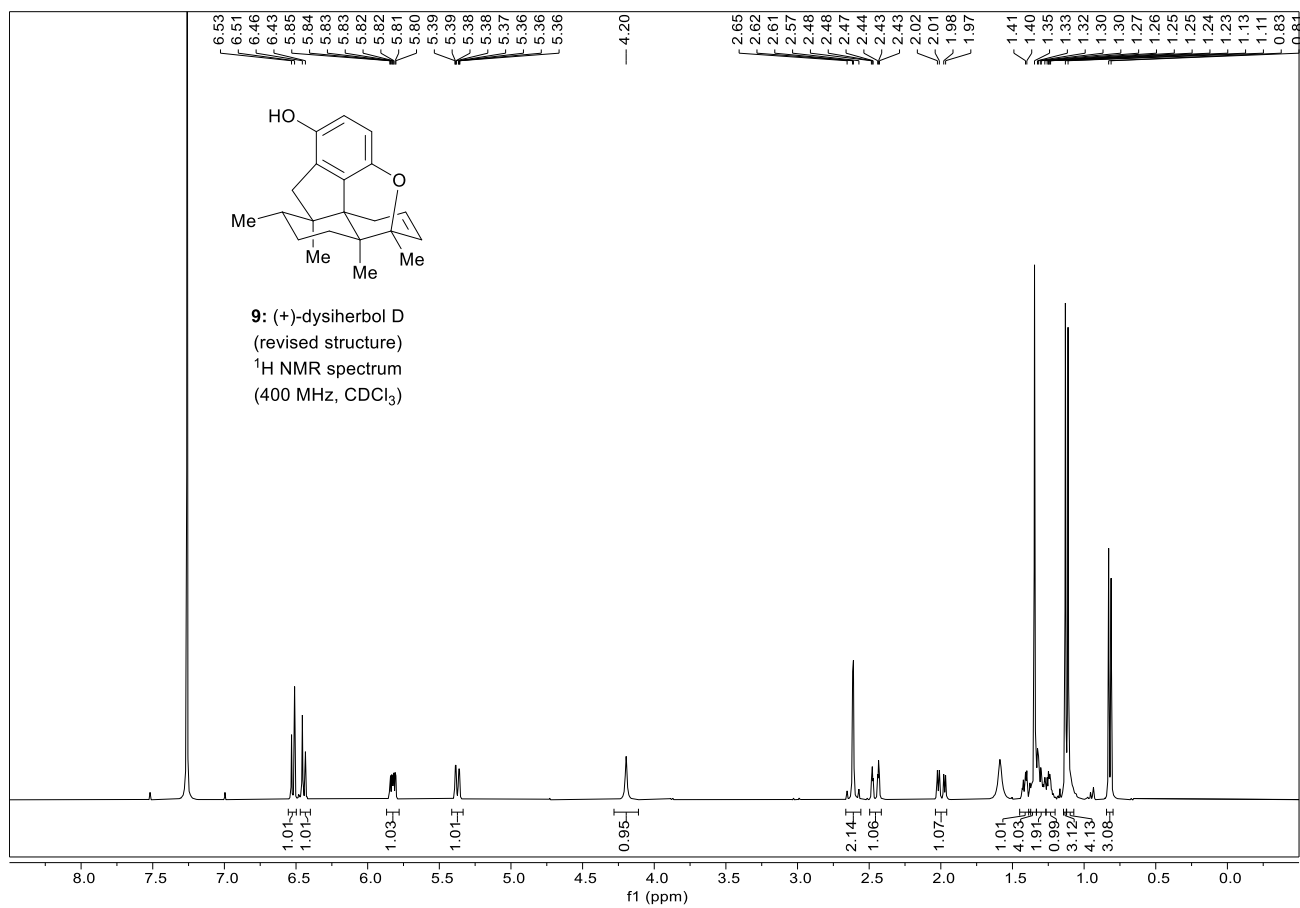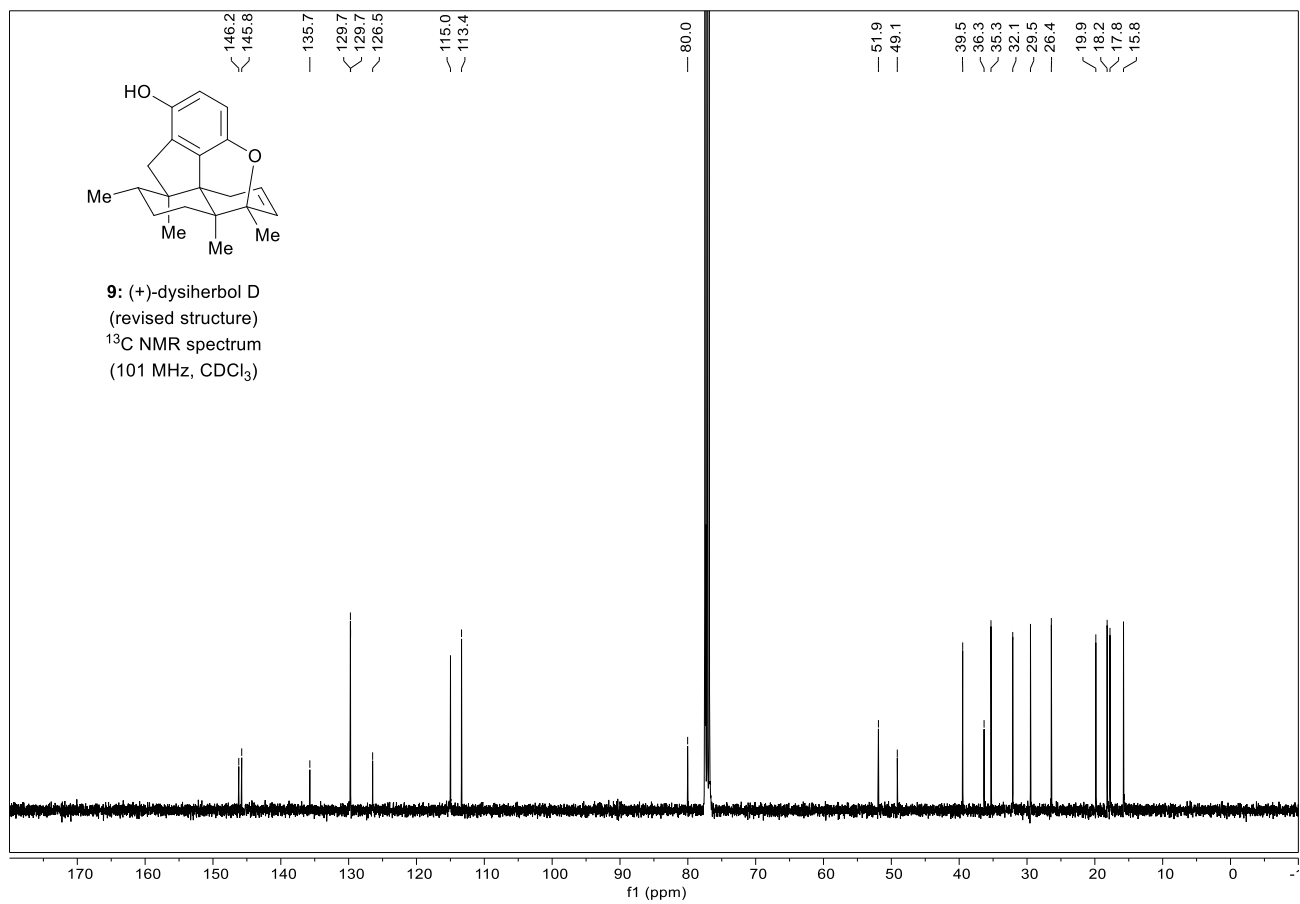



## V. X-Ray Crystallographic Data of Compounds

Table S11. Crystal data and structure refinement for allylic alcohol ( $\pm$ )-45.

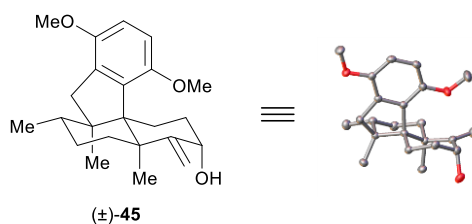

|                                             |                                                               |
|---------------------------------------------|---------------------------------------------------------------|
| Identification code                         | CCDC 2124205                                                  |
| Empirical formula                           | C <sub>23</sub> H <sub>32</sub> O <sub>3</sub>                |
| Formula weight                              | 356.51                                                        |
| Temperature/K                               | 100.00(10)                                                    |
| Crystal system                              | Orthorhombic                                                  |
| Space group                                 | Pccn                                                          |
| a/Å                                         | 36.4809(3)                                                    |
| b/Å                                         | 14.42217(12)                                                  |
| c/Å                                         | 7.54283(7)                                                    |
| $\alpha$ /°                                 | 90                                                            |
| $\beta$ /°                                  | 90                                                            |
| $\gamma$ /°                                 | 90                                                            |
| Volume/Å <sup>3</sup>                       | 3968.54(6)                                                    |
| Z                                           | 8                                                             |
| $\rho_{\text{calc.}}$ g/cm <sup>3</sup>     | 1.223                                                         |
| $\mu$ /mm <sup>-1</sup>                     | 0.636                                                         |
| F(000)                                      | 1592.0                                                        |
| Crystal size/mm <sup>3</sup>                | 0.28 × 0.23 × 0.22                                            |
| Radiation                                   | CuK $\alpha$ ( $\lambda$ = 1.54184)                           |
| 2 $\theta$ range for data collection/°      | 13.202 to 151.754                                             |
| Index ranges                                | -42 ≤ h ≤ 45, -18 ≤ k ≤ 15, -8 ≤ l ≤ 5                        |
| Reflections collected                       | 18252                                                         |
| Independent reflections                     | 4011 [R <sub>int</sub> = 0.0223, R <sub>sigma</sub> = 0.0184] |
| Data/restraints/parameters                  | 4011/0/249                                                    |
| Goodness-of-fit on F <sup>2</sup>           | 1.045                                                         |
| Final R indexes                             | R <sub>1</sub> = 0.0387, wR <sub>2</sub> = 0.1024             |
| Final R indexes [all data]                  | R <sub>1</sub> = 0.0409, wR <sub>2</sub> = 0.1041             |
| Largest diff. peak/hole / e Å <sup>-3</sup> | 0.32/-0.32                                                    |

**Table S12. Crystal data and structure refinement for diene (±)-(46).**

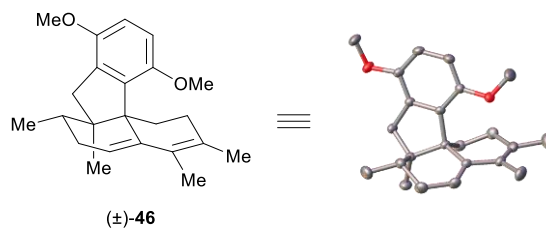

|                                             |                                                               |
|---------------------------------------------|---------------------------------------------------------------|
| Identification code                         | CCDC 2192301                                                  |
| Empirical formula                           | C <sub>23</sub> H <sub>30</sub> O <sub>2</sub>                |
| Formula weight                              | 338.47                                                        |
| Temperature/K                               | 113.15                                                        |
| Crystal system                              | monoclinic                                                    |
| Space group                                 | Cc                                                            |
| a/Å                                         | 9.6931(4)                                                     |
| b/Å                                         | 25.8093(8)                                                    |
| c/Å                                         | 7.4931(3)                                                     |
| α/°                                         | 90                                                            |
| β/°                                         | 102.745(4)                                                    |
| γ/°                                         | 90                                                            |
| Volume/Å <sup>3</sup>                       | 1828.38(12)                                                   |
| Z                                           | 4                                                             |
| ρ <sub>calc.</sub> g/cm <sup>3</sup>        | 1.230                                                         |
| μ/mm <sup>-1</sup>                          | 0.076                                                         |
| F(000)                                      | 736.0                                                         |
| Crystal size/mm <sup>3</sup>                | 0.25 × 0.2 × 0.16                                             |
| Radiation                                   | Mo Kα (λ = 0.71073)                                           |
| 2 <sup>θ</sup> range for data collection/°  | 4.588 to 67.262                                               |
| Index ranges                                | -15 ≤ h ≤ 10, -39 ≤ k ≤ 39, -11 ≤ l ≤ 10                      |
| Reflections collected                       | 11231                                                         |
| Independent reflections                     | 5088 [R <sub>int</sub> = 0.0409, R <sub>sigma</sub> = 0.0531] |
| Data/restraints/parameters                  | 5088/2/233                                                    |
| Goodness-of-fit on F <sup>2</sup>           | 1.031                                                         |
| Final R indexes                             | R <sub>1</sub> = 0.0503, wR <sub>2</sub> = 0.1148             |
| Final R indexes [all data]                  | R <sub>1</sub> = 0.0613, wR <sub>2</sub> = 0.1241             |
| Largest diff. peak/hole / e Å <sup>-3</sup> | 0.25/-0.20                                                    |

**Table S13. Crystal data and structure refinement for ketone (±)-51.**

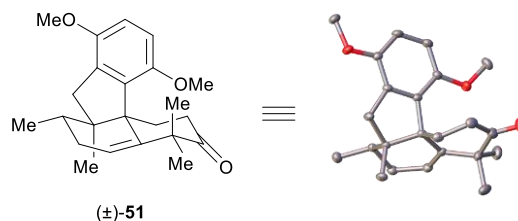

|                                             |                                                               |
|---------------------------------------------|---------------------------------------------------------------|
| Identification code                         | CCDC 2192302                                                  |
| Empirical formula                           | C <sub>23</sub> H <sub>30</sub> O <sub>3</sub>                |
| Formula weight                              | 354.47                                                        |
| Temperature/K                               | 113.15                                                        |
| Crystal system                              | orthorhombic                                                  |
| Space group                                 | P212121                                                       |
| a/Å                                         | 9.4840(3)                                                     |
| b/Å                                         | 13.8807(3)                                                    |
| c/Å                                         | 14.0827(3)                                                    |
| α/°                                         | 90                                                            |
| β/°                                         | 90                                                            |
| γ/°                                         | 90                                                            |
| Volume/Å <sup>3</sup>                       | 1853.91(8)                                                    |
| Z                                           | 4                                                             |
| ρ <sub>calc.</sub> g/cm <sup>3</sup>        | 1.270                                                         |
| μ/mm <sup>-1</sup>                          | 0.082                                                         |
| F(000)                                      | 768.0                                                         |
| Crystal size/mm <sup>3</sup>                | 0.22 × 0.2 × 0.16                                             |
| Radiation                                   | Mo Kα (λ = 0.71073)                                           |
| 2 <sup>θ</sup> range for data collection/°  | 4.12 to 65.634                                                |
| Index ranges                                | -14 ≤ h ≤ 14, -20 ≤ k ≤ 21, -21 ≤ l ≤ 20                      |
| Reflections collected                       | 23157                                                         |
| Independent reflections                     | 6371 [R <sub>int</sub> = 0.0330, R <sub>sigma</sub> = 0.0296] |
| Data/restraints/parameters                  | 6371/0/242                                                    |
| Goodness-of-fit on F <sup>2</sup>           | 1.044                                                         |
| Final R indexes                             | R <sub>1</sub> = 0.0356, wR <sub>2</sub> = 0.0890             |
| Final R indexes [all data]                  | R <sub>1</sub> = 0.0397, wR <sub>2</sub> = 0.0916             |
| Largest diff. peak/hole / e Å <sup>-3</sup> | 0.27/-0.16                                                    |

**Table S14. Crystal data and structure refinement for (±)-dysiherbol B (7).**

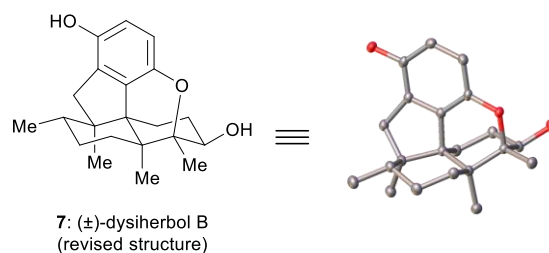

|                                             |                                                               |
|---------------------------------------------|---------------------------------------------------------------|
| Identification code                         | CCDC 2141304                                                  |
| Empirical formula                           | C <sub>21</sub> H <sub>28</sub> O <sub>3</sub>                |
| Formula weight                              | 328.43                                                        |
| Temperature/K                               | 100.01(10)                                                    |
| Crystal system                              | monoclinic                                                    |
| Space group                                 | P2 <sub>1</sub> /C                                            |
| a/Å                                         | 13.35230(10)                                                  |
| b/Å                                         | 7.54950(10)                                                   |
| c/Å                                         | 16.84080(10)                                                  |
| α/°                                         | 90                                                            |
| β/°                                         | 98.7890(10)                                                   |
| γ/°                                         | 90                                                            |
| Volume/Å <sup>3</sup>                       | 1677.69(3)                                                    |
| Z                                           | 4                                                             |
| ρ <sub>calc.</sub> g/cm <sup>3</sup>        | 1.300                                                         |
| μ/mm <sup>-1</sup>                          | 0.672                                                         |
| F(000)                                      | 712.0                                                         |
| Crystal size/mm <sup>3</sup>                | 0.22 × 0.21 × 0.08                                            |
| Radiation                                   | CuKα (λ = 1.54184)                                            |
| 2 <sup>θ</sup> range for data collection/°  | 11.674 to 151.666                                             |
| Index ranges                                | -16 ≤ h ≤ 16, -9 ≤ k ≤ 9, -20 ≤ l ≤ 19                        |
| Reflections collected                       | 13374                                                         |
| Independent reflections                     | 3407 [R <sub>int</sub> = 0.0312, R <sub>sigma</sub> = 0.0302] |
| Data/restraints/parameters                  | 3407/0/223                                                    |
| Goodness-of-fit on F <sup>2</sup>           | 1.083                                                         |
| Final R indexes                             | R <sub>1</sub> = 0.0404, wR <sub>2</sub> = 0.1079             |
| Final R indexes [all data]                  | R <sub>1</sub> = 0.0439, wR <sub>2</sub> = 0.1106             |
| Largest diff. peak/hole / e Å <sup>-3</sup> | 0.25/-0.26                                                    |

**Table S15. Crystal data and structure refinement for (±)-dysiherbol C (8).**

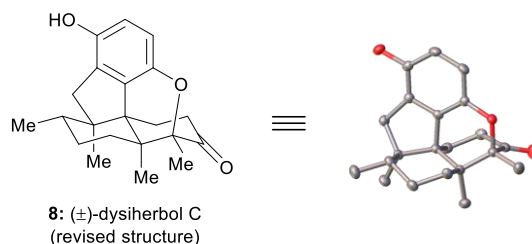

|                                             |                                                               |
|---------------------------------------------|---------------------------------------------------------------|
| Identification code                         | CCDC 2141326                                                  |
| Empirical formula                           | C <sub>21</sub> H <sub>26</sub> O <sub>3</sub>                |
| Formula weight                              | 326.42                                                        |
| Temperature/K                               | 150.00(10)                                                    |
| Crystal system                              | orthorhombic                                                  |
| Space group                                 | Pbca                                                          |
| a/Å                                         | 7.46953(17)                                                   |
| b/Å                                         | 17.2423(4)                                                    |
| c/Å                                         | 25.6766(6)                                                    |
| α/°                                         | 90                                                            |
| β/°                                         | 90                                                            |
| γ/°                                         | 90                                                            |
| Volume/Å <sup>3</sup>                       | 3306.93(13)                                                   |
| Z                                           | 8                                                             |
| ρ <sub>calc.</sub> g/cm <sup>3</sup>        | 1.311                                                         |
| μ/mm <sup>-1</sup>                          | 0.681                                                         |
| F(000)                                      | 1408.0                                                        |
| Crystal size/mm <sup>3</sup>                | 0.22 × 0.21 × 0.11                                            |
| Radiation                                   | CuKα (λ = 1.54184)                                            |
| 2 <sup>θ</sup> range for data collection/°  | 13.37 to 133.996                                              |
| Index ranges                                | -8 ≤ h ≤ 8, -20 ≤ k ≤ 20, -25 ≤ l ≤ 30                        |
| Reflections collected                       | 9856                                                          |
| Independent reflections                     | 2827 [R <sub>int</sub> = 0.0423, R <sub>sigma</sub> = 0.0401] |
| Data/restraints/parameters                  | 2827/0/222                                                    |
| Goodness-of-fit on F <sup>2</sup>           | 1.059                                                         |
| Final R indexes                             | R <sub>1</sub> = 0.0406, wR <sub>2</sub> = 0.1035             |
| Final R indexes [all data]                  | R <sub>1</sub> = 0.0461, wR <sub>2</sub> = 0.1073             |
| Largest diff. peak/hole / e Å <sup>-3</sup> | 0.18/-0.23                                                    |

## VI. References

- 1 (a) K. C. Nicolaou, P. G. Bulger and D. Sarlah, *Angew. Chem., Int. Ed.*, 2005, **44**, 4442; (b) A. B. Dounay and L. E. Overman, *Chem. Rev.*, 2003, **103**, 2945; (c) A. Endo, A. Yanagisawa, M. Abe, S. Tohma, T. Kan and T. Fukuyama, *J. Am. Chem. Soc.*, 2002, **124**, 6552; (d) S. P. Govek and L. E. Overman, *J. Am. Chem. Soc.*, 2001, **123**, 9468; (e) L. E. Overman, *Pure Appl. Chem.*, 1994, **66**, 1423; (f) C. Y. Hong, N. Kado and L. E. Overman, *J. Am. Chem. Soc.*, 1993, **115**, 11028.
- 2 These experiments were performed in the enantiomeric series.
- 3 C. Chong, Q. Zhang, J. Ke, H. Zhang, X. Yang, B. Wang, W. Ding and Z. Lu, *Angew. Chem., Int. Ed.*, 2021, **60**, 13807.
- 4 J. Baars, I. Grimm, D. Blunk, J.-M., Neudörfl and H.-G. Schmalz, *Angew. Chem., Int. Ed.*, 2021, **60**, 14915.
- 5 W.-H. Jiao, G.-H. Shi, T.-T. Xu, G.-D. Chen, B.-B. Gu, Z. Wang, S. Peng, S.-P. Wang, J. Li, B.-N. Han, W. Zhang and H.-W. Lin, *J. Nat. Prod.*, 2016, **79**, 406.
- 6 H.-Y. Liu, M. Zhou, R.-Y. Shang, L.-L. Hong, G.-H. Wang, W.-J. Tian, W.-H. Jiao, H.-F. Chen and H.-W. Lin, *Chin. J. Nat. Med.*, 2022, **20**, 148.
